# Supplementary material
Source: MDPI journal article supplement (https://www.mdpi.com/2673-9879/2/2/13)
Supplement: s1 [file s1]

---

# Supplementary Materials: *In Silico* ADME Profiling of Salubrinal and its Analogues

Pavlo V. Zadorozhnii, Vadym V. Kiselev and Aleksandr V. Kharchenko

**Table S1.** Structures of Salubrinal analogues containing a cinnamic acid residue.

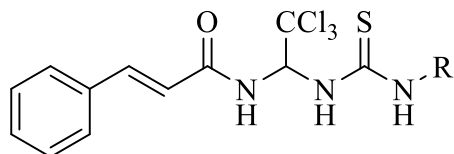

| Comp. | R | CAS No      | SMILES                                                                      |
|-------|---|-------------|-----------------------------------------------------------------------------|
| S1    |   | 405060-59-9 | <chem>ClC(Cl)(Cl)C(NC(=S)NC1=CC=CC2=C1N=CC=C2)NC(=O)\C=C\C1=CC=CC=C1</chem> |
| S2    |   | 863036-22-0 | <chem>ClC(Cl)(Cl)C(NC(=S)NC1=CC=C2C=CC=NC2=C1)NC(=O)\C=C\C1=CC=CC=C1</chem> |
| S3    |   | 294654-78-7 | <chem>ClC(Cl)(Cl)C(NC(=S)NC1=CC=CC2=C1C=CC=C2)NC(=O)\C=C\C1=CC=CC=C1</chem> |
| S4    |   | 324769-18-8 | <chem>ClC(Cl)(Cl)C(NC(=S)NC1=CC=C2C=CC=CC2=C1)NC(=O)\C=C\C1=CC=CC=C1</chem> |
| S5    |   | 405060-99-3 | <chem>NC(=O)CNC(=S)NC(NC(=O)\C=C\C1=CC=CC=C1)C(Cl)(Cl)Cl</chem>             |

| Comp. | R                                                                                   | CAS No       | SMILES                                                                      |
|-------|-------------------------------------------------------------------------------------|--------------|-----------------------------------------------------------------------------|
| S6    | 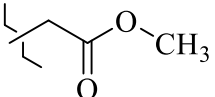   | 405060-96-0  | <chem>COC(=O)CNC(=S)NC(NC(=O)\C=C\C1=CC=CC=C1)C(Cl)(Cl)Cl</chem>            |
| S7    |    | 863036-35-5  | <chem>CC(C)(C)OC(=O)NCCCCNC(=S)NC(NC(=O)\C=C\C1=CC=CC=C1)C(Cl)(Cl)Cl</chem> |
| S8    |    | 301359-85-3  | <chem>ClC(Cl)(Cl)C(NC(=S)NC1=CC=CC=C1)NC(=O)\C=C\C1=CC=CC=C1</chem>         |
| S9    |    | 301359-95-5  | <chem>CC1=CC=CC=C1NC(=S)NC(NC(=O)\C=C\C1=CC=CC=C1)C(Cl)(Cl)Cl</chem>        |
| S10   |    | 301359-86-4  | <chem>CC1=CC(NC(=S)NC(NC(=O)\C=C\C2=CC=CC=C2)C(Cl)(Cl)Cl)=CC=C1</chem>      |
| S11   |    | 301359-87-5  | <chem>CC1=CC=C(NC(=S)NC(NC(=O)\C=C\C2=CC=CC=C2)C(Cl)(Cl)Cl)C=C1</chem>      |
| S12   |   | 1429483-71-5 | <chem>CC1=C(C)C(NC(=S)NC(NC(=O)\C=C\C2=CC=CC=C2)C(Cl)(Cl)Cl)=CC=C1</chem>   |
| S13   |  | 301359-93-3  | <chem>CC1=CC=C(NC(=S)NC(NC(=O)\C=C\C2=CC=CC=C2)C(Cl)(Cl)Cl)C(C)=C1</chem>   |

| Comp. | R                                                                                   | CAS No       | SMILES                                                                      |
|-------|-------------------------------------------------------------------------------------|--------------|-----------------------------------------------------------------------------|
| S14   | 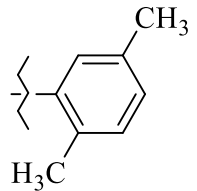   | 301359-94-4  | <chem>CC1=CC=C(C)C(NC(=S)NC(NC(=O)\C=C\C2=CC=CC=C2)C(Cl)(Cl)Cl)=C1</chem>   |
| S15   |    | 294657-79-7  | <chem>OC1=CC=CC=C1NC(=S)NC(NC(=O)\C=C\C1=CC=CC=C1)C(Cl)(Cl)Cl</chem>        |
| S16   |    | 3037775-31-7 | <chem>OC1=CC(NC(=S)NC(NC(=O)\C=C\C2=CC=CC=C2)C(Cl)(Cl)Cl)=CC=C1</chem>      |
| S17   |    | 405060-94-8  | <chem>SC1=CC=CC=C1NC(=S)NC(NC(=O)\C=C\C1=CC=CC=C1)C(Cl)(Cl)Cl</chem>        |
| S18   |    | 301359-88-6  | <chem>COC1=CC=CC=C1NC(=S)NC(NC(=O)\C=C\C1=CC=CC=C1)C(Cl)(Cl)Cl</chem>       |
| S19   |  | 1346508-38-0 | <chem>COC1=CC=C(NC(=S)NC(NC(=O)\C=C\C2=CC=CC=C2)C(Cl)(Cl)Cl)C=C1</chem>     |
| S20   |  | 303775-35-5  | <chem>OC(=O)C1=CC=CC=C1NC(=S)NC(NC(=O)\C=C\C1=CC=CC=C1)C(Cl)(Cl)Cl</chem>   |
| S21   |  | 294655-14-4  | <chem>OC(=O)C1=CC=C(NC(=S)NC(NC(=O)\C=C\C2=CC=CC=C2)C(Cl)(Cl)Cl)C=C1</chem> |

| Comp. | R | CAS No      | SMILES                                                                       |
|-------|---|-------------|------------------------------------------------------------------------------|
| S22   |   | 294655-12-2 | <chem>COC(=O)C1=CC=CC=C1NC(=S)NC(NC(=O)\C=C\C1=CC=CC=C1)C(Cl)(Cl)Cl</chem>   |
| S23   |   | 294654-81-2 | <chem>ClC(Cl)(Cl)C(NC(=S)NC1=CC=CC(=C1)N(=O)=O)NC(=O)\C=C\C1=CC=CC=C1</chem> |
| S24   |   | 294654-82-3 | <chem>ClC(Cl)(Cl)C(NC(=S)NC1=CC=C(C=C1)N(=O)=O)NC(=O)\C=C\C1=CC=CC=C1</chem> |
| S25   |   | 301359-89-7 | <chem>ClC1=CC=CC=C1NC(=S)NC(NC(=O)\C=C\C1=CC=CC=C1)C(Cl)(Cl)Cl</chem>        |
| S26   |   | 301359-90-0 | <chem>ClC1=CC(NC(=S)NC(NC(=O)\C=C\C2=CC=CC=C2)C(Cl)(Cl)Cl)=CC=C1</chem>      |
| S27   |   | 301359-91-1 | <chem>ClC1=CC=C(NC(=S)NC(NC(=O)\C=C\C2=CC=CC=C2)C(Cl)(Cl)Cl)C=C1</chem>      |
| S28   |   | 301359-92-2 | <chem>ClC(Cl)(Cl)C(NC(=O)\C=C\C1=CC=CC=C1)NC(=S)NC1=CC=C(Br)C=C1</chem>      |
| S29   |   | 301359-97-7 | <chem>ClC1=CC=C(NC(=S)NC(NC(=O)\C=C\C2=CC=CC=C2)C(Cl)(Cl)Cl)C(Cl)=C1</chem>  |

| Comp. | R | CAS No       | SMILES                                                                                |
|-------|---|--------------|---------------------------------------------------------------------------------------|
| S30   |   | 301359-98-8  | <chem>ClC1=CC=C(Cl)C(NC(=S)NC(NC(=O)\C=C\C2=CC=CC=C2)C(Cl)(Cl)Cl)=C1</chem>           |
| S31   |   | 301359-96-6  | <chem>FC(F)(F)C1=CC=C(Cl)C(NC(=S)NC(NC(=O)\C=C\C2=CC=CC=C2)C(Cl)(Cl)Cl)=C1</chem>     |
| S32   |   | 301815-13-4  | <chem>CC(=O)NC1=CC=C(NC(=S)NC(NC(=O)\C=C\C2=CC=CC=C2)C(Cl)(Cl)Cl)C=C1</chem>          |
| S33   |   | 294653-17-1  | <chem>ClC(Cl)(Cl)C(NC(=S)NC1=CC=C(C=C1)\N=N\C1=CC=CC=C1)NC(=O)\C=C\C1=CC=CC=C1</chem> |
| S34   |   | 294654-77-6  | <chem>NS(=O)(=O)C1=CC=C(NC(=S)NC(NC(=O)\C=C\C2=CC=CC=C2)C(Cl)(Cl)Cl)C=C1</chem>       |
| S35   |   | 863036-23-1  | <chem>ClC(Cl)(Cl)C(NC(=S)NC1=CC=CC=N1)NC(=O)\C=C\C1=CC=CC=C1</chem>                   |
| S36   |   | 1349267-41-9 | <chem>CC1=CC(Br)=C(NC(=S)NC(NC(=O)\C=C\C2=CC=CC=C2)C(Cl)(Cl)Cl)N=C1</chem>            |
| S37   |   | 1349267-41-9 | <chem>ClC(Cl)(Cl)C(NC(=O)\C=C\C1=CC=CC=C1)NC(=S)NC1CCS(=O)(=O)C1</chem>               |

| Comp. | R                                                                                 | CAS No       | SMILES                                                             |
|-------|-----------------------------------------------------------------------------------|--------------|--------------------------------------------------------------------|
| S38   | 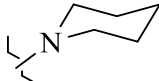 | 1346508-37-9 | <chem>ClC(Cl)(Cl)C(NC(=O)\C=C\C1=CC=CC=C1)NC(=S)N1CCCCC1</chem>    |
| S39   |  | 1346508-36-8 | <chem>ClC(Cl)(Cl)C(NC(=O)\C=C\C1=CC=CC=C1)NC(=S)N1CCOCC1</chem>    |
| S40   |  | 1429483-72-6 | <chem>CN1CCN(CC1)C(=S)NC(NC(=O)\C=C\C1=CC=CC=C1)C(Cl)(Cl)Cl</chem> |

**Table S2.** Structures of Salubrinol analogues containing quinoline ring.

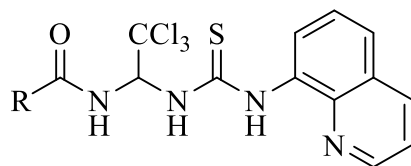

| Comp. | R                                                                                   | CAS No      | SMILES                                                                  |
|-------|-------------------------------------------------------------------------------------|-------------|-------------------------------------------------------------------------|
| S41   | CH <sub>3</sub> -                                                                   | 294658-37-0 | <chem>CC(=O)NC(NC(=S)NC1=CC=CC2=C1N=CC=C2)C(Cl)(Cl)Cl</chem>            |
| S42   | 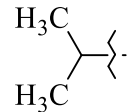  | 324769-75-5 | <chem>CC(C)C(=O)NC(NC(=S)NC1=CC=CC2=C1N=CC=C2)C(Cl)(Cl)Cl</chem>        |
| S43   |  | 294658-28-9 | <chem>CC(C)CC(=O)NC(NC(=S)NC1=CC=CC2=C1N=CC=C2)C(Cl)(Cl)Cl</chem>       |
| S44   | (CH <sub>3</sub> ) <sub>3</sub> C-                                                  | 412962-51-7 | <chem>CC(C)(C)C(=O)NC(NC(=S)NC1=CC=CC2=C1N=CC=C2)C(Cl)(Cl)Cl</chem>     |
| S45   |  | 305856-11-5 | <chem>ClC(Cl)(Cl)C(NC(=O)CC1=CC=CC=C1)NC(=S)NC1=CC=CC2=C1N=CC=C2</chem> |

| Comp. | R                                                                                   | CAS No       | SMILES                                                                           |
|-------|-------------------------------------------------------------------------------------|--------------|----------------------------------------------------------------------------------|
| S46   | 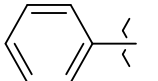   | 294646-80-3  | <chem>ClC(Cl)(Cl)C(NC(=S)NC1=CC=CC2=C1N=CC=C2)NC(=O)C1=CC=CC=C1</chem>           |
| S47   |    | 324017-95-0  | <chem>CC1=C(C=CC=C1)C(=O)NC(NC(=S)NC1=CC=CC2=C1N=CC=C2)C(Cl)(Cl)Cl</chem>        |
| S48   |    | 330684-99-6  | <chem>CC1=CC=CC(=C1)C(=O)NC(NC(=S)NC1=CC=CC2=C1N=CC=C2)C(Cl)(Cl)Cl</chem>        |
| S49   |    | 294658-30-3  | <chem>CC1=CC=C(C=C1)C(=O)NC(NC(=S)NC1=CC=CC2=C1N=CC=C2)C(Cl)(Cl)Cl</chem>        |
| S50   |    | 330567-60-7  | <chem>ClC(Cl)(Cl)C(NC(=S)NC1=CC=CC2=C1N=CC=C2)NC(=O)C1=CC=C(Br)C=C1</chem>       |
| S51   |    | 294658-45-0  | <chem>COC1=CC=C(C=C1)C(=O)NC(NC(=S)NC1=CC=CC2=C1N=CC=C2)C(Cl)(Cl)Cl</chem>       |
| S52   |   | 405060-98-2  | <chem>ClC(Cl)(Cl)C(NC(=S)NC1=CC=CC2=C1N=CC=C2)NC(=O)C1=CC2=C(C=CC=C2)C=C1</chem> |
| S53   |  | 324017-57-4  | <chem>ClC(Cl)(Cl)C(NC(=S)NC1=CC=CC2=C1N=CC=C2)NC(=O)C1=CC=CO1</chem>             |
| S54   |  | 1346508-21-1 | <chem>ClC(Cl)(Cl)C(NC(=S)NC1=CC=CC2=C1N=CC=C2)NC(=O)\C=C\C1=CC=CS1</chem>        |



| Comp. | R                                                                                 | CAS No       | SMILES                                                                    |
|-------|-----------------------------------------------------------------------------------|--------------|---------------------------------------------------------------------------|
| S55   | 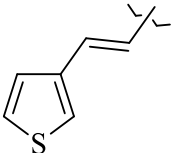 | 1346508-22-2 | <chem>ClC(Cl)(Cl)C(NC(=S)NC1=CC=CC2=C1N=CC=C2)NC(=O)\C=C\C1=CSC=C1</chem> |

**Table S3.** List of online servers used in the work.

| No | Online resource | E-link                                                                                                    |
|----|-----------------|-----------------------------------------------------------------------------------------------------------|
| 1  | ADMETlab        | <a href="http://admet.scbdd.com/">http://admet.scbdd.com/</a>                                             |
| 2  | admetSAR        | <a href="http://lmm.d.ecust.edu.cn/admetSar2/">http://lmm.d.ecust.edu.cn/admetSar2/</a>                   |
| 3  | ALOGPS 2.1      | <a href="http://www.vcclab.org/lab/alogps/start.html">http://www.vcclab.org/lab/alogps/start.html</a>     |
| 4  | Molinspiration  | <a href="https://www.molinspiration.com/">https://www.molinspiration.com/</a>                             |
| 5  | pkCSM           | <a href="http://biosig.unimelb.edu.au/pkcsM/">http://biosig.unimelb.edu.au/pkcsM/</a>                     |
| 6  | SuperCYPsPred   | <a href="http://insilico-cyp.charite.de/SuperCYPsPred/">http://insilico-cyp.charite.de/SuperCYPsPred/</a> |
| 7  | SciFinder       | <a href="https://scifinder.cas.org">https://scifinder.cas.org</a>                                         |
| 8  | SwissADME       | <a href="http://www.swissadme.ch/">http://www.swissadme.ch/</a>                                           |
| 9  | Vienna LiverTox | <a href="https://liverTox.univie.ac.at/">https://liverTox.univie.ac.at/</a>                               |

**Table S4.** Prediction results of the absorption of Salubrinol and its analogues in the human intestine.

| Comp. | ADMETLab |       | admetSAR 2.0 * |       | SwissADME | Lipinski rules    |                               |                                  |          | Veber rules                |                          |
|-------|----------|-------|----------------|-------|-----------|-------------------|-------------------------------|----------------------------------|----------|----------------------------|--------------------------|
|       | result   | prob. | result         | prob. |           | M <sub>w</sub> ** | N <sub>H</sub> bond donors ** | N <sub>H</sub> bond acceptors ** | LogP *** | N <sub>rot. bonds</sub> ** | PSA ****, Å <sup>2</sup> |
| S1    | ++       | 0.735 | +              | 0.916 | High      | 479.82            | 3                             | 5                                | 2.71     | 8                          | 69.78                    |
| S2    | ++       | 0.727 | +              | 0.920 | High      | 479.82            | 3                             | 5                                | 2.71     | 8                          | 72.02                    |
| S3    | +        | 0.693 | +              | 0.944 | High      | 478.83            | 3                             | 4                                | 3.87     | 8                          | 60.17                    |
| S4    | +        | 0.693 | +              | 0.944 | High      | 478.83            | 3                             | 4                                | 3.87     | 8                          | 60.74                    |
| S5    | +        | 0.598 | +              | 0.922 | High      | 409.73            | 5                             | 6                                | 1.33     | 9                          | 84.08                    |
| S6    | +        | 0.520 | +              | 0.930 | High      | 424.74            | 3                             | 6                                | 1.98     | 10                         | 85.72                    |
| S7    | –        | 0.497 | +              | 0.948 | High      | 523.91            | 4                             | 7                                | 2.91     | 14                         | 89.34                    |
| S8    | +        | 0.675 | +              | 0.931 | High      | 428.77            | 3                             | 4                                | 3.20     | 8                          | 56.65                    |
| S9    | +        | 0.679 | +              | 0.955 | High      | 442.80            | 3                             | 4                                | 3.82     | 8                          | 57.56                    |
| S10   | +        | 0.689 | +              | 0.955 | High      | 442.80            | 3                             | 4                                | 3.82     | 8                          | 57.58                    |

| Comp. | ADMETLab |       | admetSAR 2.0 * |       | SwissADME | Lipinski rules    |                              |                                 |          | Veber rules                |                         |
|-------|----------|-------|----------------|-------|-----------|-------------------|------------------------------|---------------------------------|----------|----------------------------|-------------------------|
|       | result   | prob. | result         | prob. |           | M <sub>w</sub> ** | N <sub>H</sub> bond donors** | N <sub>H</sub> bond acceptors** | LogP *** | N <sub>rot. bonds</sub> ** | PSA ***, Å <sup>2</sup> |
| S11   | +        | 0.689 | +              | 0.955 | High      | 442.80            | 3                            | 4                               | 3.82     | 8                          | 57.27                   |
| S12   | +        | 0.673 | +              | 0.955 | High      | 456.83            | 3                            | 4                               | 4.04     | 8                          | 56.96                   |
| S13   | +        | 0.673 | +              | 0.955 | High      | 456.83            | 3                            | 4                               | 4.04     | 8                          | 56.60                   |
| S14   | +        | 0.673 | +              | 0.955 | High      | 456.83            | 3                            | 4                               | 4.04     | 8                          | 58.61                   |
| S15   | +        | 0.570 | +              | 0.929 | High      | 444.77            | 4                            | 5                               | 3.04     | 8                          | 70.63                   |
| S16   | +        | 0.554 | +              | 0.929 | High      | 444.77            | 4                            | 5                               | 3.04     | 8                          | 71.70                   |
| S17   | +        | 0.650 | +              | 0.913 | Low       | 460.84            | 3                            | 4                               | 3.87     | 8                          | 83.09                   |
| S18   | +        | 0.552 | +              | 0.946 | High      | 458.80            | 3                            | 5                               | 3.26     | 9                          | 68.41                   |
| S19   | +        | 0.541 | +              | 0.946 | High      | 458.80            | 3                            | 5                               | 3.26     | 9                          | 68.78                   |
| S20   | –        | 0.467 | +              | 0.831 | High      | 472.78            | 4                            | 6                               | 2.08     | 9                          | 85.86                   |
| S21   | –        | 0.483 | +              | 0.835 | High      | 472.78            | 4                            | 6                               | 2.08     | 9                          | 88.08                   |
| S22   | +        | 0.516 | +              | 0.918 | High      | 486.81            | 3                            | 6                               | 3.40     | 10                         | 80.13                   |
| S23   | +        | 0.616 | +              | 0.863 | Low       | 473.77            | 3                            | 7                               | 2.16     | 9                          | 101.18                  |
| S24   | +        | 0.616 | +              | 0.863 | Low       | 473.77            | 3                            | 7                               | 2.16     | 9                          | 100.34                  |
| S25   | +        | 0.649 | +              | 0.937 | High      | 463.22            | 3                            | 4                               | 4.09     | 8                          | 57.58                   |
| S26   | +        | 0.658 | +              | 0.937 | High      | 463.22            | 3                            | 4                               | 4.09     | 8                          | 57.51                   |
| S27   | +        | 0.658 | +              | 0.937 | High      | 463.22            | 3                            | 4                               | 4.09     | 8                          | 57.34                   |
| S28   | +        | 0.628 | +              | 0.915 | High      | 507.67            | 3                            | 4                               | 3.79     | 8                          | 57.61                   |
| S29   | +        | 0.649 | +              | 0.937 | High      | 497.66            | 3                            | 4                               | 4.57     | 8                          | 57.17                   |
| S30   | +        | 0.649 | +              | 0.937 | High      | 497.66            | 3                            | 4                               | 4.57     | 8                          | 57.40                   |
| S31   | +        | 0.66  | +              | 0.930 | Low       | 531.21            | 3                            | 4                               | 4.89     | 9                          | 56.87                   |
| S32   | +        | 0.642 | +              | 0.955 | High      | 485.82            | 4                            | 6                               | 3.00     | 9                          | 80.83                   |
| S33   | +        | 0.678 | +              | 0.931 | Low       | 532.88            | 3                            | 6                               | 3.87     | 10                         | 79.21                   |
| S34   | +        | 0.666 | +              | 0.869 | Low       | 507.85            | 5                            | 7                               | 2.10     | 9                          | 110.44                  |
| S35   | ++       | 0.709 | +              | 0.900 | High      | 429.76            | 3                            | 5                               | 2.16     | 8                          | 69.08                   |
| S36   | +        | 0.650 | +              | 0.914 | High      | 522.68            | 3                            | 5                               | 2.98     | 8                          | 68.30                   |
| S37   | +        | 0.585 | +              | 0.903 | High      | 470.83            | 3                            | 6                               | 1.33     | 8                          | 102.54                  |
| S38   | ++       | 0.728 | +              | 0.936 | High      | 420.79            | 2                            | 4                               | 2.55     | 7                          | 58.87                   |
| S39   | +        | 0.690 | +              | 0.928 | High      | 422.77            | 2                            | 5                               | 1.49     | 7                          | 68.78                   |
| S40   | ++       | 0.739 | +              | 0.949 | High      | 435.81            | 2                            | 5                               | 2.12     | 7                          | 62.40                   |
| S41   | ++       | 0.737 | +              | 0.950 | High      | 391.71            | 3                            | 5                               | 1.84     | 6                          | 69.92                   |

| Comp. | ADMETLab |       | admetSAR 2.0 * |       | SwissADME | Lipinski rules    |                              |                                 |          | Veber rules                |                          |
|-------|----------|-------|----------------|-------|-----------|-------------------|------------------------------|---------------------------------|----------|----------------------------|--------------------------|
|       | result   | prob. | result         | prob. |           | M <sub>w</sub> ** | N <sub>H</sub> bond donors** | N <sub>H</sub> bond acceptors** | LogP *** | N <sub>rot. bonds</sub> ** | PSA ****, Å <sup>2</sup> |
| S42   | ++       | 0.726 | +              | 0.961 | High      | 419.76            | 3                            | 5                               | 2.31     | 7                          | 69.36                    |
| S43   | ++       | 0.704 | +              | 0.955 | High      | 433.79            | 3                            | 5                               | 2.54     | 8                          | 69.65                    |
| S44   | ++       | 0.723 | +              | 0.949 | High      | 433.79            | 3                            | 5                               | 2.54     | 7                          | 68.58                    |
| S45   | ++       | 0.702 | +              | 0.901 | High      | 467.81            | 3                            | 5                               | 2.57     | 8                          | 70.02                    |
| S46   | ++       | 0.732 | +              | 0.946 | High      | 453.78            | 3                            | 5                               | 2.62     | 7                          | 72.74                    |
| S47   | ++       | 0.730 | +              | 0.970 | High      | 467.81            | 3                            | 5                               | 3.24     | 7                          | 71.77                    |
| S48   | ++       | 0.737 | +              | 0.964 | High      | 467.81            | 3                            | 5                               | 3.24     | 7                          | 72.69                    |
| S49   | ++       | 0.737 | +              | 0.964 | High      | 467.81            | 3                            | 5                               | 3.24     | 7                          | 71.57                    |
| S50   | +        | 0.683 | +              | 0.932 | High      | 532.68            | 3                            | 5                               | 5.39     | 7                          | 73.17                    |
| S51   | +        | 0.572 | +              | 0.962 | High      | 483.81            | 3                            | 6                               | 2.70     | 8                          | 83.18                    |
| S52   | ++       | 0.732 | +              | 0.946 | High      | 503.84            | 3                            | 5                               | 3.28     | 7                          | 72.41                    |
| S53   | +        | 0.675 | +              | 0.936 | High      | 443.74            | 3                            | 6                               | 1.40     | 7                          | 81.98                    |
| S54   | ++       | 0.734 | +              | 0.843 | Low       | 485.85            | 3                            | 5                               | 2.32     | 8                          | 91.55                    |
| S55   | ++       | 0.734 | +              | 0.843 | Low       | 485.85            | 3                            | 5                               | 2.32     | 8                          | 93.48                    |

\* The obtained values of the probability for the unification of the results were rounded to thousandths; \*\* The parameter was calculated using Molinspiration; \*\*\* The LogP value obtained by the Moriguchi method (MLogP) (see Table S5 below); \*\*\*\* The polar surface area was calculated using the 3D PSA method in the PyMOL 0.99rc6 program (see Table S6 below).

**Table S5.** Lipophilicity (LogP<sub>o/w</sub>) prediction results for Salubrinol and its analogues using various online servers.

| Comp. | admetSAR 2.0 (ALOGP) | ADMETLab * (ALOGP) | SwissADME |        |       |       |            | Molinspiration (miLOGP) | ALOGPS 2.1 (ALOGPs) | Consensus LogP ** |
|-------|----------------------|--------------------|-----------|--------|-------|-------|------------|-------------------------|---------------------|-------------------|
|       |                      |                    | iLOGP     | XLOGP3 | WLOGP | MLOGP | SILICOS-IT |                         |                     |                   |
| S1    | 5.05                 | 5.05               | 3.18      | 5.21   | 4.75  | 2.71  | 5.32       | 4.59                    | 4.94                | 4.47              |
| S2    | 5.05                 | 5.05               | 3.61      | 5.21   | 4.75  | 2.71  | 5.32       | 4.61                    | 4.95                | 4.53              |
| S3    | 5.65                 | 5.65               | 3.40      | 6.19   | 5.35  | 3.87  | 5.88       | 5.79                    | 5.63                | 5.22              |
| S4    | 5.65                 | 5.65               | 3.25      | 6.19   | 5.35  | 3.87  | 5.88       | 5.81                    | 5.63                | 5.20              |
| S5    | 1.46                 | 1.46               | 2.04      | 2.33   | 1.35  | 1.33  | 2.81       | 2.30                    | 2.76                | 2.05              |
| S6    | 2.15                 | 2.15               | 3.11      | 3.30   | 2.04  | 1.98  | 3.60       | 3.43                    | 3.22                | 2.85              |
| S7    | 4.28                 | 4.28               | 3.81      | 4.80   | 4.17  | 2.91  | 5.00       | 4.93                    | 4.50                | 4.30              |
| S8    | 4.50                 | 4.50               | 3.25      | 4.94   | 4.20  | 3.20  | 4.80       | 4.63                    | 4.65                | 4.27              |
| S9    | 4.81                 | 4.81               | 3.56      | 5.30   | 4.51  | 3.82  | 5.34       | 5.03                    | 4.85                | 4.65              |

| Comp. | admetSAR 2.0<br>(ALOGP) | ADMETLab *<br>(ALOGP) | SwissADME |        |       |       |            | Molinspiration<br>(miLOGP) | ALOGPS 2.1<br>(ALOGPs) | Consensus<br>LogP ** |
|-------|-------------------------|-----------------------|-----------|--------|-------|-------|------------|----------------------------|------------------------|----------------------|
|       |                         |                       | iLOGP     | XLOGP3 | WLOGP | MLOGP | SILICOS-IT |                            |                        |                      |
| S10   | 4.81                    | 4.81                  | 3.40      | 5.30   | 4.51  | 3.82  | 5.34       | 5.05                       | 4.87                   | 4.64                 |
| S11   | 4.81                    | 4.81                  | 3.66      | 5.30   | 4.51  | 3.82  | 5.34       | 5.08                       | 4.88                   | 4.68                 |
| S12   | 5.12                    | 5.12                  | 3.70      | 5.67   | 4.82  | 4.04  | 5.87       | 5.43                       | 5.10                   | 4.97                 |
| S13   | 5.12                    | 5.12                  | 3.63      | 5.67   | 4.82  | 4.04  | 5.87       | 5.46                       | 5.11                   | 4.97                 |
| S14   | 5.12                    | 5.12                  | 3.44      | 5.67   | 4.82  | 4.04  | 5.87       | 5.46                       | 5.10                   | 4.94                 |
| S15   | 4.20                    | 4.20                  | 2.69      | 4.58   | 3.90  | 3.04  | 4.34       | 4.36                       | 4.62                   | 3.97                 |
| S16   | 4.20                    | 4.20                  | 3.24      | 4.58   | 3.90  | 3.04  | 4.34       | 4.13                       | 4.62                   | 4.01                 |
| S17   | 4.79                    | 4.79                  | 3.02      | 5.09   | 4.49  | 3.87  | 5.11       | 4.81                       | 5.53                   | 4.59                 |
| S18   | 4.51                    | 4.51                  | 3.48      | 4.91   | 4.21  | 3.26  | 4.89       | 4.64                       | 4.69                   | 4.32                 |
| S19   | 4.51                    | 4.51                  | 3.17      | 4.91   | 4.21  | 3.26  | 4.89       | 4.69                       | 4.73                   | 4.30                 |
| S20   | 4.20                    | 4.20                  | 2.56      | 5.02   | 3.90  | 2.08  | 4.31       | 4.67                       | 4.55                   | 3.91                 |
| S21   | 4.20                    | 4.20                  | 2.80      | 4.47   | 3.90  | 2.08  | 4.31       | 4.54                       | 4.46                   | 3.85                 |
| S22   | 4.29                    | 4.29                  | 3.23      | 5.34   | 3.99  | 3.40  | 4.86       | 4.93                       | 4.57                   | 4.33                 |
| S23   | 4.41                    | 4.41                  | 3.43      | 4.77   | 4.63  | 2.16  | 3.10       | 4.57                       | 4.85                   | 3.99                 |
| S24   | 4.41                    | 4.41                  | 2.68      | 4.77   | 4.63  | 2.16  | 3.10       | 4.59                       | 4.87                   | 3.90                 |
| S25   | 5.15                    | 5.15                  | 3.10      | 5.57   | 4.85  | 4.09  | 5.46       | 5.26                       | 5.21                   | 4.84                 |
| S26   | 5.15                    | 5.15                  | 3.55      | 5.57   | 4.85  | 4.09  | 5.46       | 5.28                       | 5.19                   | 4.89                 |
| S27   | 5.15                    | 5.15                  | 3.19      | 5.57   | 4.85  | 4.09  | 5.46       | 5.31                       | 5.18                   | 4.85                 |
| S28   | 5.26                    | 5.26                  | 3.15      | 5.63   | 4.96  | 3.79  | 5.50       | 5.44                       | 5.25                   | 4.87                 |
| S29   | 5.81                    | 5.81                  | 3.34      | 6.20   | 5.51  | 4.57  | 6.13       | 5.91                       | 5.80                   | 5.41                 |
| S30   | 5.81                    | 5.81                  | 3.52      | 6.20   | 5.51  | 4.57  | 6.13       | 5.91                       | 5.80                   | 5.43                 |
| S31   | 6.17                    | 6.17                  | 3.72      | 6.45   | 7.02  | 4.89  | 6.61       | 6.13                       | 5.93                   | 5.87                 |
| S32   | 4.46                    | 4.46                  | 3.15      | 4.12   | 3.97  | 3.00  | 4.54       | 3.85                       | 4.48                   | 3.95                 |
| S33   | 6.91                    | 6.91                  | 4.08      | 6.72   | 6.61  | 3.87  | 6.66       | 6.82                       | 6.01                   | 5.96                 |
| S34   | 3.15                    | 3.15                  | 2.10      | 3.50   | 3.93  | 2.10  | 3.01       | 3.32                       | 3.91                   | 3.13                 |
| S35   | 3.89                    | 3.89                  | 2.81      | 4.20   | 3.59  | 2.16  | 4.25       | 4.37                       | 4.20                   | 3.68                 |
| S36   | 4.96                    | 4.96                  | 3.73      | 5.26   | 4.67  | 2.98  | 5.48       | 5.56                       | 5.09                   | 4.72                 |
| S37   | 2.16                    | 2.16                  | 2.40      | 2.96   | 3.14  | 1.33  | 3.38       | 3.09                       | 2.84                   | 2.66                 |
| S38   | 3.87                    | 3.87                  | 3.10      | 4.41   | 3.38  | 2.55  | 4.56       | 4.72                       | 4.33                   | 3.87                 |
| S39   | 2.72                    | 2.72                  | 2.87      | 3.19   | 2.23  | 1.49  | 3.94       | 3.66                       | 3.24                   | 2.92                 |
| S40   | 2.63                    | 2.63                  | 3.12      | 3.38   | 1.76  | 2.12  | 3.57       | 3.71                       | 3.27                   | 2.95                 |

| Comp. | admetSAR 2.0<br>(ALOGP) | ADMETLab * | SwissADME |        |       |       |            | Molinspiration<br>(miLOGP) | ALOGPS 2.1<br>(ALOGPs) | Consensus<br>LogP ** |
|-------|-------------------------|------------|-----------|--------|-------|-------|------------|----------------------------|------------------------|----------------------|
|       |                         |            | iLOGP     | XLOGP3 | WLOGP | MLOGP | SILICOS-IT |                            |                        |                      |
| S41   | 3.35                    | 3.35       | 2.42      | 3.67   | 3.16  | 1.84  | 3.60       | 2.28                       | 3.37                   | 2.96                 |
| S42   | 3.99                    | 3.99       | 2.84      | 4.71   | 3.80  | 2.31  | 4.22       | 3.36                       | 4.08                   | 3.66                 |
| S43   | 4.38                    | 4.38       | 2.94      | 4.93   | 4.19  | 2.54  | 4.62       | 3.89                       | 4.26                   | 3.97                 |
| S44   | 4.38                    | 4.38       | 3.41      | 5.07   | 4.19  | 2.54  | 4.46       | 4.27                       | 4.46                   | 4.10                 |
| S45   | 4.58                    | 4.58       | 2.76      | 4.72   | 4.39  | 2.57  | 5.09       | 4.04                       | 4.60                   | 4.09                 |
| S46   | 4.65                    | 4.65       | 3.18      | 4.78   | 4.46  | 2.62  | 4.70       | 3.95                       | 4.61                   | 4.12                 |
| S47   | 4.96                    | 4.96       | 3.15      | 5.15   | 4.77  | 3.24  | 5.23       | 4.35                       | 4.78                   | 4.45                 |
| S48   | 4.96                    | 4.96       | 3.69      | 5.15   | 4.77  | 3.24  | 5.23       | 4.37                       | 4.77                   | 4.52                 |
| S49   | 4.96                    | 4.96       | 3.30      | 5.15   | 4.77  | 3.24  | 5.23       | 4.40                       | 4.78                   | 4.48                 |
| S50   | 5.41                    | 5.41       | 3.16      | 5.22   | 3.21  | 5.39  | 4.49       | 4.76                       | 5.16                   | 4.60                 |
| S51   | 4.66                    | 4.66       | 3.39      | 4.75   | 4.47  | 2.70  | 4.78       | 4.00                       | 4.56                   | 4.16                 |
| S52   | 5.80                    | 5.80       | 3.46      | 6.03   | 5.61  | 3.28  | 5.74       | 5.13                       | 5.58                   | 5.08                 |
| S53   | 4.24                    | 4.24       | 2.63      | 4.18   | 4.05  | 1.40  | 4.09       | 3.21                       | 4.01                   | 3.48                 |
| S54   | 5.11                    | 5.11       | 3.38      | 4.92   | 4.81  | 2.32  | 5.94       | 4.31                       | 4.85                   | 4.46                 |
| S55   | 5.11                    | 5.11       | 3.38      | 4.89   | 4.81  | 2.32  | 5.94       | 4.00                       | 4.84                   | 4.41                 |

\* admetSAR 2.0 and ADMETLab gave the identical ALOGP values. When calculating the LogP<sub>Consensus</sub>, the resulting ALOGP value was used only once; \*\* LogP-Consensus was calculated as the arithmetic mean of the LogP values obtained by different methods.

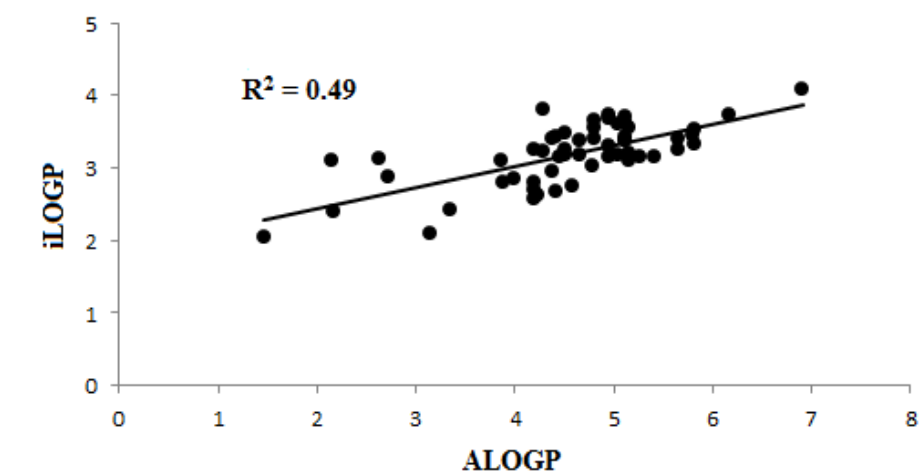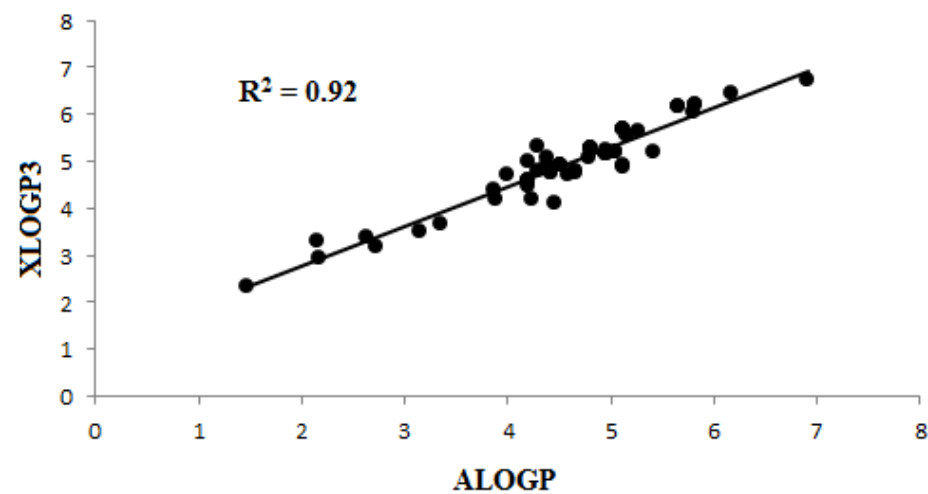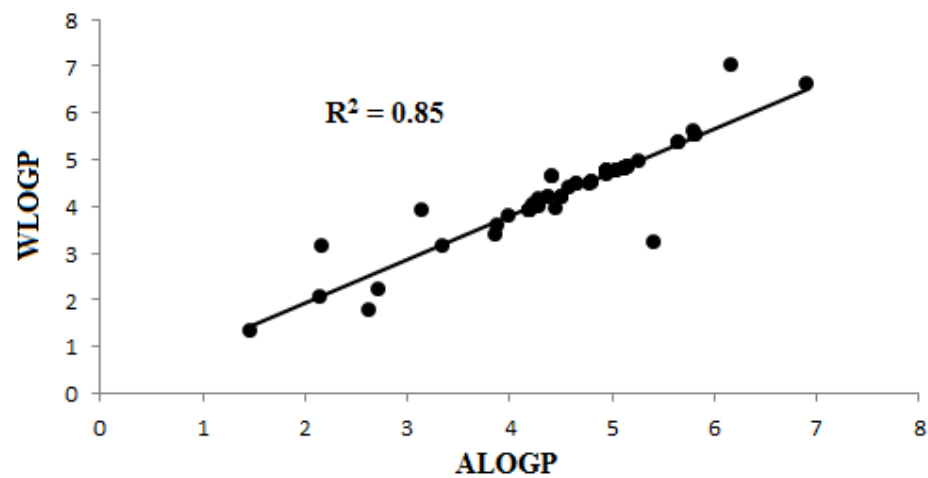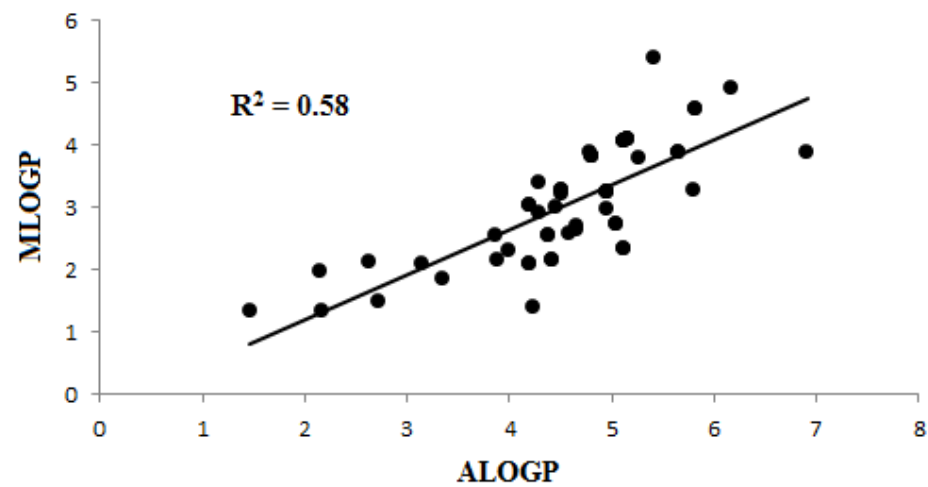

**Figure S1.** Correlation of the LogP values for Salubrinol and its analogues calculated by different methods (continued follows below).

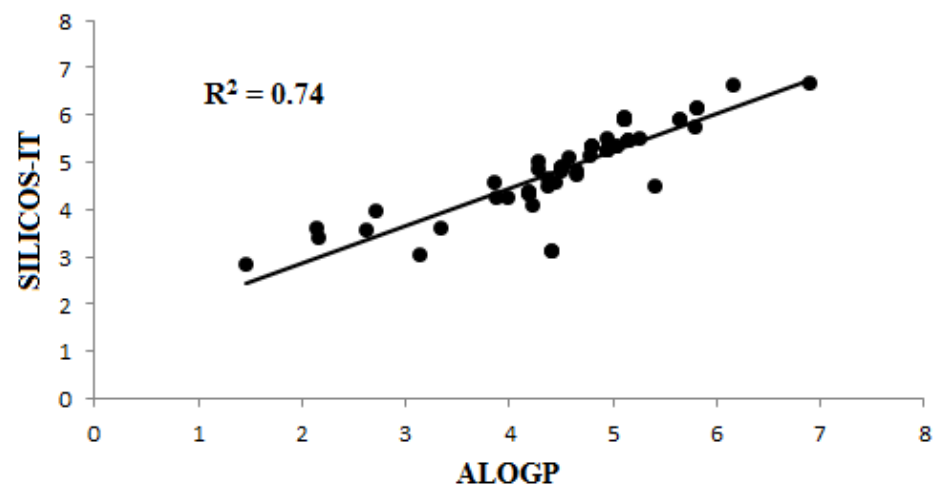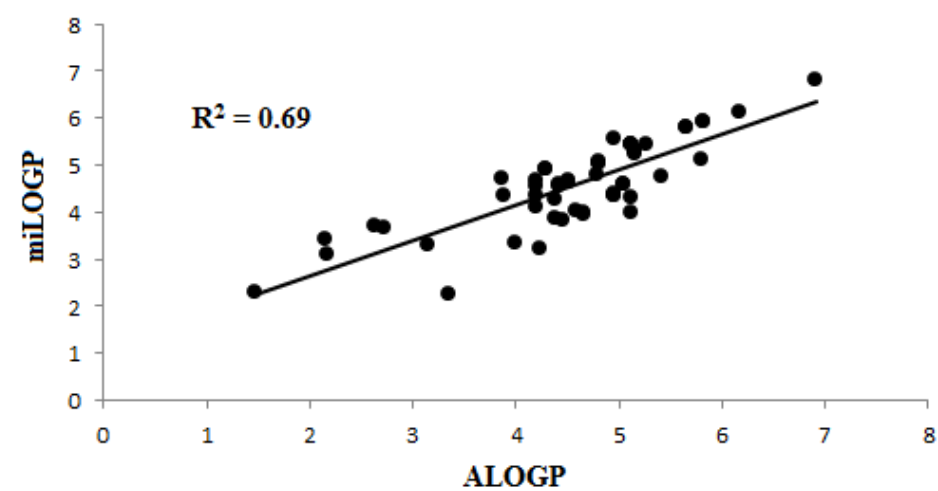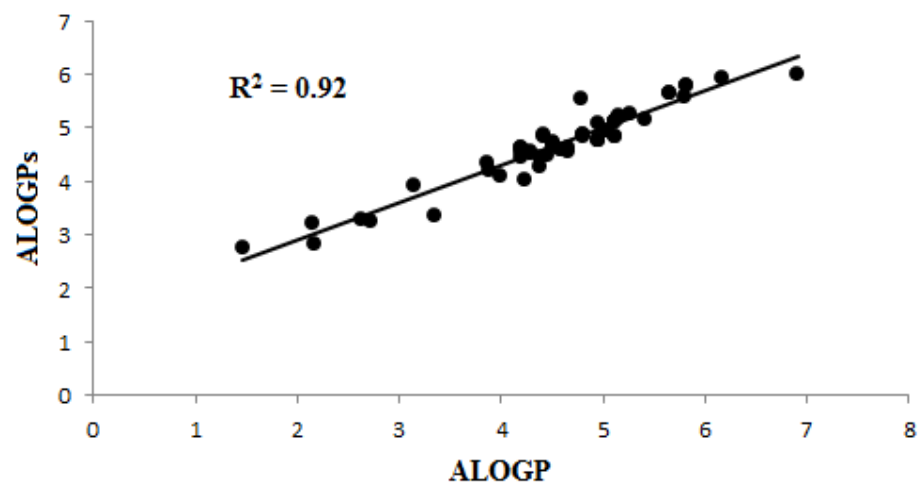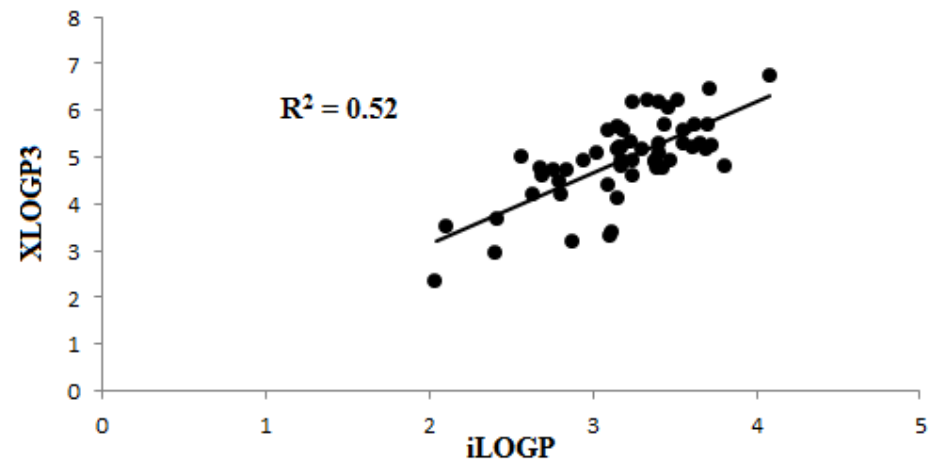

Figure S1. Cont.

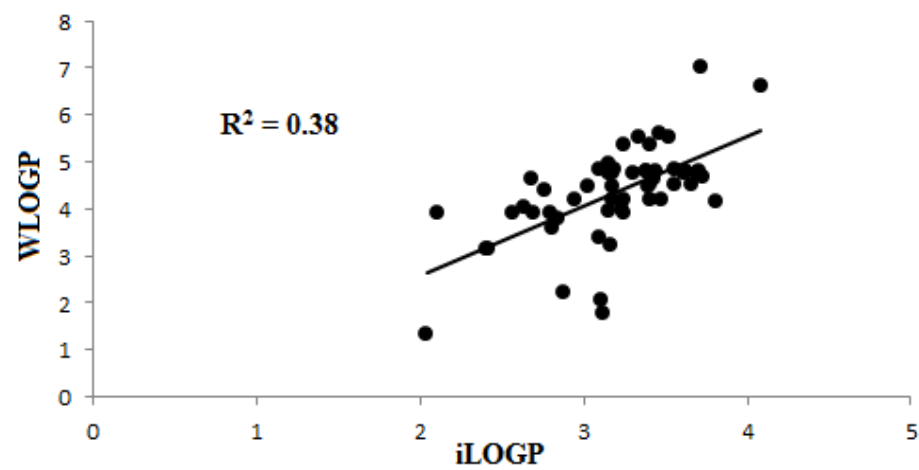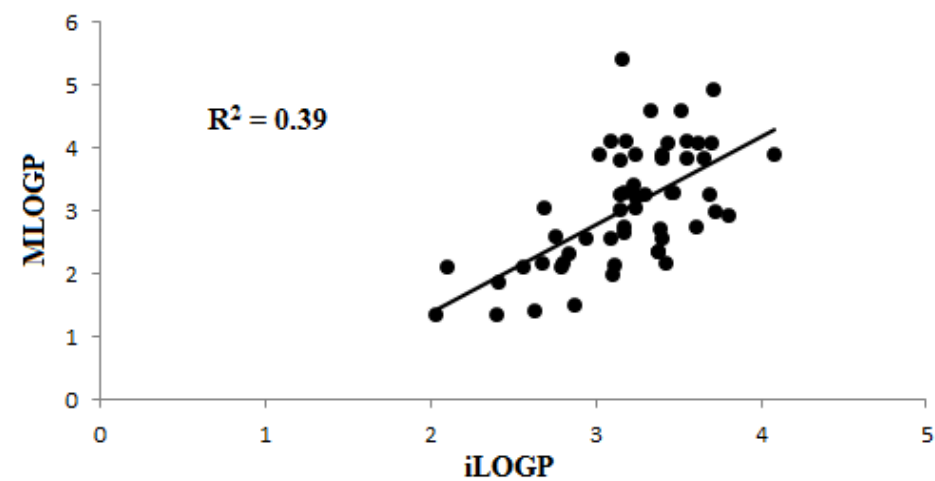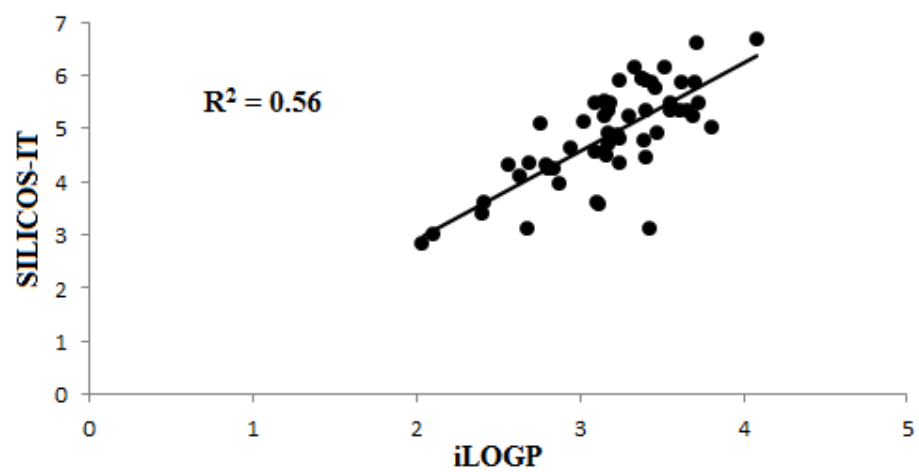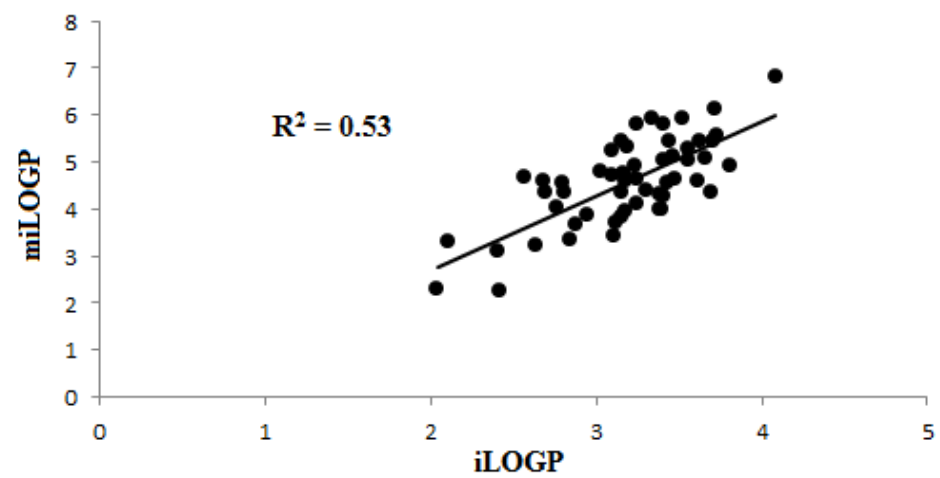

Figure S1. Cont.



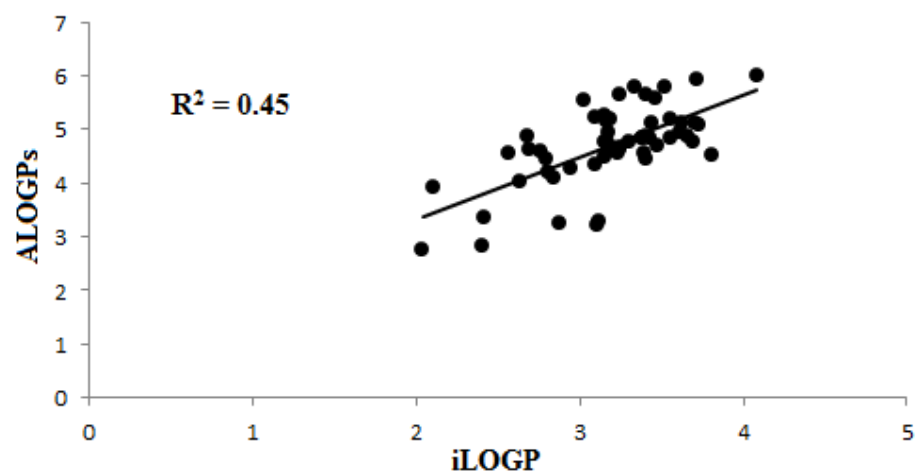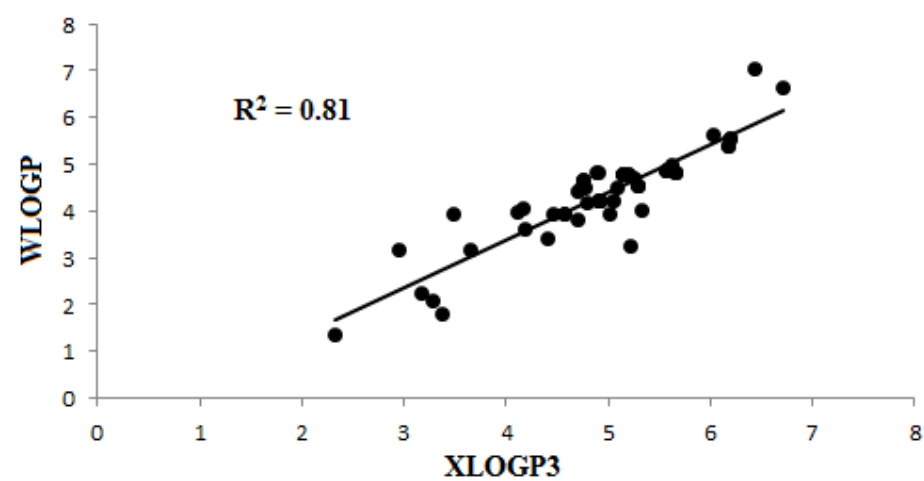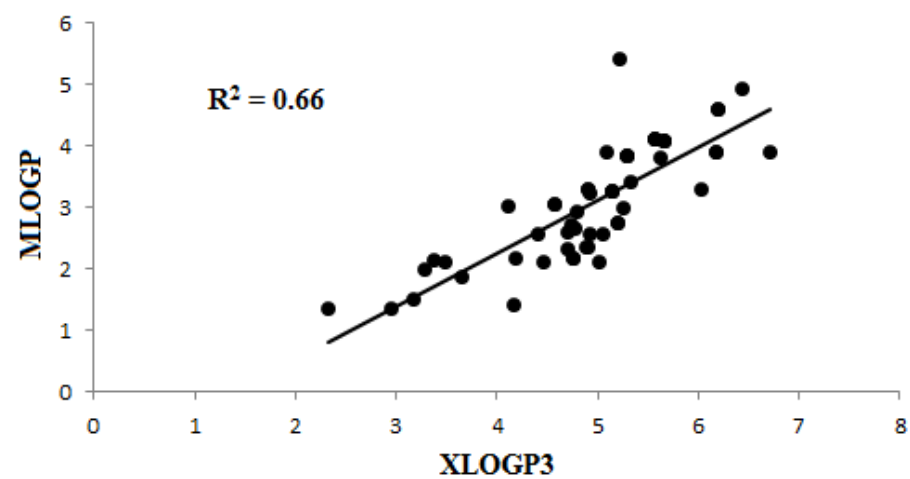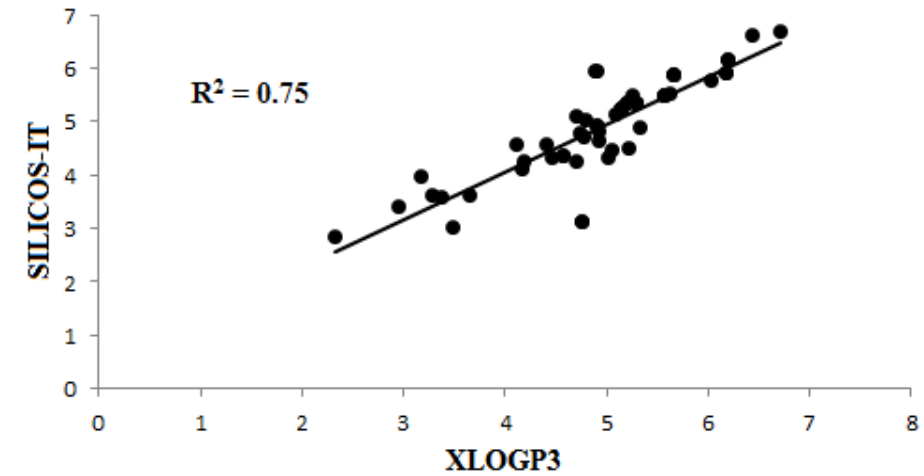

Figure S1. Cont.

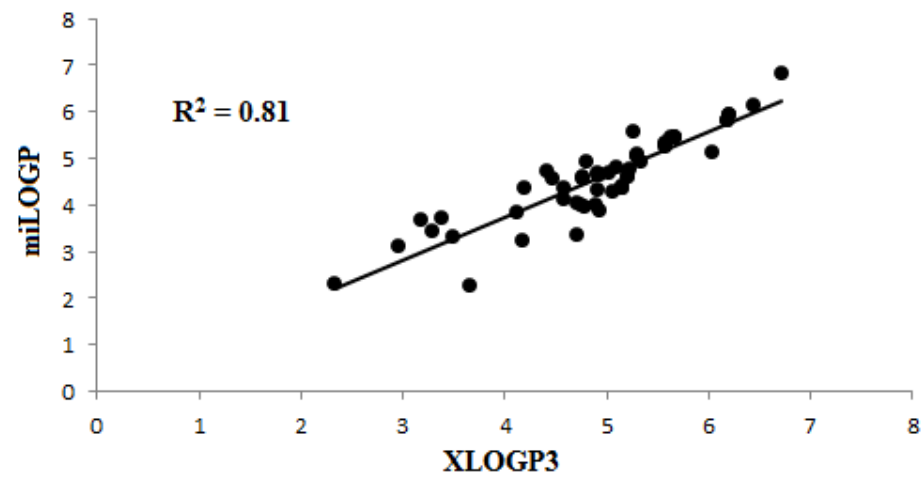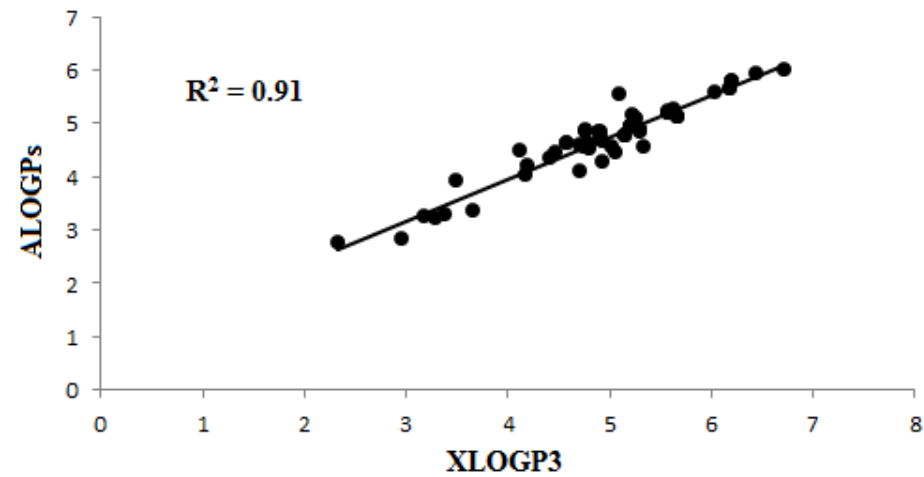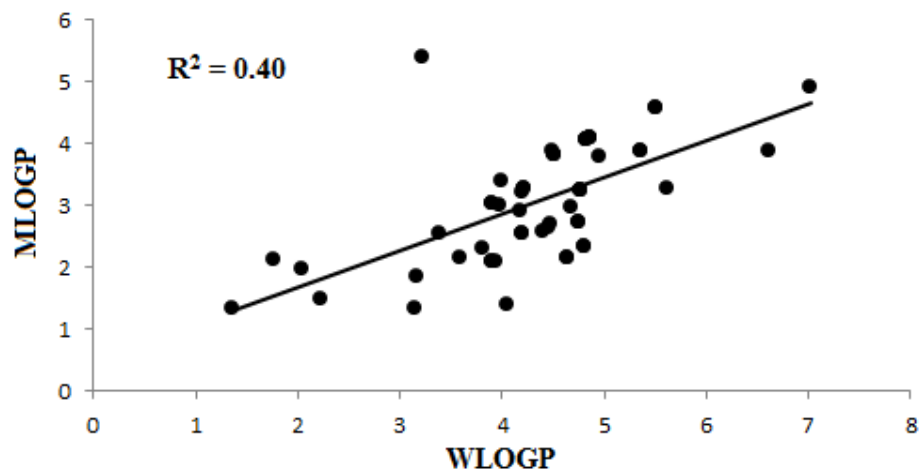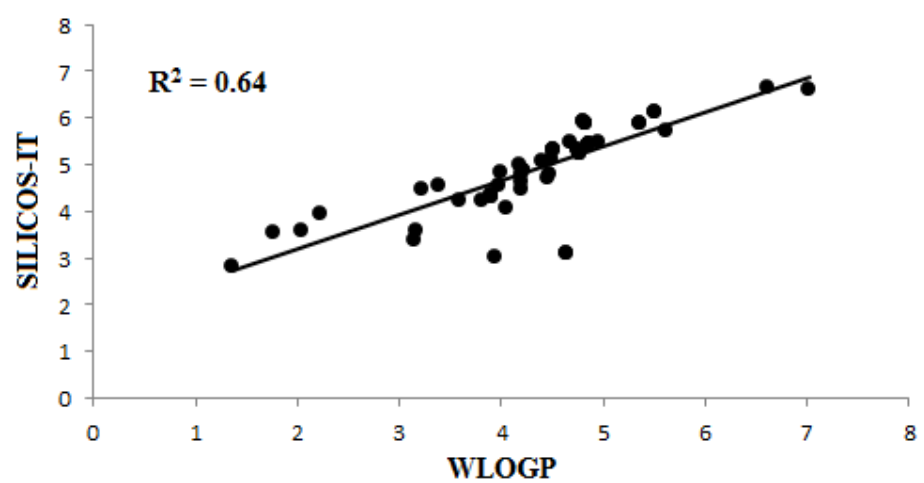

Figure S1. Cont.

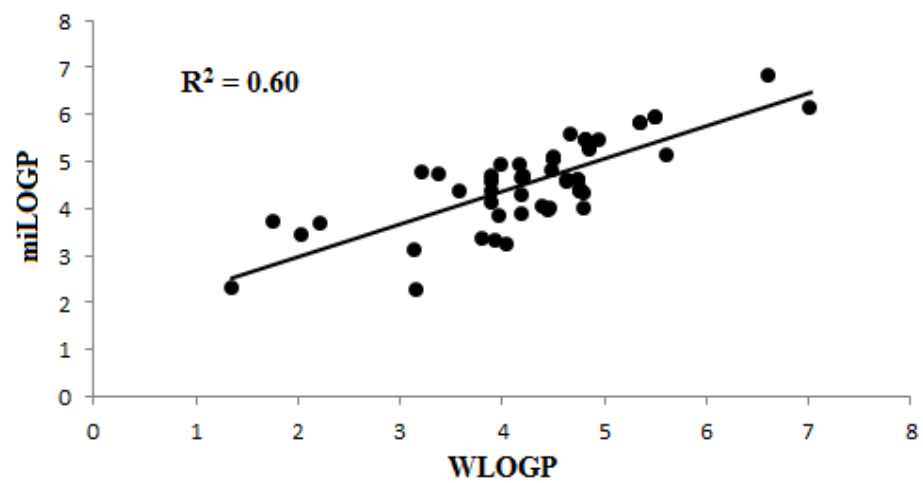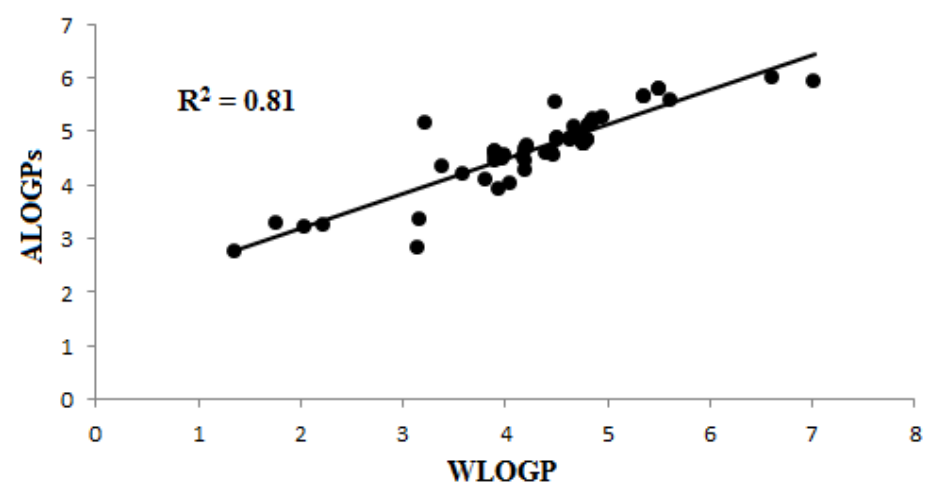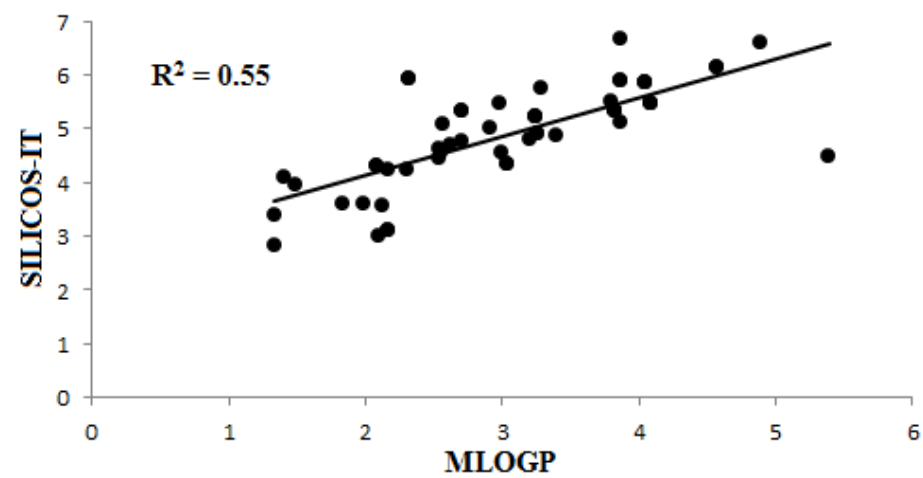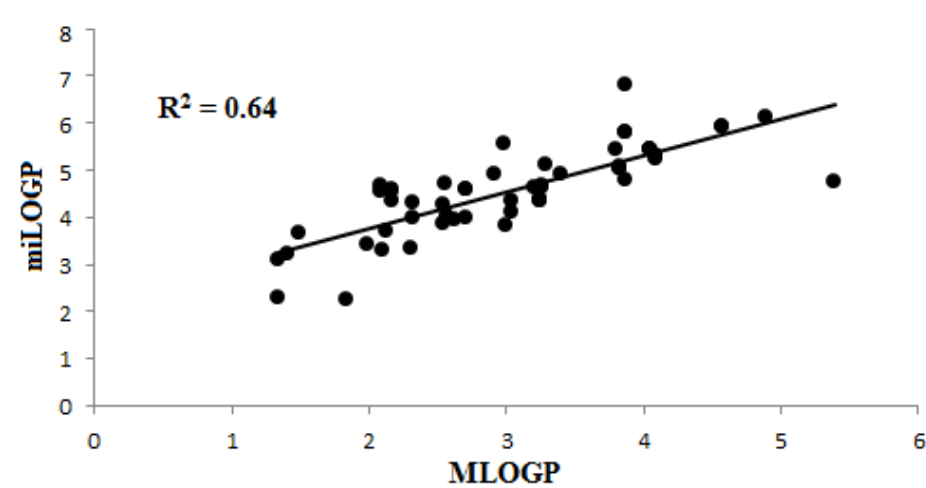

Figure S1. Cont.

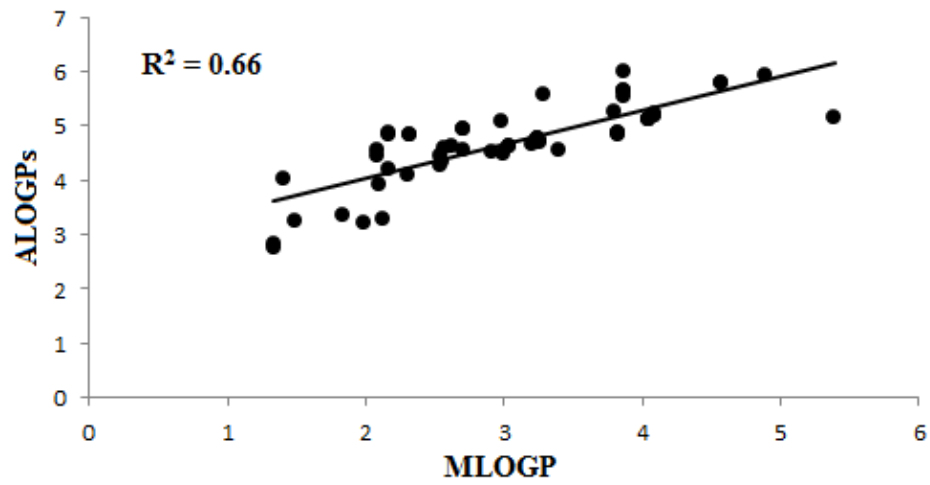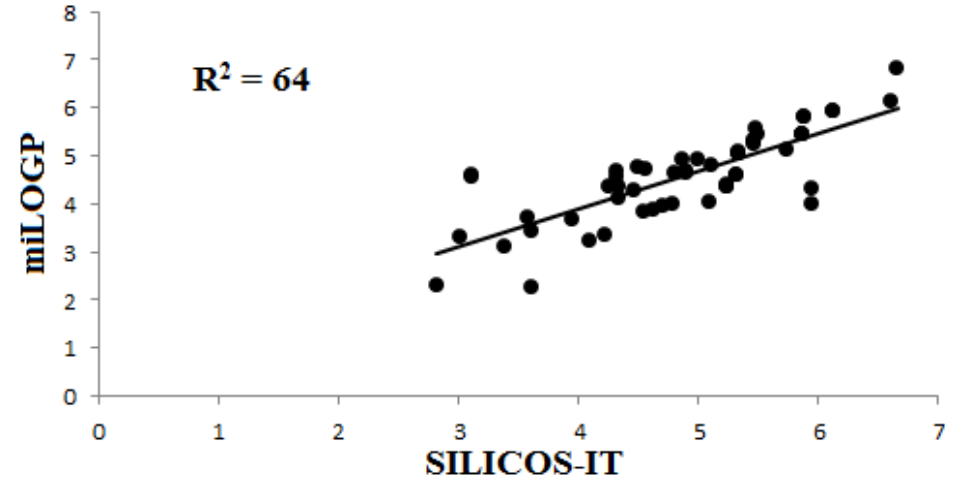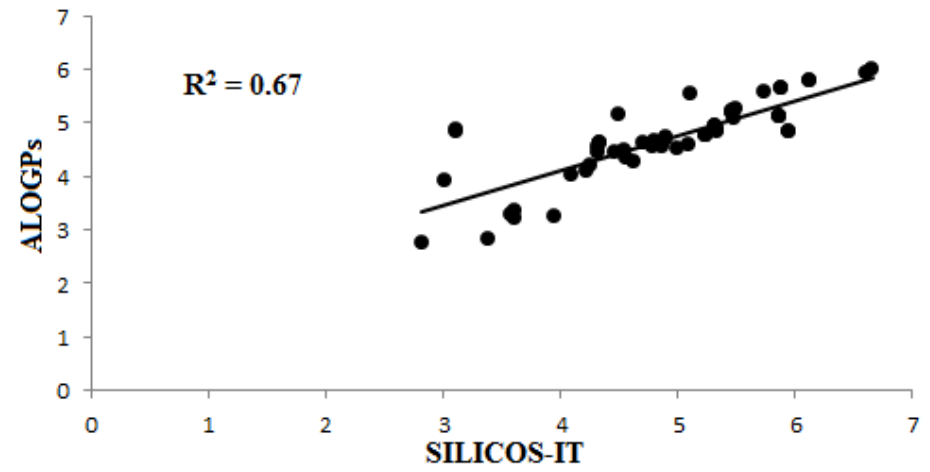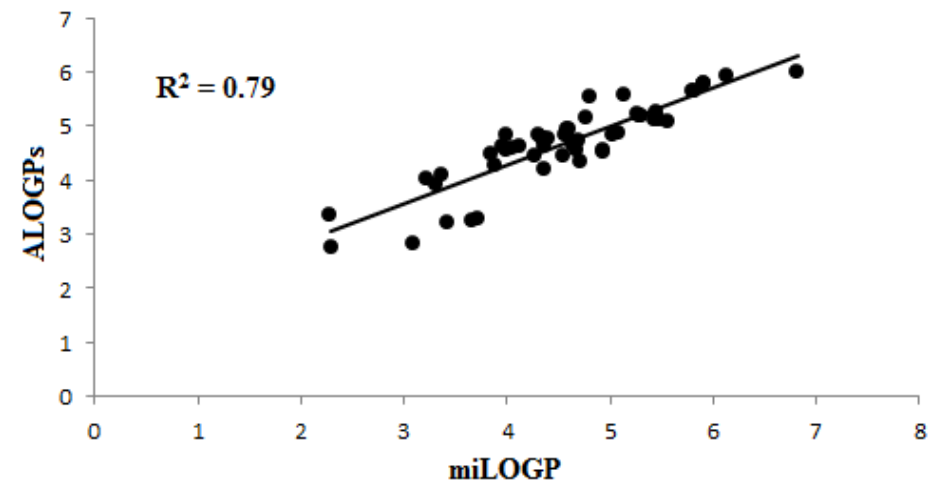

Figure S1. Cont.

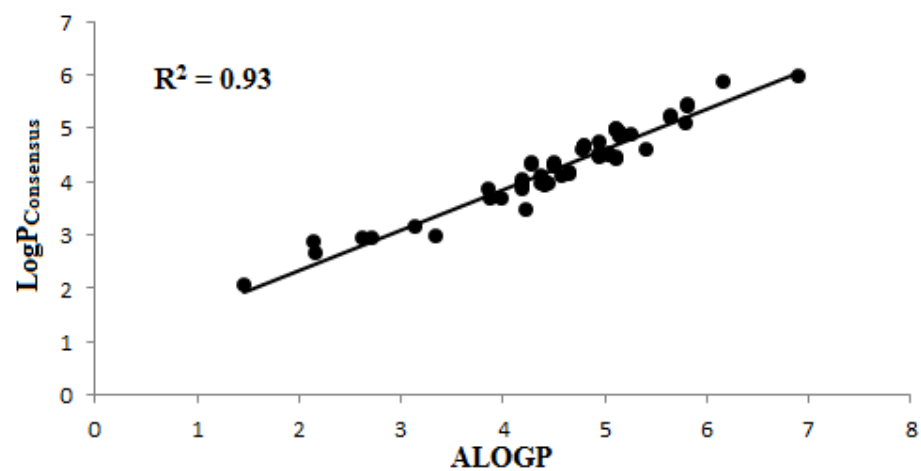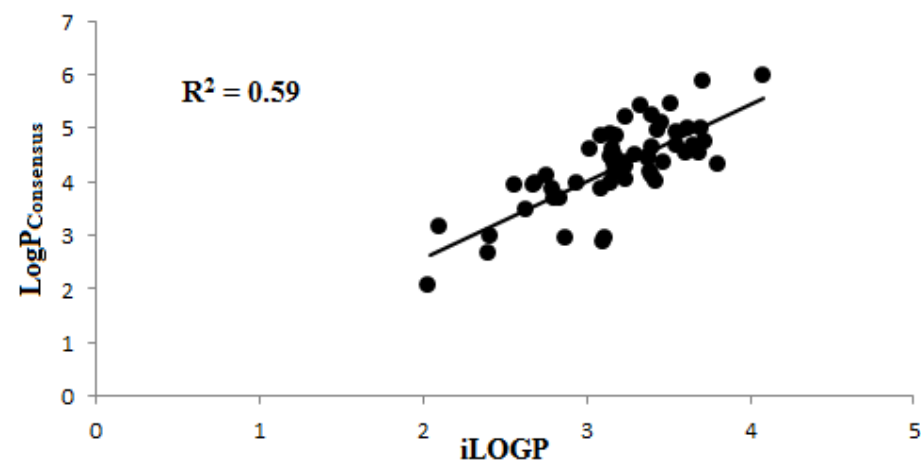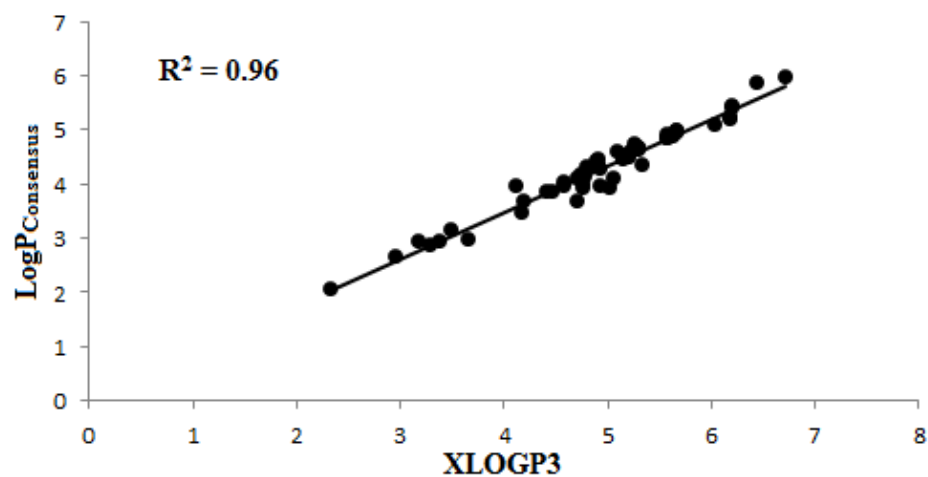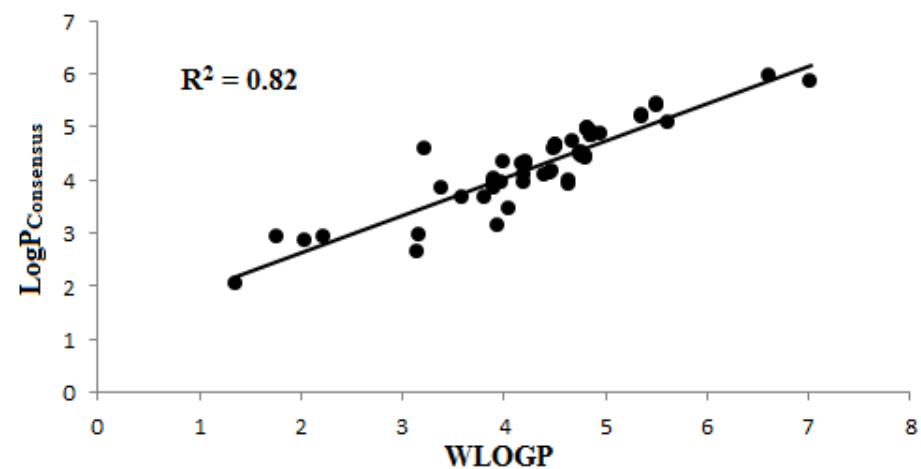

**Figure S2.** Correlation of the LogP values for Salubrinal and its analogues calculated by different methods with  $\text{LogP}_{\text{Consensus}}$  (continued follows below).

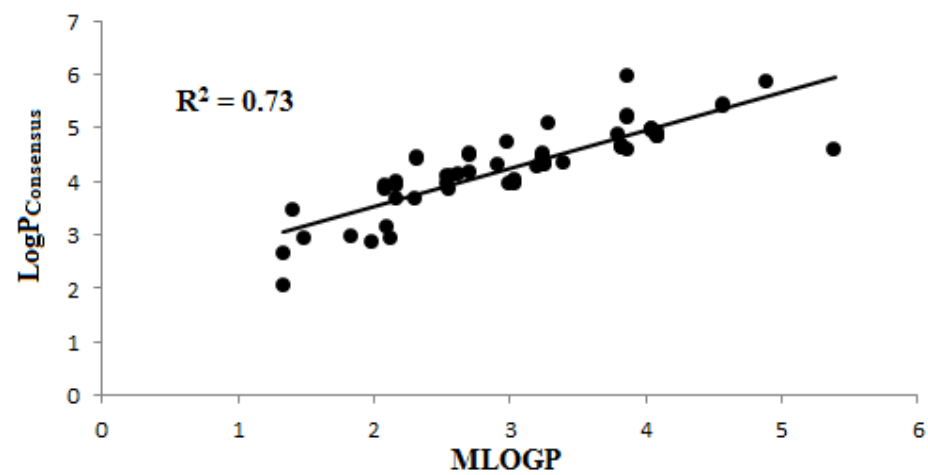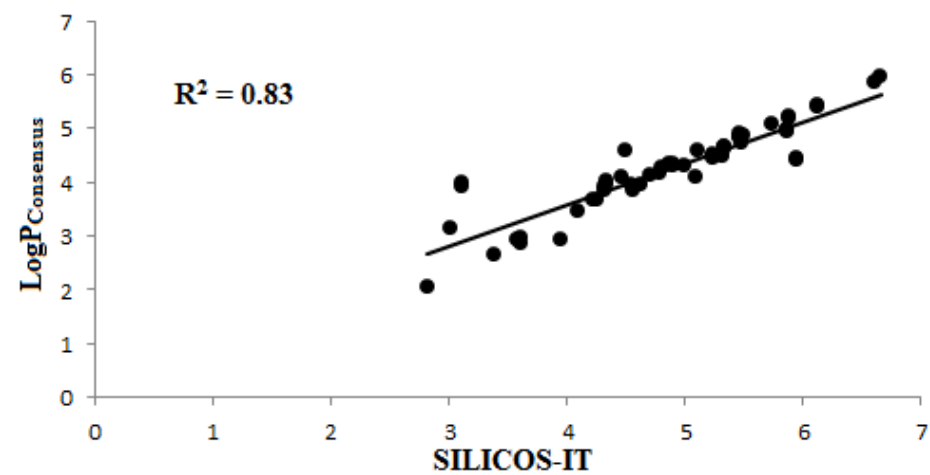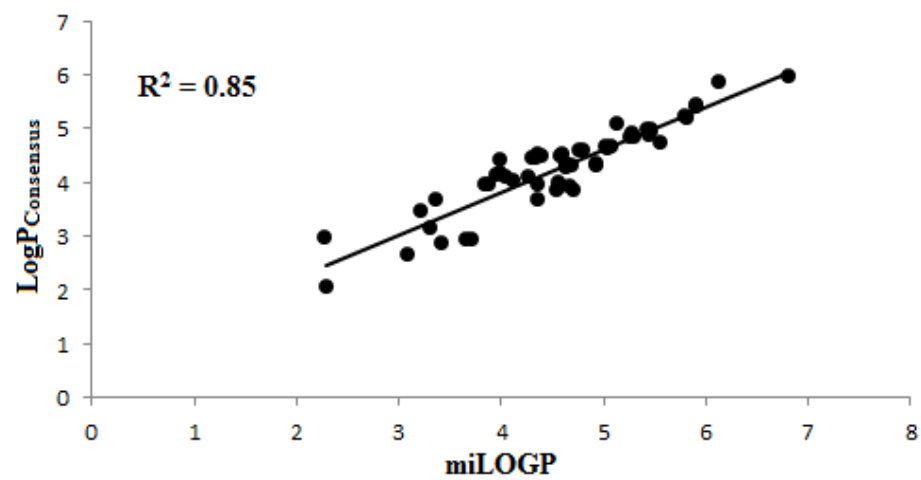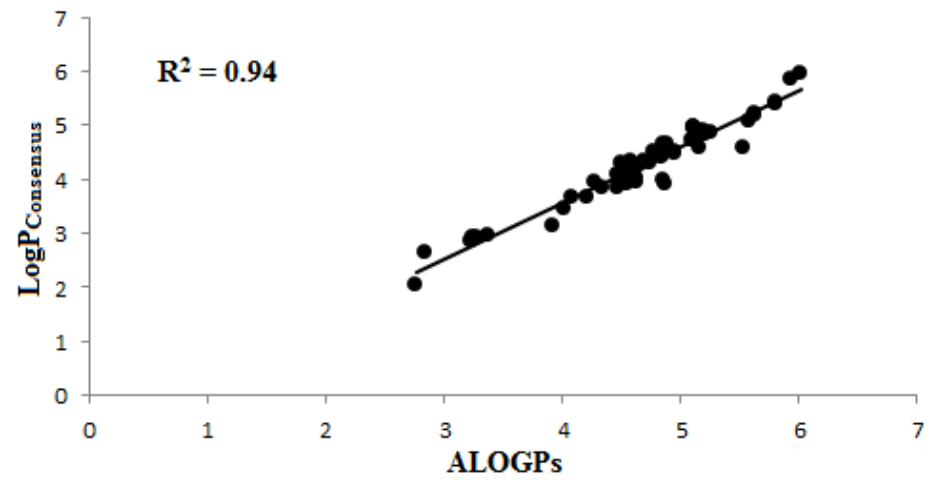

Figure S2. Cont.

**Table S6.** Calculation results of 2D PSA and 3D PSA by different methods.

| Comp. | 2D PSA (TPSA), Å <sup>2</sup> |                  | 3D PSA, Å <sup>2</sup> |                 |              |
|-------|-------------------------------|------------------|------------------------|-----------------|--------------|
|       | Molinspiration, N+O           | SwissADME, N+O+S | PyMol, N+O *           | PyMol, N+O+S ** | PyMol, Total |
| S1    | 66.04                         | 98.14            | 40.15                  | 69.78           | 454.76       |
| S2    | 66.04                         | 98.14            | 41.38                  | 72.02           | 461.29       |
| S3    | 53.15                         | 85.25            | 30.46                  | 60.17           | 463.64       |
| S4    | 53.15                         | 85.25            | 29.55                  | 60.74           | 466.96       |
| S5    | 96.25                         | 128.34           | 56.67                  | 84.08           | 392.14       |
| S6    | 79.46                         | 111.55           | 58.05                  | 85.72           | 405.76       |
| S7    | 91.48                         | 123.58           | 61.44                  | 89.34           | 550.49       |
| S8    | 53.15                         | 85.25            | 28.84                  | 56.65           | 411.63       |
| S9    | 53.15                         | 85.25            | 29.25                  | 57.56           | 430.94       |
| S10   | 53.15                         | 85.25            | 28.91                  | 57.58           | 426.97       |
| S11   | 53.15                         | 85.25            | 28.56                  | 57.27           | 431.02       |
| S12   | 53.15                         | 85.25            | 28.81                  | 56.96           | 451.16       |
| S13   | 53.15                         | 85.25            | 28.46                  | 56.60           | 454.71       |
| S14   | 53.15                         | 85.25            | 29.66                  | 58.61           | 453.74       |
| S15   | 73.38                         | 105.48           | 41.96                  | 70.63           | 423.24       |
| S16   | 73.38                         | 105.48           | 43.01                  | 71.70           | 426.06       |
| S17   | 53.15                         | 124.05           | 28.81                  | 83.09           | 435.62       |
| S18   | 62.39                         | 94.48            | 39.73                  | 68.41           | 446.38       |
| S19   | 62.39                         | 94.48            | 39.95                  | 68.78           | 442.33       |
| S20   | 90.45                         | 122.55           | 57.49                  | 85.86           | 441.50       |
| S21   | 90.45                         | 122.55           | 59.53                  | 88.08           | 442.54       |
| S22   | 79.46                         | 111.55           | 51.65                  | 80.13           | 461.60       |
| S23   | 98.98                         | 131.07           | 72.03                  | 101.18          | 440.33       |
| S24   | 98.98                         | 131.07           | 71.73                  | 100.34          | 441.74       |
| S25   | 53.15                         | 85.25            | 29.15                  | 57.58           | 427.18       |
| S26   | 53.15                         | 85.25            | 29.12                  | 57.51           | 429.53       |
| S27   | 53.15                         | 85.25            | 28.68                  | 57.34           | 428.63       |
| S28   | 53.15                         | 85.25            | 29.25                  | 57.61           | 429.84       |
| S29   | 53.15                         | 85.25            | 28.72                  | 57.17           | 443.03       |
| S30   | 53.15                         | 85.25            | 28.81                  | 57.40           | 436.74       |

| Comp. | 2D PSA (TPSA), Å <sup>2</sup> |                  | 3D PSA, Å <sup>2</sup> |                 |              |
|-------|-------------------------------|------------------|------------------------|-----------------|--------------|
|       | Molinspiration, N+O           | SwissADME, N+O+S | PyMol, N+O *           | PyMol, N+O+S ** | PyMol, Total |
| S31   | 53.15                         | 85.25            | 28.69                  | 56.87           | 469.19       |
| S32   | 82.25                         | 114.35           | 52.22                  | 80.83           | 467.46       |
| S33   | 77.88                         | 109.97           | 50.82                  | 79.21           | 523.10       |
| S34   | 113.32                        | 153.79           | 75.56                  | 110.44          | 475.67       |
| S35   | 66.04                         | 98.14            | 40.41                  | 69.08           | 404.84       |
| S36   | 66.04                         | 98.14            | 39.90                  | 68.30           | 443.89       |
| S37   | 87.29                         | 127.77           | 68.08                  | 102.54          | 436.96       |
| S38   | 44.36                         | 76.46            | 28.22                  | 58.87           | 416.23       |
| S39   | 53.60                         | 85.69            | 38.36                  | 68.78           | 409.86       |
| S40   | 47.60                         | 79.70            | 32.24                  | 62.40           | 432.94       |
| S41   | 66.04                         | 98.14            | 41.05                  | 69.92           | 361.18       |
| S42   | 66.04                         | 98.14            | 39.17                  | 69.36           | 402.87       |
| S43   | 66.04                         | 98.14            | 41.27                  | 69.65           | 422.64       |
| S44   | 66.04                         | 98.14            | 38.67                  | 68.58           | 421.36       |
| S45   | 66.04                         | 98.14            | 39.11                  | 70.02           | 444.94       |
| S46   | 66.04                         | 98.14            | 43.06                  | 72.74           | 425.00       |
| S47   | 66.04                         | 98.14            | 42.90                  | 71.77           | 445.23       |
| S48   | 66.04                         | 98.14            | 44.33                  | 72.69           | 444.57       |
| S49   | 66.04                         | 98.14            | 42.92                  | 71.57           | 441.58       |
| S50   | 66.04                         | 98.14            | 43.98                  | 73.17           | 447.34       |
| S51   | 75.28                         | 107.37           | 53.79                  | 83.18           | 453.79       |
| S52   | 66.04                         | 98.14            | 43.52                  | 72.41           | 470.87       |
| S53   | 79.18                         | 111.28           | 51.83                  | 81.98           | 411.56       |
| S54   | 66.04                         | 126.38           | 39.60                  | 91.55           | 452.03       |
| S55   | 66.04                         | 126.38           | 40.21                  | 93.48           | 450.56       |

\* For the calculation, we used the following commands:

*set dot\_density, 4*

*set dot\_solvent, off*

*get\_area elem N+O;*

\*\* For the calculation, we used the following commands:

*set dot\_density,*

*set dot\_solvent, off*

*get\_area elem N+O+S;*



**Table S7.** Prediction results of the inhibitory and substrate activity of Salubrinal and its analogues concerning the transmembrane transporter P-gp.

| Comp. | ADMETLab  |       |           |       | admetSAR 2.0 * |       |           |       | Vienna LiverTox |       |           |       | AutoDock Vina,<br>ΔG (kcal/mol) |
|-------|-----------|-------|-----------|-------|----------------|-------|-----------|-------|-----------------|-------|-----------|-------|---------------------------------|
|       | inhibitor |       | substrate |       | inhibitor      |       | substrate |       | inhibitor       |       | substrate |       |                                 |
|       | result    | prob. | result    | prob. | result         | prob. | result    | prob. | result          | score | result    | score |                                 |
| S1    | ++        | 0.763 | ---       | 0.098 | -              | 0.471 | -         | 0.742 | +               | 0.560 | -         | 0.030 | -9.3                            |
| S2    | ++        | 0.795 | ---       | 0.097 | -              | 0.515 | -         | 0.701 | -               | 0.460 | -         | 0.120 | -9.0                            |
| S3    | ++        | 0.772 | ---       | 0.158 | -              | 0.500 | -         | 0.805 | -               | 0.420 | -         | 0.220 | -10.2                           |
| S4    | ++        | 0.874 | ---       | 0.055 | -              | 0.531 | -         | 0.874 | -               | 0.410 | -         | 0.220 | -10.2                           |
| S5    | +         | 0.644 | -         | 0.341 | -              | 0.805 | -         | 0.733 | -               | 0.120 | -         | 0.430 | -8.7                            |
| S6    | ++        | 0.754 | ---       | 0.130 | -              | 0.704 | -         | 0.778 | -               | 0.210 | -         | 0.120 | -8.3                            |
| S7    | ++        | 0.850 | ---       | 0.195 | -              | 0.453 | +         | 0.527 | -               | 0.400 | -         | 0.410 | -8.0                            |
| S8    | ++        | 0.761 | ---       | 0.076 | -              | 0.707 | -         | 0.906 | -               | 0.200 | -         | 0.030 | -8.9                            |
| S9    | ++        | 0.757 | ---       | 0.185 | -              | 0.601 | -         | 0.794 | -               | 0.360 | -         | 0.030 | -9.0                            |
| S10   | ++        | 0.851 | ---       | 0.175 | -              | 0.578 | -         | 0.769 | -               | 0.250 | -         | 0.030 | -9.4                            |
| S11   | ++        | 0.847 | ---       | 0.144 | -              | 0.605 | -         | 0.867 | -               | 0.390 | -         | 0.030 | -9.3                            |
| S12   | ++        | 0.784 | -         | 0.339 | -              | 0.506 | -         | 0.720 | -               | 0.430 | -         | 0.120 | -9.3                            |
| S13   | ++        | 0.840 | ---       | 0.180 | -              | 0.562 | -         | 0.764 | -               | 0.460 | -         | 0.120 | -9.2                            |
| S14   | ++        | 0.777 | ---       | 0.177 | -              | 0.491 | -         | 0.790 | -               | 0.430 | -         | 0.120 | -9.1                            |
| S15   | +         | 0.578 | ---       | 0.207 | -              | 0.702 | -         | 0.822 | -               | 0.210 | -         | 0.320 | -9.1                            |
| S16   | +         | 0.651 | ---       | 0.123 | -              | 0.669 | -         | 0.742 | -               | 0.140 | -         | 0.320 | -9.3                            |
| S17   | ++        | 0.809 | ---       | 0.069 | -              | 0.659 | -         | 0.822 | -               | 0.350 | -         | 0.130 | -8.7                            |
| S18   | ++        | 0.844 | ---       | 0.137 | -              | 0.533 | -         | 0.751 | -               | 0.480 | -         | 0.030 | -8.7                            |
| S19   | +++       | 0.900 | ---       | 0.034 | -              | 0.573 | -         | 0.858 | -               | 0.300 | -         | 0.120 | -9.1                            |
| S20   | ++        | 0.733 | ---       | 0.158 | -              | 0.627 | -         | 0.839 | -               | 0.420 | -         | 0.240 | -9.9                            |
| S21   | ++        | 0.766 | ---       | 0.108 | -              | 0.660 | -         | 0.851 | -               | 0.290 | -         | 0.240 | -9.3                            |
| S22   | +++       | 0.908 | ---       | 0.125 | -              | 0.478 | -         | 0.787 | +               | 0.650 | -         | 0.120 | -8.7                            |
| S23   | ++        | 0.783 | ---       | 0.080 | -              | 0.633 | -         | 0.751 | -               | 0.410 | -         | 0.120 | -9.7                            |
| S24   | ++        | 0.792 | ---       | 0.052 | -              | 0.642 | -         | 0.863 | -               | 0.350 | -         | 0.020 | -9.5                            |
| S25   | ++        | 0.753 | ---       | 0.089 | -              | 0.633 | -         | 0.862 | -               | 0.340 | -         | 0.010 | -8.8                            |
| S26   | ++        | 0.818 | ---       | 0.115 | -              | 0.625 | -         | 0.789 | -               | 0.290 | -         | 0.100 | -9.4                            |
| S27   | ++        | 0.855 | ---       | 0.052 | -              | 0.630 | -         | 0.910 | -               | 0.310 | -         | 0.100 | -9.0                            |
| S28   | ++        | 0.851 | ---       | 0.060 | -              | 0.649 | -         | 0.891 | -               | 0.240 | -         | 0.120 | -9.1                            |

| Comp. | ADMETLab  |       |           |       | admetSAR 2.0 * |       |           |       | Vienna LiverTox |       |           |       | AutoDock Vina,<br>ΔG (kcal/mol) |
|-------|-----------|-------|-----------|-------|----------------|-------|-----------|-------|-----------------|-------|-----------|-------|---------------------------------|
|       | inhibitor |       | substrate |       | inhibitor      |       | substrate |       | inhibitor       |       | substrate |       |                                 |
|       | result    | prob. | result    | prob. | result         | prob. | result    | prob. | result          | score | result    | score |                                 |
| S29   | ++        | 0.849 | ---       | 0.071 | -              | 0.606 | -         | 0.854 | -               | 0.470 | -         | 0.100 | -9.4                            |
| S30   | ++        | 0.871 | ---       | 0.076 | -              | 0.600 | -         | 0.835 | -               | 0.430 | -         | 0.100 | -9.2                            |
| S31   | +++       | 0.913 | ---       | 0.088 | -              | 0.500 | -         | 0.749 | +               | 0.580 | -         | 0.280 | -9.2                            |
| S32   | ++        | 0.784 | ---       | 0.191 | -              | 0.493 | -         | 0.785 | -               | 0.210 | -         | 0.220 | -9.0                            |
| S33   | ++        | 0.801 | ---       | 0.081 | +              | 0.634 | -         | 0.867 | -               | 0.270 | -         | 0.120 | -9.2                            |
| S34   | +         | 0.644 | ---       | 0.060 | -              | 0.569 | -         | 0.838 | -               | 0.360 | -         | 0.330 | -9.3                            |
| S35   | +         | 0.601 | ---       | 0.154 | -              | 0.728 | -         | 0.811 | -               | 0.210 | -         | 0.020 | -9.0                            |
| S36   | +++       | 0.921 | ---       | 0.105 | -              | 0.640 | -         | 0.727 | +               | 0.570 | -         | 0.020 | -9.1                            |
| S37   | ++        | 0.787 | ---       | 0.209 | -              | 0.725 | -         | 0.681 | -               | 0.330 | -         | 0.220 | -9.0                            |
| S38   | ++        | 0.785 | ---       | 0.166 | -              | 0.666 | -         | 0.795 | -               | 0.260 | -         | 0.010 | -8.5                            |
| S39   | ++        | 0.785 | -         | 0.307 | -              | 0.640 | -         | 0.762 | -               | 0.160 | -         | 0.010 | -8.4                            |
| S40   | ++        | 0.842 | +         | 0.521 | -              | 0.630 | -         | 0.618 | -               | 0.220 | -         | 0.110 | -8.5                            |
| S41   | +         | 0.506 | ---       | 0.069 | -              | 0.806 | -         | 0.660 | -               | 0.290 | -         | 0.010 | -8.2                            |
| S42   | +         | 0.553 | ---       | 0.075 | -              | 0.713 | -         | 0.663 | -               | 0.430 | -         | 0.010 | -7.9                            |
| S43   | +         | 0.545 | ---       | 0.086 | -              | 0.683 | -         | 0.560 | -               | 0.410 | -         | 0.010 | -7.9                            |
| S44   | +         | 0.508 | ---       | 0.083 | -              | 0.727 | -         | 0.664 | -               | 0.320 | -         | 0.010 | -8.3                            |
| S45   | +         | 0.647 | ---       | 0.076 | -              | 0.450 | -         | 0.727 | +               | 0.750 | -         | 0.030 | -9.5                            |
| S46   | +         | 0.553 | ---       | 0.067 | -              | 0.528 | -         | 0.736 | -               | 0.440 | -         | 0.010 | -8.9                            |
| S47   | ++        | 0.724 | ---       | 0.104 | -              | 0.507 | -         | 0.607 | +               | 0.530 | -         | 0.010 | -9.2                            |
| S48   | ++        | 0.769 | ---       | 0.062 | -              | 0.481 | -         | 0.588 | +               | 0.630 | -         | 0.010 | -9.5                            |
| S49   | ++        | 0.760 | ---       | 0.113 | -              | 0.434 | -         | 0.623 | +               | 0.730 | -         | 0.010 | -9.3                            |
| S50   | ++        | 0.759 | ---       | 0.049 | -              | 0.453 | -         | 0.681 | +               | 0.580 | -         | 0.030 | -9.0                            |
| S51   | ++        | 0.822 | ---       | 0.032 | +              | 0.597 | -         | 0.572 | +               | 0.660 | -         | 0.010 | -9.4                            |
| S52   | ++        | 0.759 | ---       | 0.049 | +              | 0.624 | -         | 0.650 | +               | 0.700 | -         | 0.400 | -10.6                           |
| S53   | +         | 0.623 | ---       | 0.074 | -              | 0.595 | -         | 0.655 | +               | 0.570 | -         | 0.000 | -8.4                            |
| S54   | ++        | 0.725 | ---       | 0.041 | -              | 0.500 | -         | 0.691 | +               | 0.560 | -         | 0.020 | -9.0                            |
| S55   | ++        | 0.811 | ---       | 0.077 | -              | 0.515 | -         | 0.647 | +               | 0.570 | -         | 0.020 | -8.8                            |

\* The obtained values of the probability for the unification of the results were rounded to thousandths.

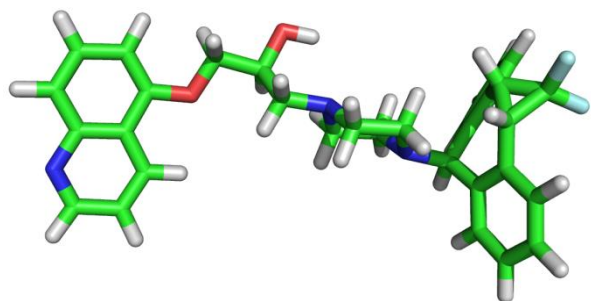

**Zosuquidar**  
 $\Delta G = -143467.0 \text{ kcal/mol}$

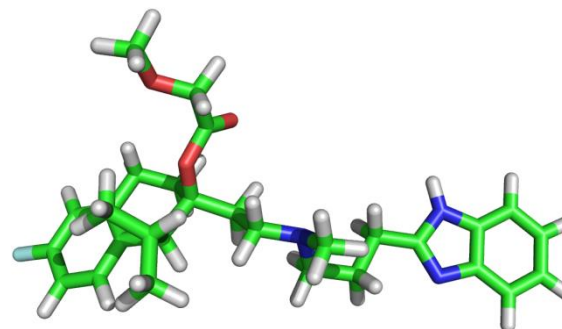

**Mibefradil**  
 $\Delta G = -134440.7 \text{ kcal/mol}$

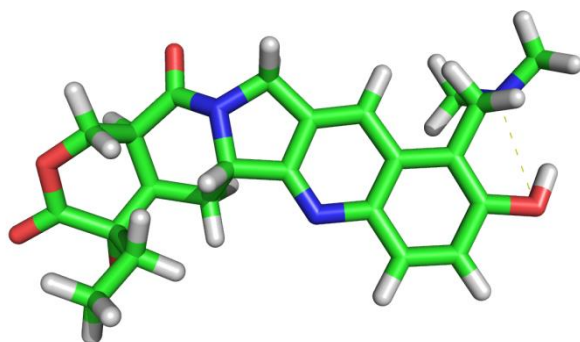

**Topotecan**  
 $\Delta G = -117544.3 \text{ kcal/mol}$

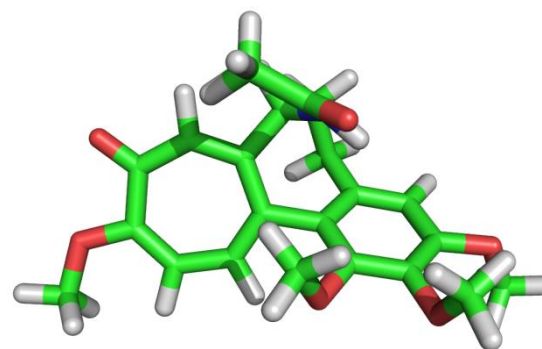

**Colchicin**  
 $\Delta G = -113309.8 \text{ kcal/mol}$

**Figure S3.** Zosuquidar, Mibefradil, Topotecan and Colchicin structures optimized using the semi-empirical PM3 method in the ArgusLab 4.0.1 software package.

**Table S8.** Results of *in silico* analysis of the distribution of Salubrinal and its analogues in the body.

| Comp. | Volume Distribution (V <sub>dss</sub> ) |       |                    |       | PPB (Plasma Protein Binding), % |              | AutoDock Vina, ΔG (kcal/mol) |        |        |      | BBB (Blood–Brain Barrier) |       |                 |       |               |
|-------|-----------------------------------------|-------|--------------------|-------|---------------------------------|--------------|------------------------------|--------|--------|------|---------------------------|-------|-----------------|-------|---------------|
|       | ADMETLab                                |       | pkCSM              |       | ADMETLab                        | admetSAR 2.0 | HAS *                        |        | AGP ** |      | ADMETLab                  |       | admetSAR2.0 *** |       | pkCSM, Log BB |
|       | Log V <sub>d</sub>                      | L/kg  | Log V <sub>d</sub> | L/kg  |                                 |              | Site 1                       | Site 2 | A      | F1*S | result                    | prob. | result          | prob. |               |
|       |                                         |       |                    |       |                                 |              |                              |        |        |      |                           |       |                 |       |               |
| S1    | −0.379                                  | 0.418 | 0.123              | 1.327 | 94.830                          | 1.184        | −9.8                         | −9.9   | −9.9   | −9.5 | ++                        | 0.843 | +               | 0.973 | −0.063        |
| S2    | −0.342                                  | 0.455 | 0.130              | 1.349 | 94.946                          | 1.143        | −9.4                         | −10.2  | −8.9   | −9.8 | ++                        | 0.863 | +               | 0.974 | 0.028         |
| S3    | −0.279                                  | 0.526 | 0.003              | 1.007 | 93.248                          | 1.126        | −9.9                         | −10.1  | −8.9   | −9.8 | +++                       | 0.962 | +               | 0.975 | 0.086         |
| S4    | −0.302                                  | 0.499 | 0.008              | 1.019 | 94.064                          | 1.178        | −10.2                        | −10.6  | −9.1   | −9.9 | +++                       | 0.961 | +               | 0.975 | 0.033         |
| S5    | −0.746                                  | 0.179 | −0.517             | 0.304 | 73.802                          | 1.043        | −7.5                         | −8.2   | −7.5   | −8.6 | +++                       | 0.984 | +               | 0.976 | −1.095        |
| S6    | −0.884                                  | 0.131 | −0.530             | 0.295 | 78.081                          | 0.967        | −7.6                         | −7.9   | −7.9   | −7.8 | +++                       | 0.992 | +               | 0.975 | −1.160        |
| S7    | −0.970                                  | 0.107 | −0.518             | 0.303 | 83.535                          | 1.215        | −8.1                         | −8.8   | −8.6   | −8.1 | +++                       | 0.982 | +               | 0.975 | 0.004         |
| S8    | −0.315                                  | 0.484 | 0.033              | 1.079 | 91.112                          | 1.104        | −8.5                         | −9.1   | −8.7   | −8.8 | +++                       | 0.985 | +               | 0.976 | 0.036         |
| S9    | −0.327                                  | 0.471 | 0.220              | 1.660 | 91.936                          | 1.122        | −8.7                         | −9.5   | −8.6   | −9.1 | +++                       | 0.964 | +               | 0.974 | 0.096         |
| S10   | −0.326                                  | 0.472 | 0.030              | 1.072 | 91.609                          | 1.041        | −8.8                         | −9.6   | −8.5   | −9.1 | +++                       | 0.962 | +               | 0.975 | 0.001         |
| S11   | −0.336                                  | 0.461 | −0.004             | 0.991 | 91.771                          | 1.044        | −8.4                         | −9.3   | −8.5   | −9.0 | +++                       | 0.972 | +               | 0.975 | 0.027         |
| S12   | −0.237                                  | 0.579 | 0.132              | 1.355 | 92.003                          | 1.213        | −9.0                         | −9.9   | −8.8   | −9.6 | +++                       | 0.960 | +               | 0.974 | −0.015        |
| S13   | −0.253                                  | 0.558 | 0.092              | 1.236 | 91.785                          | 1.063        | −8.9                         | −9.8   | −8.7   | −9.4 | +++                       | 0.929 | +               | 0.974 | −0.013        |
| S14   | −0.253                                  | 0.558 | 0.105              | 1.274 | 91.509                          | 1.071        | −9.0                         | −9.7   | −8.9   | −9.6 | +++                       | 0.929 | +               | 0.974 | 0.005         |
| S15   | −1.099                                  | 0.080 | −0.017             | 0.962 | 90.919                          | 1.169        | −8.3                         | −9.3   | −8.2   | −8.8 | ++                        | 0.833 | +               | 0.973 | −1.241        |
| S16   | −0.907                                  | 0.124 | −0.217             | 0.607 | 91.411                          | 1.100        | −9.0                         | −9.2   | −8.3   | −8.8 | ++                        | 0.858 | +               | 0.976 | −1.238        |
| S17   | −0.476                                  | 0.334 | 0.189              | 1.545 | 90.705                          | 1.121        | −8.5                         | −9.0   | −8.0   | −8.4 | +++                       | 0.943 | +               | 0.974 | 0.079         |
| S18   | −0.516                                  | 0.305 | 0.069              | 1.172 | 90.894                          | 1.001        | −8.8                         | −9.3   | −8.2   | −8.9 | +++                       | 0.943 | +               | 0.974 | −0.028        |
| S19   | −0.511                                  | 0.308 | −0.150             | 0.708 | 90.536                          | 0.983        | −8.7                         | −9.2   | −8.1   | −8.8 | +++                       | 0.961 | +               | 0.976 | −0.109        |
| S20   | −1.382                                  | 0.042 | −0.592             | 0.256 | 91.421                          | 1.253        | −9.1                         | −9.4   | −8.7   | −9.0 | ++                        | 0.725 | +               | 0.969 | −1.364        |
| S21   | −1.301                                  | 0.050 | −0.723             | 0.189 | 91.148                          | 1.167        | −8.7                         | −9.6   | −8.5   | −9.5 | ++                        | 0.841 | +               | 0.972 | −1.424        |
| S22   | −0.961                                  | 0.109 | −0.234             | 0.583 | 91.812                          | 1.021        | −8.3                         | −9.3   | −8.8   | −8.7 | +++                       | 0.937 | +               | 0.972 | −1.297        |
| S23   | −0.916                                  | 0.121 | −0.172             | 0.673 | 91.501                          | 1.083        | −8.9                         | −9.5   | −8.6   | −9.4 | +++                       | 0.931 | +               | 0.974 | −1.141        |
| S24   | −0.917                                  | 0.121 | −0.184             | 0.655 | 91.593                          | 1.123        | −8.7                         | −9.7   | −8.5   | −8.8 | +++                       | 0.949 | +               | 0.974 | −1.145        |
| S25   | −0.456                                  | 0.350 | 0.167              | 1.469 | 90.811                          | 1.200        | −8.7                         | −9.4   | −8.5   | −8.8 | +++                       | 0.955 | +               | 0.974 | 0.083         |
| S26   | −0.450                                  | 0.355 | −0.025             | 0.944 | 91.166                          | 1.177        | −8.7                         | −9.4   | −8.3   | −9.1 | +++                       | 0.971 | +               | 0.975 | −0.012        |

| Comp. | Volume Distribution (V <sub>dss</sub> ) |       |                    |       | PPB (Plasma Protein Binding), % |              | AutoDock Vina, ΔG (kcal/mol) |        |        |       | BBB (Blood–Brain Barrier) |       |                 |       |               |
|-------|-----------------------------------------|-------|--------------------|-------|---------------------------------|--------------|------------------------------|--------|--------|-------|---------------------------|-------|-----------------|-------|---------------|
|       | ADMETLab                                |       | pkCSM              |       | ADMETLab                        | admetSAR 2.0 | HAS *                        |        | AGP ** |       | ADMETLab                  |       | admetSAR2.0 *** |       | pkCSM, Log BB |
|       | Log V <sub>d</sub>                      | L/kg  | Log V <sub>d</sub> | L/kg  |                                 |              | Site 1                       | Site 2 | A      | F1*S  | result                    | prob. | result          | prob. |               |
|       |                                         |       |                    |       |                                 |              |                              |        |        |       |                           |       |                 |       |               |
| S27   | −0.436                                  | 0.366 | −0.059             | 0.873 | 91.215                          | 1.164        | −8.4                         | −9.3   | −8.3   | −9.0  | +++                       | 0.976 | +               | 0.975 | 0.014         |
| S28   | −0.467                                  | 0.341 | 0.101              | 1.262 | 91.009                          | 1.119        | −8.4                         | −9.2   | −9.1   | −8.8  | +++                       | 0.972 | +               | 0.975 | 0.040         |
| S29   | −0.610                                  | 0.245 | −0.019             | 0.957 | 90.462                          | 1.120        | −9.0                         | −9.6   | −8.4   | −9.1  | +++                       | 0.946 | +               | 0.974 | −0.039        |
| S30   | −0.681                                  | 0.208 | −0.007             | 0.984 | 90.511                          | 1.118        | −8.8                         | −9.5   | −9.0   | −9.3  | +++                       | 0.946 | +               | 0.974 | −0.021        |
| S31   | −0.841                                  | 0.144 | −0.084             | 0.824 | 90.414                          | 1.128        | −9.2                         | −9.8   | −9.0   | −9.7  | +++                       | 0.946 | +               | 0.974 | −0.029        |
| S32   | −0.728                                  | 0.187 | −0.223             | 0.598 | 88.448                          | 1.087        | −8.7                         | −9.6   | −8.5   | −8.8  | +++                       | 0.985 | +               | 0.976 | −1.269        |
| S33   | −0.499                                  | 0.317 | −0.064             | 0.863 | 92.921                          | 1.088        | −9.7                         | −10.6  | −9.5   | −9.3  | ++                        | 0.893 | +               | 0.975 | −1.243        |
| S34   | −1.044                                  | 0.090 | −0.493             | 0.321 | 87.658                          | 1.219        | −8.7                         | −9.4   | −8.6   | −8.8  | +++                       | 0.901 | +               | 0.969 | −1.471        |
| S35   | −0.514                                  | 0.306 | −0.077             | 0.838 | 90.790                          | 1.019        | −8.4                         | −9.0   | −8.7   | −8.9  | +++                       | 0.950 | +               | 0.974 | −0.105        |
| S36   | −0.646                                  | 0.226 | −0.204             | 0.625 | 90.554                          | 1.140        | −8.7                         | −9.5   | −8.4   | −8.8  | ++                        | 0.884 | +               | 0.974 | −0.263        |
| S37   | −0.859                                  | 0.138 | −0.186             | 0.652 | 82.880                          | 1.267        | −8.7                         | −9.3   | −8.3   | −8.8  | ++                        | 0.774 | +               | 0.974 | −1.234        |
| S38   | −0.148                                  | 0.711 | 0.399              | 2.506 | 91.422                          | 1.066        | −8.2                         | −9.0   | −8.8   | −8.8  | +++                       | 0.975 | +               | 0.980 | 0.107         |
| S39   | −0.264                                  | 0.545 | 0.122              | 1.324 | 83.181                          | 1.128        | −8.2                         | −8.5   | −8.4   | −8.3  | +++                       | 0.969 | +               | 0.978 | −0.142        |
| S40   | −0.073                                  | 0.845 | 0.497              | 3.141 | 81.589                          | 1.036        | −8.4                         | −8.9   | −8.2   | −8.6  | +++                       | 0.944 | +               | 0.981 | −0.025        |
| S41   | −0.448                                  | 0.356 | −0.254             | 0.557 | 87.140                          | 1.073        | −8.1                         | −8.6   | −9.0   | −8.4  | ++                        | 0.884 | +               | 0.973 | −0.106        |
| S42   | −0.420                                  | 0.380 | −0.147             | 0.713 | 89.128                          | 1.126        | −8.0                         | −8.6   | −9.2   | −8.4  | ++                        | 0.868 | +               | 0.974 | −0.109        |
| S43   | −0.368                                  | 0.429 | −0.063             | 0.865 | 89.494                          | 1.073        | −8.2                         | −8.4   | −9.6   | −8.4  | +++                       | 0.909 | +               | 0.975 | −0.119        |
| S44   | −0.303                                  | 0.498 | −0.140             | 0.724 | 89.041                          | 1.223        | −7.9                         | −8.7   | −9.5   | −8.7  | ++                        | 0.826 | +               | 0.974 | −0.064        |
| S45   | −0.270                                  | 0.537 | 0.190              | 1.549 | 93.744                          | 1.141        | −9.5                         | −9.5   | −9.9   | −9.5  | ++                        | 0.795 | +               | 0.975 | −0.027        |
| S46   | −0.247                                  | 0.566 | 0.128              | 1.343 | 93.806                          | 1.124        | −8.7                         | −9.0   | −10.2  | −9.1  | ++                        | 0.879 | +               | 0.972 | −0.003        |
| S47   | −0.308                                  | 0.492 | −0.096             | 0.802 | 93.723                          | 1.031        | −9.1                         | −9.1   | −10.6  | −9.5  | ++                        | 0.816 | +               | 0.973 | 0.070         |
| S48   | −0.303                                  | 0.498 | −0.079             | 0.834 | 93.685                          | 1.083        | −9.1                         | −9.4   | −10.8  | −9.6  | +                         | 0.692 | +               | 0.973 | 0.067         |
| S49   | −0.305                                  | 0.495 | −0.091             | 0.811 | 93.657                          | 1.098        | −8.9                         | −9.0   | −10.6  | −9.9  | ++                        | 0.760 | +               | 0.973 | 0.070         |
| S50   | −0.407                                  | 0.392 | 0.191              | 1.552 | 93.873                          | 1.144        | −8.9                         | −9.9   | −9.6   | −9.3  | ++                        | 0.821 | +               | 0.973 | −0.035        |
| S51   | −0.586                                  | 0.259 | −0.171             | 0.675 | 94.508                          | 1.072        | −8.6                         | −9.4   | −10.2  | −9.6  | ++                        | 0.719 | +               | 0.975 | −1.427        |
| S52   | −0.316                                  | 0.483 | 0.102              | 1.265 | 96.183                          | 1.110        | −10.0                        | −10.7  | −10.0  | −10.3 | ++                        | 0.837 | +               | 0.972 | 0.045         |
| S53   | −0.571                                  | 0.269 | 0.106              | 1.276 | 91.192                          | 0.995        | −8.6                         | −9.1   | −10.1  | −8.6  | +++                       | 0.918 | +               | 0.973 | −1.395        |
| S54   | −0.470                                  | 0.339 | 0.048              | 1.117 | 94.315                          | 1.118        | −8.9                         | −9.2   | −9.8   | −9.0  | ++                        | 0.860 | +               | 0.970 | −0.082        |

| Comp. | Volume Distribution (V <sub>dss</sub> ) |       |                    |       | PPB (Plasma Protein Binding), % |              | AutoDock Vina, ΔG (kcal/mol) |        |        |      | BBB (Blood–Brain Barrier) |       |                 |       |               |
|-------|-----------------------------------------|-------|--------------------|-------|---------------------------------|--------------|------------------------------|--------|--------|------|---------------------------|-------|-----------------|-------|---------------|
|       | ADMETLab                                |       | pkCSM              |       | ADMETLab                        | admetSAR 2.0 | HAS *                        |        | AGP ** |      | ADMETLab                  |       | admetSAR2.0 *** |       | pkCSM, Log BB |
|       | Log V <sub>d</sub>                      | L/kg  | Log V <sub>d</sub> | L/kg  |                                 |              | Site 1                       | Site 2 | A      | F1*S | result                    | prob. | result          | prob. |               |
|       |                                         |       |                    |       |                                 |              |                              |        |        |      |                           |       |                 |       |               |
| S55   | −0.471                                  | 0.338 | 0.048              | 1.117 | 94.298                          | 1.089        | −8.9                         | −9.4   | −9.9   | −8.6 | ++                        | 0.756 | +               | 0.970 | −0.082        |

\* Molecular docking results with the first (site 1) and second (site 2) active site of human serum albumin (HSA); \*\* Molecular docking results with the AGP A variant and F1\*S variant; \*\*\* The obtained values of the probability for the unification of the results were rounded to thousandths.

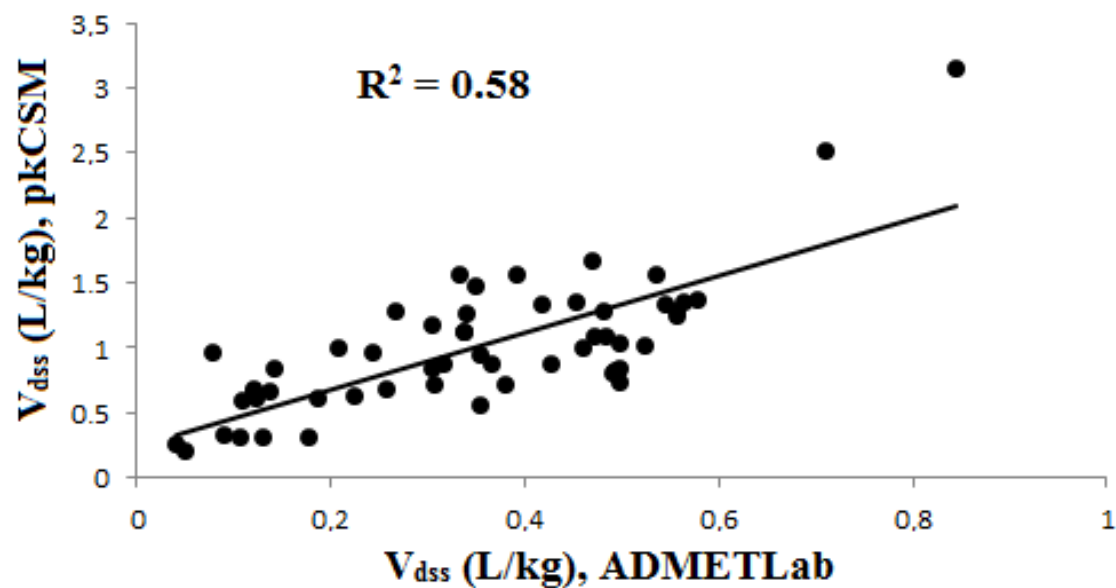

**Figure S4.** Correlation of the  $V_{dss}$  values for Salubrinol and its analogues calculated using online servers pkCSM and ADMETLab.

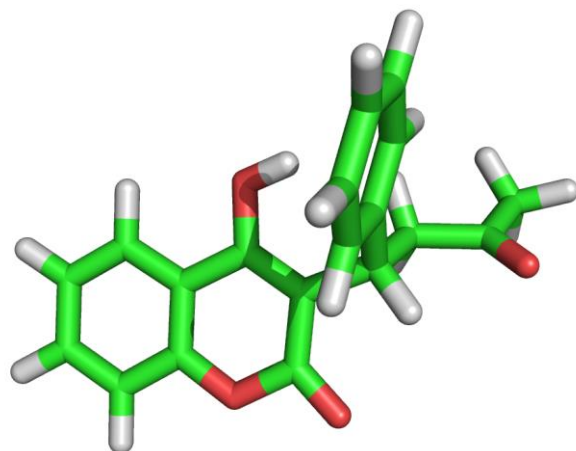

**Figure S5.** Warfarin structure optimized using the semi-empirical PM3 method in the ArgusLab 4.0.1 software package.

**Table S9.** Prediction results of the inhibitory and substrate activity of Salubrinal and its analogues concerning the metabolic enzyme CYP1A2.

| Comp. | Inhibitory activity |       |                |       |       |           |                  |       |        |       |               |                       | Substrate activity |       |
|-------|---------------------|-------|----------------|-------|-------|-----------|------------------|-------|--------|-------|---------------|-----------------------|--------------------|-------|
|       | ADMETLab            |       | admetSAR 2.0 * |       | pkCSM | SwissADME | SuperCYPsPred ** |       |        |       | AutoDock Vina |                       | ADMETLab           |       |
|       |                     |       |                |       |       |           | MACCS            |       | Morgan |       |               |                       |                    |       |
|       | result              | prob. | result         | prob. |       |           | result           | prob. | result | prob. | ΔG, kcal/mol  | pAC <sub>50</sub> *** | result             | prob. |
| S1    | ++                  | 0.879 | +              | 0.887 | +     | –         | –                | 0.636 | –      | 0.623 | –5.9          | 3.0                   | +                  | 0.524 |
| S2    | ++                  | 0.839 | +              | 0.911 | +     | –         | –                | 0.632 | –      | 0.604 | –6.7          | 3.5                   | +                  | 0.524 |
| S3    | +++                 | 0.928 | +              | 0.929 | +     | +         | –                | 0.571 | –      | 0.572 | –6.5          | 3.4                   | –                  | 0.465 |
| S4    | +++                 | 0.924 | +              | 0.929 | +     | +         | –                | 0.571 | –      | 0.617 | –7.1          | 3.7                   | –                  | 0.488 |
| S5    | +                   | 0.656 | –              | 0.542 | –     | –         | –                | 0.868 | –      | 0.720 | –8.4          | 4.5                   | –                  | 0.326 |
| S6    | ++                  | 0.835 | +              | 0.548 | –     | –         | –                | 0.838 | –      | 0.567 | –8.3          | 4.4                   | –                  | 0.419 |
| S7    | +                   | 0.636 | +              | 0.537 | –     | –         | –                | 0.910 | –      | 0.778 | –4.5          | 2.2                   | –                  | 0.386 |
| S8    | +++                 | 0.962 | +              | 0.912 | +     | +         | –                | 0.593 | +      | 0.554 | –8.5          | 4.5                   | +                  | 0.506 |
| S9    | ++                  | 0.809 | +              | 0.901 | +     | +         | –                | 0.586 | –      | 0.570 | –8.1          | 4.3                   | +                  | 0.606 |
| S10   | +++                 | 0.967 | +              | 0.924 | –     | +         | –                | 0.585 | +      | 0.621 | –8.5          | 4.5                   | +                  | 0.556 |
| S11   | +++                 | 0.912 | +              | 0.905 | –     | +         | –                | 0.585 | –      | 0.630 | –8.0          | 4.2                   | +                  | 0.572 |
| S12   | ++                  | 0.826 | +              | 0.895 | –     | +         | –                | 0.607 | –      | 0.595 | –7.3          | 3.8                   | +                  | 0.584 |
| S13   | ++                  | 0.753 | +              | 0.895 | –     | +         | –                | 0.607 | +      | 0.534 | –6.3          | 3.3                   | +                  | 0.562 |
| S14   | ++                  | 0.848 | +              | 0.895 | –     | +         | –                | 0.607 | +      | 0.539 | –8.0          | 4.2                   | +                  | 0.588 |

| Comp. | Inhibitory activity |       |                |       |       |           |                  |       |        |       |               |                       | Substrate activity |       |
|-------|---------------------|-------|----------------|-------|-------|-----------|------------------|-------|--------|-------|---------------|-----------------------|--------------------|-------|
|       | ADMETLab            |       | admetSAR 2.0 * |       | pkCSM | SwissADME | SuperCYPsPred ** |       |        |       | AutoDock Vina |                       | ADMETLab           |       |
|       |                     |       |                |       |       |           | MACCS            |       | Morgan |       |               |                       |                    |       |
|       | result              | prob. | result         | prob. |       |           | result           | prob. | result | prob. | ΔG, kcal/mol  | pAC <sub>50</sub> *** | result             | prob. |
| S15   | +++                 | 0.902 | +              | 0.604 | +     | –         | +                | 0.615 | –      | 0.553 | –7.2          | 3.8                   | –                  | 0.458 |
| S16   | +++                 | 0.906 | –              | 0.500 | +     | –         | –                | 0.578 | +      | 0.526 | –8.5          | 4.5                   | –                  | 0.486 |
| S17   | ++                  | 0.838 | +              | 0.774 | +     | +         | –                | 0.650 | –      | 0.509 | –7.3          | 3.8                   | +                  | 0.520 |
| S18   | +++                 | 0.904 | +              | 0.730 | –     | +         | –                | 0.578 | –      | 0.517 | –7.6          | 4.0                   | +                  | 0.616 |
| S19   | +++                 | 0.925 | +              | 0.646 | –     | +         | –                | 0.564 | –      | 0.562 | –7.8          | 4.1                   | +                  | 0.646 |
| S20   | +                   | 0.524 | –              | 0.612 | –     | –         | –                | 0.699 | –      | 0.563 | –8.0          | 4.2                   | +                  | 0.522 |
| S21   | +                   | 0.690 | –              | 0.554 | –     | –         | –                | 0.719 | –      | 0.620 | –7.4          | 3.9                   | –                  | 0.472 |
| S22   | ++                  | 0.810 | +              | 0.608 | –     | –         | –                | 0.683 | +      | 0.595 | –6.7          | 3.5                   | +                  | 0.604 |
| S23   | ++                  | 0.863 | +              | 0.682 | +     | –         | –                | 0.645 | +      | 0.608 | –6.9          | 3.6                   | –                  | 0.450 |
| S24   | +                   | 0.661 | +              | 0.682 | +     | –         | –                | 0.645 | –      | 0.526 | –7.5          | 3.9                   | –                  | 0.480 |
| S25   | +++                 | 0.917 | +              | 0.877 | +     | +         | –                | 0.584 | –      | 0.522 | –8.9          | 4.2                   | +                  | 0.558 |
| S26   | +++                 | 0.978 | +              | 0.911 | –     | +         | –                | 0.589 | +      | 0.589 | –9.2          | 4.5                   | +                  | 0.546 |
| S27   | +++                 | 0.968 | +              | 0.911 | –     | +         | –                | 0.589 | –      | 0.537 | –9.8          | 5.2                   | +                  | 0.546 |
| S28   | +++                 | 0.914 | +              | 0.908 | +     | +         | –                | 0.586 | –      | 0.530 | –9.2          | 3.9                   | +                  | 0.500 |
| S29   | +++                 | 0.916 | +              | 0.877 | –     | +         | –                | 0.584 | +      | 0.528 | –6.3          | 3.3                   | +                  | 0.562 |
| S30   | +++                 | 0.932 | +              | 0.877 | –     | +         | –                | 0.584 | +      | 0.554 | –7.8          | 4.1                   | +                  | 0.558 |
| S31   | ++                  | 0.881 | +              | 0.873 | –     | +         | –                | 0.572 | +      | 0.615 | –6.8          | 3.5                   | +                  | 0.586 |
| S32   | ++                  | 0.726 | +              | 0.782 | –     | –         | –                | 0.665 | –      | 0.556 | –5.7          | 2.9                   | +                  | 0.612 |
| S33   | ++                  | 0.772 | +              | 0.840 | –     | –         | –                | 0.598 | –      | 0.576 | –4.5          | 2.2                   | –                  | 0.488 |
| S34   | +                   | 0.596 | –              | 0.792 | –     | –         | –                | 0.938 | –      | 0.832 | –4.5          | 2.2                   | –                  | 0.446 |
| S35   | ++                  | 0.825 | +              | 0.891 | –     | –         | –                | 0.712 | –      | 0.795 | –8.2          | 4.3                   | +                  | 0.510 |
| S36   | ++                  | 0.842 | +              | 0.905 | –     | –         | –                | 0.713 | –      | 0.549 | –5.9          | 3.0                   | –                  | 0.480 |
| S37   | –                   | 0.316 | –              | 0.723 | –     | +         | –                | 0.889 | –      | 0.803 | –7.5          | 3.9                   | –                  | 0.442 |
| S38   | +                   | 0.669 | –              | 0.711 | –     | –         | –                | 0.902 | –      | 0.823 | –7.6          | 4.0                   | –                  | 0.496 |
| S39   | ---                 | 0.282 | –              | 0.850 | –     | +         | –                | 0.906 | –      | 0.819 | –7.4          | 3.9                   | –                  | 0.430 |
| S40   | ---                 | 0.291 | –              | 0.815 | –     | +         | –                | 0.902 | –      | 0.818 | –6.1          | 3.1                   | +                  | 0.596 |
| S41   | ++                  | 0.842 | +              | 0.915 | +     | +         | –                | 0.613 | –      | 0.577 | –8.9          | 4.7                   | +                  | 0.622 |
| S42   | ++                  | 0.852 | +              | 0.869 | +     | +         | –                | 0.631 | –      | 0.613 | –9.6          | 4.8                   | +                  | 0.680 |
| S43   | ++                  | 0.791 | +              | 0.771 | –     | +         | –                | 0.736 | –      | 0.641 | –9.8          | 5.2                   | +                  | 0.656 |



| Comp. | Inhibitory activity |       |                |       |       |           |                  |       |        |       |               |                       | Substrate activity |       |
|-------|---------------------|-------|----------------|-------|-------|-----------|------------------|-------|--------|-------|---------------|-----------------------|--------------------|-------|
|       | ADMETLab            |       | admetSAR 2.0 * |       | pkCSM | SwissADME | SuperCYPsPred ** |       |        |       | AutoDock Vina |                       | ADMETLab           |       |
|       |                     |       |                |       |       |           | MACCS            |       | Morgan |       |               |                       |                    |       |
|       | result              | prob. | result         | prob. |       |           | result           | prob. | result | prob. | ΔG, kcal/mol  | pAC <sub>50</sub> *** | result             | prob. |
| S44   | ++                  | 0.895 | +              | 0.808 | –     | +         | –                | 0.724 | –      | 0.671 | –7.8          | 4.1                   | +                  | 0.560 |
| S45   | ++                  | 0.848 | +              | 0.817 | +     | +         | –                | 0.735 | –      | 0.678 | –8.9          | 4.7                   | –                  | 0.462 |
| S46   | ++                  | 0.839 | +              | 0.899 | +     | +         | –                | 0.623 | –      | 0.648 | –8.6          | 4.6                   | +                  | 0.503 |
| S47   | ++                  | 0.818 | +              | 0.897 | +     | +         | –                | 0.640 | –      | 0.594 | –5.4          | 2.7                   | +                  | 0.689 |
| S48   | ++                  | 0.779 | +              | 0.915 | +     | +         | –                | 0.613 | –      | 0.524 | –9.6          | 4.8                   | +                  | 0.619 |
| S49   | ++                  | 0.798 | +              | 0.915 | +     | +         | –                | 0.613 | –      | 0.656 | –5.9          | 3.0                   | +                  | 0.619 |
| S50   | ++                  | 0.841 | +              | 0.915 | +     | +         | –                | 0.629 | –      | 0.613 | –7.3          | 3.8                   | +                  | 0.553 |
| S51   | ++                  | 0.833 | +              | 0.718 | +     | +         | –                | 0.582 | –      | 0.616 | –7.3          | 3.8                   | +                  | 0.690 |
| S52   | +++                 | 0.902 | +              | 0.899 | +     | –         | –                | 0.623 | –      | 0.542 | –5.4          | 2.7                   | +                  | 0.573 |
| S53   | ++                  | 0.860 | +              | 0.852 | +     | +         | –                | 0.581 | –      | 0.605 | –8.6          | 4.6                   | +                  | 0.563 |
| S54   | ++                  | 0.800 | +              | 0.824 | +     | +         | –                | 0.615 | –      | 0.619 | –6.2          | 3.2                   | +                  | 0.635 |
| S55   | ++                  | 0.739 | +              | 0.824 | +     | +         | –                | 0.615 | –      | 0.584 | –5.4          | 2.7                   | +                  | 0.534 |

\* The obtained values of the probability for the unification of the results were rounded to thousandths; \*\* When forecasting online, the SuperCYPsPred server allows you to select the fingerprints, MACCS, or Morgan, in the form of which the molecule will be presented. We used both fingerprints in our work; \*\*\* pAC<sub>50</sub> was determined by solving the equation  $y = -0.5687x - 0.329$ ; where y is pAC<sub>50</sub>; x –  $\Delta G$ .

**Table S10.** Prediction results of the inhibitory and substrate activity of Salubrinal and its analogues concerning the metabolic enzyme CYP2C9.

| Comp. | Inhibitory activity |       |                |       |       |           |                  |       |        |       |               |                       | Substrate activity |       |                |       |
|-------|---------------------|-------|----------------|-------|-------|-----------|------------------|-------|--------|-------|---------------|-----------------------|--------------------|-------|----------------|-------|
|       | ADMETLab            |       | admetSAR 2.0 * |       | pkCSM | SwissADME | SuperCYPsPred ** |       |        |       | AutoDock Vina |                       | ADMETLab           |       | admetSAR 2.0 * |       |
|       |                     |       |                |       |       |           | MACCS            |       | Morgan |       |               |                       |                    |       |                |       |
|       | result              | prob. | result         | prob. |       |           | result           | prob. | result | prob. | ΔG, kcal/mol  | pAC <sub>50</sub> *** | result             | prob. | result         | prob. |
| S1    | ++                  | 0.888 | +              | 0.893 | +     | +         | +                | 0.585 | –      | 0.686 | –10.1         | 6.5                   | +                  | 0.564 | –              | 0.791 |
| S2    | ++                  | 0.840 | +              | 0.901 | +     | +         | +                | 0.600 | –      | 0.685 | –10.0         | 6.5                   | –                  | 0.486 | –              | 0.595 |
| S3    | +++                 | 0.922 | +              | 0.880 | +     | +         | +                | 0.634 | –      | 0.689 | –10.6         | 6.8                   | +                  | 0.643 | –              | 0.786 |
| S4    | ++                  | 0.899 | +              | 0.880 | +     | +         | +                | 0.634 | –      | 0.556 | –10.3         | 6.6                   | +                  | 0.555 | –              | 0.786 |
| S5    | +                   | 0.551 | +              | 0.509 | –     | +         | –                | 0.756 | –      | 0.825 | –7.6          | 5.0                   | –                  | 0.349 | –              | 0.798 |
| S6    | +                   | 0.690 | +              | 0.537 | –     | +         | –                | 0.604 | –      | 0.610 | –7.3          | 4.8                   | +                  | 0.545 | –              | 0.602 |

| Comp. | Inhibitory activity |       |                |       |       |           |                  |       |        |       |               |                       | Substrate activity |       |                |       |
|-------|---------------------|-------|----------------|-------|-------|-----------|------------------|-------|--------|-------|---------------|-----------------------|--------------------|-------|----------------|-------|
|       | ADMETLab            |       | admetSAR 2.0 * |       | pkCSM | SwissADME | SuperCYPsPred ** |       |        |       | AutoDock Vina |                       | ADMETLab           |       | admetSAR 2.0 * |       |
|       |                     |       |                |       |       |           | MACCS            |       | Morgan |       |               |                       |                    |       |                |       |
|       | result              | prob. | result         | prob. |       |           | result           | prob. | result | prob. | ΔG, kcal/mol  | pAC <sub>50</sub> *** | result             | prob. | result         | prob. |
| S7    | +                   | 0.693 | +              | 0.539 | –     | +         | –                | 0.527 | –      | 0.745 | –7.9          | 5.2                   | –                  | 0.428 | –              | 0.809 |
| S8    | +++                 | 0.945 | +              | 0.921 | +     | +         | +                | 0.618 | –      | 0.625 | –8.1          | 5.3                   | –                  | 0.423 | –              | 0.602 |
| S9    | +++                 | 0.945 | +              | 0.924 | +     | +         | +                | 0.690 | –      | 0.610 | –9.0          | 5.8                   | –                  | 0.499 | –              | 0.606 |
| S10   | +++                 | 0.917 | +              | 0.928 | +     | +         | +                | 0.630 | –      | 0.672 | –8.3          | 5.4                   | –                  | 0.474 | –              | 0.606 |
| S11   | +++                 | 0.968 | +              | 0.928 | +     | +         | +                | 0.630 | –      | 0.643 | –9.3          | 6.0                   | +                  | 0.527 | –              | 0.606 |
| S12   | +++                 | 0.953 | +              | 0.889 | +     | +         | +                | 0.677 | –      | 0.574 | –8.7          | 5.7                   | +                  | 0.608 | –              | 0.606 |
| S13   | +++                 | 0.912 | +              | 0.889 | +     | +         | +                | 0.677 | –      | 0.631 | –8.5          | 5.5                   | +                  | 0.553 | –              | 0.606 |
| S14   | +++                 | 0.924 | +              | 0.889 | +     | +         | +                | 0.677 | –      | 0.707 | –8.9          | 5.8                   | +                  | 0.519 | –              | 0.606 |
| S15   | +++                 | 0.953 | +              | 0.744 | +     | +         | +                | 0.614 | –      | 0.632 | –8.8          | 5.7                   | –                  | 0.494 | –              | 0.602 |
| S16   | +++                 | 0.938 | +              | 0.797 | +     | +         | +                | 0.640 | –      | 0.634 | –8.9          | 5.8                   | –                  | 0.495 | –              | 0.602 |
| S17   | +++                 | 0.910 | +              | 0.877 | +     | +         | +                | 0.598 | –      | 0.615 | –8.1          | 5.3                   | +                  | 0.528 | –              | 0.602 |
| S18   | ++                  | 0.881 | +              | 0.870 | +     | +         | +                | 0.673 | –      | 0.603 | –8.7          | 5.7                   | +                  | 0.623 | –              | 0.598 |
| S19   | +++                 | 0.943 | +              | 0.888 | +     | +         | +                | 0.667 | –      | 0.681 | –8.1          | 5.3                   | +                  | 0.684 | –              | 0.598 |
| S20   | +++                 | 0.916 | +              | 0.788 | +     | +         | +                | 0.638 | –      | 0.594 | –8.4          | 5.5                   | +                  | 0.543 | –              | 0.598 |
| S21   | +++                 | 0.900 | +              | 0.779 | +     | +         | +                | 0.560 | –      | 0.726 | –8.7          | 5.7                   | –                  | 0.451 | –              | 0.798 |
| S22   | ++                  | 0.889 | +              | 0.901 | +     | +         | +                | 0.661 | –      | 0.556 | –8.5          | 5.5                   | +                  | 0.559 | –              | 0.805 |
| S23   | +++                 | 0.945 | +              | 0.751 | +     | +         | +                | 0.551 | –      | 0.571 | –8.4          | 5.5                   | –                  | 0.405 | –              | 1.000 |
| S24   | +++                 | 0.920 | +              | 0.751 | +     | +         | +                | 0.551 | –      | 0.605 | –8.4          | 5.5                   | –                  | 0.477 | –              | 1.000 |
| S25   | +++                 | 0.930 | +              | 0.907 | +     | +         | +                | 0.687 | –      | 0.611 | –8.4          | 5.5                   | +                  | 0.530 | –              | 0.803 |
| S26   | +++                 | 0.936 | +              | 0.905 | +     | +         | +                | 0.633 | –      | 0.629 | –8.7          | 5.7                   | –                  | 0.475 | –              | 0.803 |
| S27   | +++                 | 0.957 | +              | 0.905 | +     | +         | +                | 0.633 | –      | 0.678 | –9.8          | 6.3                   | +                  | 0.528 | –              | 0.803 |
| S28   | +++                 | 0.969 | +              | 0.878 | +     | +         | +                | 0.639 | –      | 0.670 | –8.3          | 5.4                   | –                  | 0.462 | –              | 0.602 |
| S29   | +++                 | 0.925 | +              | 0.907 | +     | +         | +                | 0.687 | –      | 0.607 | –8.6          | 5.6                   | +                  | 0.546 | –              | 0.803 |
| S30   | +++                 | 0.932 | +              | 0.907 | +     | +         | +                | 0.687 | –      | 0.618 | –8.8          | 5.7                   | +                  | 0.537 | –              | 0.803 |
| S31   | ++                  | 0.890 | +              | 0.883 | +     | +         | +                | 0.682 | –      | 0.669 | –8.9          | 5.8                   | +                  | 0.503 | –              | 0.807 |
| S32   | ++                  | 0.872 | +              | 0.933 | +     | +         | +                | 0.615 | –      | 0.755 | –9.0          | 5.8                   | –                  | 0.497 | –              | 0.606 |
| S33   | ++                  | 0.887 | +              | 0.849 | +     | +         | +                | 0.568 | –      | 0.782 | –9.2          | 6.0                   | –                  | 0.425 | –              | 0.602 |
| S34   | ++                  | 0.883 | –              | 0.714 | +     | +         | –                | 0.513 | –      | 0.783 | –8.9          | 5.8                   | –                  | 0.481 | –              | 0.798 |
| S35   | ++                  | 0.786 | +              | 0.925 | –     | +         | +                | 0.588 | –      | 0.695 | –8.4          | 5.5                   | +                  | 0.541 | +              | 0.596 |

| Comp. | Inhibitory activity |       |                |       |       |           |                  |       |        |       |               |                       | Substrate activity |       |                |       |
|-------|---------------------|-------|----------------|-------|-------|-----------|------------------|-------|--------|-------|---------------|-----------------------|--------------------|-------|----------------|-------|
|       | ADMETLab            |       | admetSAR 2.0 * |       | pkCSM | SwissADME | SuperCYPsPred ** |       |        |       | AutoDock Vina |                       | ADMETLab           |       | admetSAR 2.0 * |       |
|       |                     |       |                |       |       |           | MACCS            |       | Morgan |       |               |                       |                    |       |                |       |
|       | result              | prob. | result         | prob. |       |           | result           | prob. | result | prob. | ΔG, kcal/mol  | pAC <sub>50</sub> *** | result             | prob. | result         | prob. |
| S36   | ++                  | 0.885 | +              | 0.869 | –     | +         | +                | 0.632 | –      | 0.649 | –8.6          | 5.6                   | –                  | 0.412 | +              | 0.602 |
| S37   | –                   | 0.463 | –              | 0.649 | –     | +         | –                | 0.634 | –      | 0.790 | –8.4          | 5.5                   | –                  | 0.468 | –              | 0.611 |
| S38   | ++                  | 0.779 | –              | 0.555 | –     | +         | –                | 0.525 | –      | 0.699 | –8.2          | 5.4                   | +                  | 0.519 | –              | 0.604 |
| S39   | +                   | 0.670 | –              | 0.602 | –     | +         | –                | 0.588 | –      | 0.731 | –8.3          | 5.4                   | +                  | 0.553 | –              | 0.592 |
| S40   | +                   | 0.591 | –              | 0.617 | –     | +         | –                | 0.578 | –      | 0.784 | –8.4          | 5.5                   | +                  | 0.550 | +              | 0.600 |
| S41   | +                   | 0.582 | +              | 0.890 | –     | +         | +                | 0.545 | –      | 0.703 | –7.9          | 5.2                   | +                  | 0.613 | +              | 0.603 |
| S42   | +                   | 0.693 | +              | 0.848 | –     | +         | +                | 0.541 | –      | 0.651 | –8.3          | 5.4                   | +                  | 0.628 | +              | 0.605 |
| S43   | ++                  | 0.730 | +              | 0.755 | +     | +         | +                | 0.521 | –      | 0.681 | –8.1          | 5.3                   | +                  | 0.543 | +              | 0.809 |
| S44   | ++                  | 0.781 | +              | 0.899 | +     | +         | +                | 0.549 | –      | 0.647 | –8.4          | 5.5                   | +                  | 0.509 | –              | 0.600 |
| S45   | +++                 | 0.914 | +              | 0.813 | +     | +         | +                | 0.503 | –      | 0.646 | –9.0          | 5.8                   | +                  | 0.524 | –              | 0.584 |
| S46   | +++                 | 0.912 | +              | 0.888 | +     | +         | +                | 0.548 | –      | 0.659 | –9.5          | 6.2                   | +                  | 0.505 | –              | 0.806 |
| S47   | +++                 | 0.900 | +              | 0.869 | +     | +         | +                | 0.586 | –      | 0.662 | –9.2          | 6.0                   | +                  | 0.558 | –              | 0.800 |
| S48   | ++                  | 0.850 | +              | 0.890 | +     | +         | +                | 0.545 | –      | 0.691 | –9.2          | 6.0                   | +                  | 0.519 | –              | 0.588 |
| S49   | ++                  | 0.891 | +              | 0.890 | +     | +         | +                | 0.545 | –      | 0.662 | –9.5          | 6.2                   | +                  | 0.532 | –              | 0.588 |
| S50   | ++                  | 0.869 | +              | 0.866 | +     | +         | +                | 0.580 | –      | 0.656 | –9.3          | 6.0                   | –                  | 0.443 | –              | 1.000 |
| S51   | ++                  | 0.854 | +              | 0.836 | +     | +         | +                | 0.563 | –      | 0.656 | –9.0          | 5.8                   | +                  | 0.623 | –              | 1.000 |
| S52   | ++                  | 0.866 | +              | 0.888 | +     | +         | +                | 0.548 | –      | 0.611 | –9.4          | 6.1                   | –                  | 0.485 | –              | 0.806 |
| S53   | +++                 | 0.908 | +              | 0.833 | –     | +         | +                | 0.551 | –      | 0.607 | –8.6          | 5.6                   | +                  | 0.517 | –              | 0.805 |
| S54   | ++                  | 0.854 | +              | 0.873 | +     | +         | +                | 0.571 | –      | 0.645 | –9.2          | 6.0                   | +                  | 0.622 | –              | 0.590 |
| S55   | ++                  | 0.788 | +              | 0.873 | +     | +         | +                | 0.571 | –      | 0.708 | –9.3          | 6.0                   | +                  | 0.552 | –              | 0.590 |

\* The obtained values of the probability for the unification of the results were rounded to thousandths; \*\* When forecasting online, the SuperCYPsPred server allows you to select the fingerprints, MACCS, or Morgan, in the form of which the molecule will be presented. We used both fingerprints in our work; \*\*\* pAC<sub>50</sub> was determined by solving the equation  $y = -0.6155x + 0.305$ ; where y is pAC<sub>50</sub>; x –  $\Delta G$ .

**Table S11.** Prediction results of the inhibitory and substrate activity of Salubrinal and its analogues concerning the metabolic enzyme CYP2C19.

| Comp. | Inhibitory activity |       |                |       |       |           |                  |       |        |       |               |                       | Substrate activity |       |
|-------|---------------------|-------|----------------|-------|-------|-----------|------------------|-------|--------|-------|---------------|-----------------------|--------------------|-------|
|       | ADMETLab            |       | admetSAR 2.0 * |       | pkCSM | SwissADME | SuperCYPsPred ** |       |        |       | AutoDock Vina |                       | ADMETLab           |       |
|       |                     |       |                |       |       |           | MACCS            |       | Morgan |       |               |                       |                    |       |
|       | result              | prob. | result         | prob. |       |           | result           | prob. | result | prob. | ΔG, kcal/mol  | pAC <sub>50</sub> *** | result             | prob. |
| S1    | ++                  | 0.810 | +              | 0.840 | +     | +         | –                | 0.706 | –      | 0.663 | –10.0         | 6.7                   | –                  | 0.340 |
| S2    | ++                  | 0.740 | +              | 0.892 | +     | +         | –                | 0.702 | –      | 0.623 | –9.8          | 6.5                   | –                  | 0.322 |
| S3    | ++                  | 0.876 | +              | 0.872 | +     | +         | –                | 0.629 | –      | 0.680 | –10.1         | 6.7                   | –                  | 0.364 |
| S4    | ++                  | 0.817 | +              | 0.872 | +     | +         | –                | 0.629 | –      | 0.603 | –8.8          | 5.9                   | ---                | 0.250 |
| S5    | +                   | 0.556 | –              | 0.527 | –     | +         | –                | 0.861 | –      | 0.825 | –8.1          | 5.5                   | –                  | 0.304 |
| S6    | ++                  | 0.862 | +              | 0.621 | –     | +         | –                | 0.745 | –      | 0.784 | –8.1          | 5.5                   | –                  | 0.337 |
| S7    | ++                  | 0.757 | +              | 0.671 | –     | +         | –                | 0.672 | –      | 0.766 | –8.8          | 5.9                   | –                  | 0.304 |
| S8    | ++                  | 0.809 | +              | 0.886 | +     | +         | –                | 0.663 | –      | 0.755 | –9.2          | 6.2                   | –                  | 0.342 |
| S9    | ++                  | 0.823 | +              | 0.913 | +     | +         | –                | 0.647 | –      | 0.782 | –9.5          | 6.4                   | –                  | 0.459 |
| S10   | +++                 | 0.915 | +              | 0.905 | +     | +         | –                | 0.652 | –      | 0.707 | –9.7          | 6.5                   | –                  | 0.434 |
| S11   | +++                 | 0.921 | +              | 0.905 | +     | +         | –                | 0.652 | –      | 0.703 | –9.0          | 6.0                   | –                  | 0.473 |
| S12   | ++                  | 0.828 | +              | 0.898 | +     | +         | –                | 0.632 | –      | 0.765 | –9.8          | 6.5                   | –                  | 0.445 |
| S13   | ++                  | 0.872 | +              | 0.898 | +     | +         | –                | 0.632 | –      | 0.654 | –9.8          | 6.5                   | –                  | 0.477 |
| S14   | ++                  | 0.872 | +              | 0.898 | +     | +         | –                | 0.632 | –      | 0.716 | –9.7          | 6.5                   | –                  | 0.493 |
| S15   | ++                  | 0.742 | +              | 0.674 | +     | +         | –                | 0.729 | –      | 0.771 | –9.4          | 6.3                   | –                  | 0.354 |
| S16   | ++                  | 0.759 | +              | 0.679 | +     | +         | –                | 0.679 | –      | 0.763 | –9.1          | 6.1                   | –                  | 0.342 |
| S17   | ++                  | 0.787 | +              | 0.830 | +     | +         | –                | 0.681 | –      | 0.757 | –9.1          | 6.1                   | –                  | 0.338 |
| S18   | ++                  | 0.843 | +              | 0.878 | +     | +         | –                | 0.653 | –      | 0.719 | –9.1          | 6.1                   | –                  | 0.419 |
| S19   | +++                 | 0.905 | +              | 0.866 | +     | +         | –                | 0.580 | +      | 0.666 | –9.0          | 6.0                   | –                  | 0.563 |
| S20   | ---                 | 0.265 | –              | 0.573 | –     | +         | –                | 0.868 | –      | 0.783 | –9.5          | 6.4                   | –                  | 0.310 |
| S21   | –                   | 0.375 | –              | 0.538 | –     | +         | –                | 0.863 | –      | 0.748 | –9.1          | 6.1                   | –                  | 0.330 |
| S22   | ++                  | 0.853 | +              | 0.766 | +     | +         | –                | 0.713 | –      | 0.683 | –9.4          | 6.3                   | –                  | 0.377 |
| S23   | ++                  | 0.812 | +              | 0.682 | +     | +         | –                | 0.653 | –      | 0.648 | –9.3          | 6.2                   | –                  | 0.314 |
| S24   | ++                  | 0.791 | +              | 0.682 | +     | +         | –                | 0.653 | –      | 0.641 | –9.0          | 6.0                   | –                  | 0.366 |
| S25   | ++                  | 0.847 | +              | 0.905 | +     | +         | –                | 0.654 | –      | 0.709 | –9.4          | 6.3                   | –                  | 0.476 |
| S26   | ++                  | 0.882 | +              | 0.899 | +     | +         | –                | 0.664 | –      | 0.738 | –9.5          | 6.4                   | –                  | 0.384 |
| S27   | ++                  | 0.894 | +              | 0.899 | +     | +         | –                | 0.664 | –      | 0.706 | –8.2          | 5.6                   | –                  | 0.432 |
| S28   | +++                 | 0.925 | +              | 0.884 | +     | +         | –                | 0.664 | –      | 0.717 | –8.7          | 5.9                   | –                  | 0.372 |

| Comp. | Inhibitory activity |       |                |       |       |           |                  |       |        |       |               | Substrate activity    |          |       |
|-------|---------------------|-------|----------------|-------|-------|-----------|------------------|-------|--------|-------|---------------|-----------------------|----------|-------|
|       | ADMETLab            |       | admetSAR 2.0 * |       | pkCSM | SwissADME | SuperCYPsPred ** |       |        |       | AutoDock Vina |                       | ADMETLab |       |
|       |                     |       |                |       |       |           | MACCS            |       | Morgan |       |               |                       |          |       |
|       | result              | prob. | result         | prob. |       |           | result           | prob. | result | prob. | ΔG, kcal/mol  | pAC <sub>50</sub> *** | result   | prob. |
| S29   | ++                  | 0.870 | +              | 0.905 | +     | +         | –                | 0.654 | –      | 0.662 | –9.3          | 6.2                   | –        | 0.434 |
| S30   | ++                  | 0.870 | +              | 0.905 | +     | +         | –                | 0.654 | –      | 0.658 | –9.5          | 6.4                   | –        | 0.438 |
| S31   | ++                  | 0.826 | +              | 0.877 | +     | +         | –                | 0.659 | –      | 0.685 | –10.3         | 6.9                   | –        | 0.408 |
| S32   | +                   | 0.647 | +              | 0.862 | +     | +         | –                | 0.703 | –      | 0.762 | –9.2          | 6.2                   | –        | 0.449 |
| S33   | +                   | 0.691 | +              | 0.785 | +     | +         | –                | 0.682 | –      | 0.738 | –8.5          | 5.7                   | –        | 0.304 |
| S34   | +                   | 0.541 | –              | 0.827 | –     | –         | –                | 0.870 | –      | 0.786 | –9.3          | 6.2                   | –        | 0.338 |
| S35   | ++                  | 0.706 | +              | 0.903 | +     | +         | –                | 0.734 | –      | 0.791 | –8.8          | 5.9                   | –        | 0.381 |
| S36   | ++                  | 0.886 | +              | 0.899 | +     | +         | –                | 0.743 | –      | 0.686 | –9.6          | 6.4                   | –        | 0.457 |
| S37   | –                   | 0.428 | –              | 0.609 | –     | +         | –                | 0.799 | –      | 0.853 | –8.9          | 6.0                   | –        | 0.388 |
| S38   | ++                  | 0.850 | +              | 0.764 | +     | +         | –                | 0.754 | –      | 0.757 | –8.9          | 6.0                   | –        | 0.451 |
| S39   | ++                  | 0.806 | +              | 0.530 | –     | +         | –                | 0.813 | –      | 0.776 | –8.6          | 5.8                   | –        | 0.424 |
| S40   | ++                  | 0.704 | –              | 0.541 | +     | +         | –                | 0.763 | –      | 0.795 | –8.7          | 5.9                   | +        | 0.627 |
| S41   | ++                  | 0.726 | +              | 0.910 | +     | +         | –                | 0.729 | –      | 0.746 | –8.6          | 5.8                   | –        | 0.429 |
| S42   | +++                 | 0.921 | +              | 0.891 | +     | +         | –                | 0.717 | –      | 0.729 | –9.1          | 6.1                   | –        | 0.477 |
| S43   | +++                 | 0.911 | +              | 0.821 | +     | +         | –                | 0.740 | –      | 0.755 | –9.0          | 6.0                   | –        | 0.441 |
| S44   | +++                 | 0.904 | +              | 0.900 | +     | +         | –                | 0.690 | –      | 0.743 | –8.8          | 5.9                   | –        | 0.365 |
| S45   | +++                 | 0.928 | +              | 0.789 | +     | +         | –                | 0.740 | –      | 0.609 | –10.2         | 6.8                   | –        | 0.368 |
| S46   | +++                 | 0.912 | +              | 0.859 | +     | +         | –                | 0.730 | –      | 0.636 | –10.3         | 6.9                   | –        | 0.304 |
| S47   | +++                 | 0.925 | +              | 0.890 | +     | +         | –                | 0.750 | –      | 0.637 | –9.7          | 6.5                   | –        | 0.431 |
| S48   | +++                 | 0.951 | +              | 0.910 | +     | +         | –                | 0.729 | –      | 0.685 | –10.6         | 7.0                   | –        | 0.408 |
| S49   | +++                 | 0.954 | +              | 0.910 | +     | +         | –                | 0.729 | –      | 0.697 | –9.9          | 6.6                   | –        | 0.387 |
| S50   | +++                 | 0.961 | +              | 0.865 | +     | +         | –                | 0.733 | –      | 0.662 | –9.5          | 6.4                   | –        | 0.316 |
| S51   | +++                 | 0.952 | +              | 0.819 | +     | +         | –                | 0.709 | –      | 0.593 | –9.4          | 6.3                   | –        | 0.481 |
| S52   | +++                 | 0.903 | +              | 0.859 | +     | +         | –                | 0.730 | –      | 0.574 | –11.0         | 7.3                   | ---      | 0.282 |
| S53   | ++                  | 0.888 | +              | 0.851 | +     | +         | –                | 0.698 | –      | 0.631 | –9.4          | 6.3                   | –        | 0.370 |
| S54   | ++                  | 0.867 | +              | 0.843 | +     | +         | –                | 0.661 | –      | 0.726 | –9.1          | 6.1                   | –        | 0.440 |
| S55   | ++                  | 0.821 | +              | 0.843 | +     | +         | –                | 0.661 | –      | 0.695 | –8.9          | 6.0                   | –        | 0.422 |

\* The obtained values of the probability for the unification of the results were rounded to thousandths; \*\* When forecasting online, the SuperCYPsPred server allows you to select the fingerprints, MACCS, or Morgan, in the form of which the molecule will be presented. We used both fingerprints in our work; \*\*\* pAC<sub>50</sub> was determined by solving the equation  $y = -0.6192x + 0.4734$ ; where y is pAC<sub>50</sub>; x –  $\Delta G$ .

**Table S12.** Prediction results of the inhibitory and substrate activity of Salubrinal and its analogues concerning the metabolic enzyme CYP2D6.

| Comp. | Inhibitory activity |       |                   |       |       |                |                  |       |             |       |                 |                       | Substrate activity |       |                   |       |       |  |
|-------|---------------------|-------|-------------------|-------|-------|----------------|------------------|-------|-------------|-------|-----------------|-----------------------|--------------------|-------|-------------------|-------|-------|--|
|       | ADMETLab            |       | admetSAR 2.0<br>* |       | pkCSM | Swis-<br>sADME | SuperCYPsPred ** |       |             |       | AutoDock Vina   |                       | ADMETLab           |       | admetSAR 2.0<br>* |       | pkCSM |  |
|       |                     |       |                   |       |       |                | MACCS            |       | Morgan      |       |                 |                       |                    |       |                   |       |       |  |
|       | re-<br>sult         | prob. | result            | prob. |       |                | re-<br>sult      | prob. | re-<br>sult | prob. | ΔG,<br>kcal/mol | pAC <sub>50</sub> *** | re-<br>sult        | prob. | result            | prob. |       |  |
| S1    | –                   | 0.401 | –                 | 0.719 | –     | +              | –                | 0.590 | –           | 0.649 | –11.8           | 7.2                   | –                  | 0.394 | –                 | 0.858 | +     |  |
| S2    | –                   | 0.488 | –                 | 0.647 | –     | +              | –                | 0.587 | –           | 0.592 | –11.1           | 6.4                   | –                  | 0.391 | –                 | 0.874 | +     |  |
| S3    | –                   | 0.388 | +                 | 0.635 | –     | –              | –                | 0.583 | –           | 0.581 | –11.5           | 6.8                   | –                  | 0.401 | –                 | 0.840 | +     |  |
| S4    | +                   | 0.500 | +                 | 0.635 | –     | –              | –                | 0.583 | –           | 0.606 | –10.6           | 5.9                   | –                  | 0.374 | –                 | 0.840 | +     |  |
| S5    | –                   | 0.406 | –                 | 0.815 | –     | –              | –                | 0.638 | –           | 0.601 | –9.4            | 4.6                   | –                  | 0.307 | –                 | 0.849 | –     |  |
| S6    | –                   | 0.359 | –                 | 0.827 | –     | –              | –                | 0.602 | –           | 0.650 | –9.3            | 4.5                   | –                  | 0.340 | –                 | 0.855 | –     |  |
| S7    | +                   | 0.516 | –                 | 0.814 | –     | –              | –                | 0.551 | –           | 0.565 | –9.5            | 4.7                   | –                  | 0.372 | –                 | 0.852 | –     |  |
| S8    | +                   | 0.507 | +                 | 0.784 | –     | –              | –                | 0.623 | –           | 0.733 | –10.7           | 6.0                   | ---                | 0.290 | –                 | 0.847 | +     |  |
| S9    | –                   | 0.398 | +                 | 0.529 | –     | –              | –                | 0.585 | –           | 0.642 | –10.8           | 6.1                   | –                  | 0.339 | –                 | 0.862 | +     |  |
| S10   | +                   | 0.516 | +                 | 0.653 | +     | –              | –                | 0.606 | –           | 0.730 | –10.6           | 5.9                   | –                  | 0.330 | –                 | 0.862 | +     |  |
| S11   | –                   | 0.445 | +                 | 0.653 | +     | –              | –                | 0.606 | –           | 0.679 | –10.5           | 5.8                   | –                  | 0.378 | –                 | 0.862 | +     |  |
| S12   | –                   | 0.437 | –                 | 0.541 | –     | –              | –                | 0.575 | –           | 0.670 | –10.8           | 6.1                   | –                  | 0.307 | –                 | 0.862 | +     |  |
| S13   | –                   | 0.440 | –                 | 0.541 | +     | –              | –                | 0.575 | –           | 0.646 | –10.0           | 5.2                   | –                  | 0.386 | –                 | 0.862 | +     |  |
| S14   | +                   | 0.510 | –                 | 0.541 | +     | –              | –                | 0.575 | –           | 0.641 | –11.1           | 6.4                   | –                  | 0.406 | –                 | 0.862 | +     |  |
| S15   | –                   | 0.409 | –                 | 0.813 | –     | –              | –                | 0.731 | –           | 0.658 | –10.4           | 5.7                   | –                  | 0.338 | –                 | 0.842 | +     |  |
| S16   | +                   | 0.529 | –                 | 0.733 | +     | –              | –                | 0.723 | –           | 0.741 | –10.6           | 5.9                   | –                  | 0.332 | –                 | 0.842 | +     |  |
| S17   | –                   | 0.395 | +                 | 0.552 | –     | –              | –                | 0.610 | –           | 0.660 | –10.2           | 5.4                   | –                  | 0.335 | –                 | 0.848 | +     |  |
| S18   | –                   | 0.388 | –                 | 0.836 | –     | –              | –                | 0.682 | –           | 0.621 | –10.4           | 5.7                   | +                  | 0.507 | –                 | 0.833 | +     |  |
| S19   | –                   | 0.484 | –                 | 0.762 | –     | –              | –                | 0.674 | –           | 0.639 | –9.6            | 4.8                   | +                  | 0.568 | –                 | 0.833 | +     |  |
| S20   | –                   | 0.309 | –                 | 0.763 | –     | –              | –                | 0.794 | –           | 0.767 | –11.2           | 6.5                   | ---                | 0.257 | –                 | 0.878 | –     |  |
| S21   | –                   | 0.473 | –                 | 0.686 | –     | –              | –                | 0.806 | –           | 0.757 | –10.2           | 5.4                   | –                  | 0.339 | –                 | 0.862 | –     |  |
| S22   | –                   | 0.371 | –                 | 0.777 | –     | –              | –                | 0.711 | –           | 0.669 | –10.7           | 6.0                   | –                  | 0.333 | –                 | 0.872 | –     |  |
| S23   | +                   | 0.542 | –                 | 0.762 | –     | –              | –                | 0.721 | –           | 0.757 | –10.8           | 6.1                   | ---                | 0.287 | –                 | 0.865 | –     |  |
| S24   | –                   | 0.490 | –                 | 0.762 | –     | –              | –                | 0.721 | –           | 0.723 | –9.8            | 5.0                   | –                  | 0.310 | –                 | 0.865 | –     |  |
| S25   | –                   | 0.431 | +                 | 0.789 | –     | –              | –                | 0.577 | –           | 0.646 | –10.7           | 6.0                   | –                  | 0.309 | –                 | 0.854 | +     |  |
| S26   | +                   | 0.660 | +                 | 0.893 | +     | –              | –                | 0.594 | –           | 0.706 | –10.5           | 5.8                   | –                  | 0.304 | –                 | 0.854 | +     |  |

| Comp. | Inhibitory activity |       |                   |       |       |                |                  |       |             |       |                 |                       | Substrate activity |       |                   |       |       |
|-------|---------------------|-------|-------------------|-------|-------|----------------|------------------|-------|-------------|-------|-----------------|-----------------------|--------------------|-------|-------------------|-------|-------|
|       | ADMETLab            |       | admetSAR 2.0<br>* |       | pkCSM | Swis-<br>sADME | SuperCYPsPred ** |       |             |       | AutoDock Vina   |                       | ADMETLab           |       | admetSAR 2.0<br>* |       | pkCSM |
|       |                     |       |                   |       |       |                | MACCS            |       | Morgan      |       |                 |                       |                    |       |                   |       |       |
|       | re-<br>sult         | prob. | result            | prob. |       |                | re-<br>sult      | prob. | re-<br>sult | prob. | ΔG,<br>kcal/mol | pAC <sub>50</sub> *** | re-<br>sult        | prob. | result            | prob. |       |
| S27   | +                   | 0.559 | +                 | 0.893 | +     | –              | –                | 0.594 | –           | 0.648 | –10.0           | 5.2                   | –                  | 0.323 | –                 | 0.854 | +     |
| S28   | +                   | 0.510 | +                 | 0.875 | –     | –              | –                | 0.583 | –           | 0.674 | –9.5            | 4.7                   | –                  | 0.339 | –                 | 0.846 | +     |
| S29   | +                   | 0.567 | +                 | 0.789 | +     | –              | –                | 0.577 | –           | 0.623 | –9.8            | 5.0                   | –                  | 0.337 | –                 | 0.854 | +     |
| S30   | +                   | 0.623 | +                 | 0.789 | +     | –              | –                | 0.577 | –           | 0.617 | –10.9           | 6.2                   | –                  | 0.344 | –                 | 0.854 | +     |
| S31   | +                   | 0.614 | +                 | 0.624 | –     | –              | –                | 0.572 | –           | 0.607 | –11.1           | 6.4                   | –                  | 0.348 | –                 | 0.848 | +     |
| S32   | –                   | 0.468 | –                 | 0.589 | –     | –              | –                | 0.674 | –           | 0.654 | –9.6            | 4.8                   | –                  | 0.375 | –                 | 0.862 | +     |
| S33   | –                   | 0.457 | –                 | 0.530 | –     | –              | –                | 0.602 | –           | 0.653 | –9.7            | 4.9                   | –                  | 0.344 | –                 | 0.847 | +     |
| S34   | +                   | 0.533 | –                 | 0.823 | –     | +              | –                | 0.775 | –           | 0.720 | –9.0            | 4.1                   | –                  | 0.337 | –                 | 0.853 | –     |
| S35   | –                   | 0.402 | +                 | 0.519 | –     | –              | –                | 0.618 | –           | 0.666 | –10.1           | 5.3                   | –                  | 0.309 | –                 | 0.866 | –     |
| S36   | –                   | 0.450 | +                 | 0.510 | –     | –              | –                | 0.545 | –           | 0.646 | –10.3           | 5.5                   | –                  | 0.357 | –                 | 0.872 | +     |
| S37   | –                   | 0.461 | –                 | 0.864 | –     | –              | –                | 0.737 | –           | 0.655 | –10.2           | 5.4                   | –                  | 0.365 | –                 | 0.837 | –     |
| S38   | –                   | 0.415 | –                 | 0.813 | –     | –              | +                | 0.563 | +           | 0.535 | –10.6           | 5.9                   | –                  | 0.423 | –                 | 0.834 | –     |
| S39   | –                   | 0.350 | –                 | 0.910 | –     | –              | –                | 0.507 | –           | 0.548 | –10.3           | 5.5                   | –                  | 0.401 | –                 | 0.850 | –     |
| S40   | –                   | 0.451 | –                 | 0.834 | –     | –              | +                | 0.556 | +           | 0.552 | –10.6           | 5.9                   | –                  | 0.417 | –                 | 0.758 | +     |
| S41   | –                   | 0.372 | –                 | 0.835 | –     | –              | –                | 0.576 | –           | 0.711 | –9.5            | 4.7                   | –                  | 0.364 | –                 | 0.848 | –     |
| S42   | –                   | 0.449 | –                 | 0.867 | –     | –              | –                | 0.558 | –           | 0.647 | –9.8            | 5.0                   | –                  | 0.399 | –                 | 0.846 | –     |
| S43   | –                   | 0.415 | –                 | 0.810 | –     | –              | +                | 0.525 | –           | 0.693 | –9.8            | 5.0                   | –                  | 0.378 | –                 | 0.823 | –     |
| S44   | –                   | 0.389 | –                 | 0.883 | –     | –              | –                | 0.567 | –           | 0.732 | –9.7            | 4.9                   | –                  | 0.381 | –                 | 0.854 | –     |
| S45   | –                   | 0.493 | –                 | 0.698 | –     | +              | +                | 0.505 | –           | 0.604 | –11.0           | 6.3                   | –                  | 0.366 | –                 | 0.799 | +     |
| S46   | –                   | 0.443 | –                 | 0.784 | –     | +              | –                | 0.592 | –           | 0.708 | –11.1           | 6.4                   | –                  | 0.310 | –                 | 0.853 | +     |
| S47   | –                   | 0.372 | –                 | 0.814 | –     | +              | –                | 0.576 | –           | 0.681 | –11.0           | 6.3                   | –                  | 0.362 | –                 | 0.888 | +     |
| S48   | –                   | 0.443 | –                 | 0.835 | –     | +              | –                | 0.576 | –           | 0.695 | –11.5           | 6.8                   | –                  | 0.394 | –                 | 0.868 | +     |
| S49   | –                   | 0.423 | –                 | 0.835 | –     | +              | –                | 0.576 | –           | 0.733 | –10.5           | 5.8                   | –                  | 0.406 | –                 | 0.868 | +     |
| S50   | –                   | 0.479 | –                 | 0.663 | –     | +              | –                | 0.547 | –           | 0.696 | –10.7           | 6.0                   | –                  | 0.357 | –                 | 0.852 | +     |
| S51   | –                   | 0.449 | –                 | 0.890 | –     | +              | –                | 0.657 | –           | 0.706 | –10.3           | 5.5                   | +                  | 0.584 | –                 | 0.833 | –     |
| S52   | –                   | 0.465 | –                 | 0.784 | –     | +              | –                | 0.592 | –           | 0.618 | –11.8           | 7.2                   | –                  | 0.387 | –                 | 0.853 | +     |
| S53   | –                   | 0.487 | –                 | 0.781 | –     | +              | +                | 0.529 | –           | 0.642 | –10.3           | 5.5                   | –                  | 0.393 | –                 | 0.854 | –     |
| S54   | –                   | 0.477 | –                 | 0.832 | –     | –              | –                | 0.572 | –           | 0.623 | –10.9           | 6.2                   | –                  | 0.430 | –                 | 0.859 | +     |

| Comp. | Inhibitory activity |       |                |       |       |            |                  |       |        |       |               |                       | Substrate activity    |         |                |        |       |
|-------|---------------------|-------|----------------|-------|-------|------------|------------------|-------|--------|-------|---------------|-----------------------|-----------------------|---------|----------------|--------|-------|
|       | ADMETLab            |       | admetSAR 2.0 * |       | pkCSM | Swis-sADME | SuperCYPsPred ** |       |        |       | AutoDock Vina |                       | ADMETLab              |         | admetSAR 2.0 * |        | pkCSM |
|       | re-sult             | prob. | result         | prob. |       |            | MACCS            |       | Morgan |       |               | $\Delta G$ , kcal/mol | pAC <sub>50</sub> *** | re-sult | prob.          | result | prob. |
| S55   | –                   | 0.413 | –              | 0.832 | –     | –          | –                | 0.572 | –      | 0.683 | –10.7         | 6.0                   | –                     | 0.398   | –              | 0.859  | +     |

\* The obtained values of the probability for the unification of the results were rounded to thousandths; \*\* When forecasting online, the SuperCYPsPred server allows you to select the fingerprints, MACCS, or Morgan, in the form of which the molecule will be presented. We used both fingerprints in our work; \*\*\* pAC<sub>50</sub> was determined by solving the equation  $y = -1.0875x - 5.6588$ ; where y is pAC<sub>50</sub>; x –  $\Delta G$ .

**Table S13.** Prediction results of the inhibitory and substrate activity of Salubrinol and its analogues concerning the metabolic enzyme CYP3A4.

| Comp. | Inhibitory activity |       |                |       |       |            |                  |       |        |       |               |                       | Substrate activity    |         |                |         |       |
|-------|---------------------|-------|----------------|-------|-------|------------|------------------|-------|--------|-------|---------------|-----------------------|-----------------------|---------|----------------|---------|-------|
|       | ADMETLab            |       | admetSAR 2.0 * |       | pkCSM | Swis-sADME | SuperCYPsPred ** |       |        |       | AutoDock Vina |                       | ADMETLab              |         | admetSAR 2.0 * |         | pkCSM |
|       | re-sult             | prob. | re-sult        | prob. |       |            | MACCS            |       | Morgan |       |               | $\Delta G$ , kcal/mol | pAC <sub>50</sub> *** | re-sult | prob.          | re-sult | prob. |
| S1    | ++                  | 0.749 | +              | 0.836 | +     | +          | –                | 0.776 | –      | 0.571 | –10.4         | 5.5                   | –                     | 0.372   | +              | 0.551   | +     |
| S2    | ++                  | 0.852 | +              | 0.898 | +     | +          | –                | 0.776 | –      | 0.504 | –9.5          | 5.3                   | –                     | 0.380   | +              | 0.559   | +     |
| S3    | ++                  | 0.831 | +              | 0.896 | +     | +          | –                | 0.799 | –      | 0.531 | –10.8         | 5.6                   | –                     | 0.362   | +              | 0.554   | +     |
| S4    | ++                  | 0.877 | +              | 0.896 | +     | +          | –                | 0.799 | +      | 0.556 | –9.5          | 5.3                   | –                     | 0.346   | +              | 0.535   | +     |
| S5    | +                   | 0.500 | +              | 0.730 | –     | –          | –                | 0.855 | –      | 0.592 | –8.4          | 4.9                   | ---                   | 0.282   | –              | 0.535   | +     |
| S6    | –                   | 0.483 | +              | 0.559 | –     | –          | –                | 0.775 | –      | 0.523 | –7.7          | 4.7                   | –                     | 0.452   | +              | 0.520   | +     |
| S7    | +                   | 0.604 | +              | 0.750 | +     | +          | –                | 0.685 | +      | 0.527 | –8.7          | 5.0                   | +                     | 0.504   | +              | 0.603   | +     |
| S8    | ++                  | 0.837 | +              | 0.829 | +     | +          | –                | 0.821 | –      | 0.618 | –9.3          | 5.2                   | –                     | 0.344   | –              | 0.521   | +     |
| S9    | ++                  | 0.880 | +              | 0.821 | +     | +          | –                | 0.780 | –      | 0.612 | –9.8          | 5.3                   | +                     | 0.594   | +              | 0.527   | +     |
| S10   | +++                 | 0.947 | +              | 0.851 | +     | +          | –                | 0.817 | –      | 0.544 | –9.8          | 5.3                   | +                     | 0.535   | +              | 0.552   | +     |
| S11   | +++                 | 0.944 | +              | 0.851 | +     | +          | –                | 0.817 | –      | 0.551 | –9.8          | 5.3                   | +                     | 0.568   | +              | 0.547   | +     |
| S12   | ++                  | 0.896 | +              | 0.734 | +     | +          | –                | 0.768 | –      | 0.585 | –10.1         | 5.4                   | +                     | 0.564   | +              | 0.548   | +     |
| S13   | ++                  | 0.894 | +              | 0.734 | +     | +          | –                | 0.768 | –      | 0.534 | –10.1         | 5.4                   | +                     | 0.558   | +              | 0.547   | +     |
| S14   | ++                  | 0.832 | +              | 0.734 | +     | +          | –                | 0.768 | –      | 0.540 | –10.2         | 5.5                   | +                     | 0.598   | +              | 0.529   | +     |
| S15   | ++                  | 0.891 | +              | 0.632 | +     | +          | –                | 0.824 | –      | 0.580 | –9.4          | 5.2                   | –                     | 0.364   | +              | 0.512   | +     |
| S16   | +++                 | 0.955 | +              | 0.827 | +     | +          | –                | 0.799 | –      | 0.512 | –9.4          | 5.2                   | –                     | 0.360   | +              | 0.545   | +     |
| S17   | ++                  | 0.779 | +              | 0.870 | +     | +          | –                | 0.749 | –      | 0.593 | –9.4          | 5.2                   | –                     | 0.328   | +              | 0.510   | +     |



| Comp. | Inhibitory activity |       |                |       |       |                |                  |       |             |       |                 |                          | Substrate activity |       |                   |       |       |
|-------|---------------------|-------|----------------|-------|-------|----------------|------------------|-------|-------------|-------|-----------------|--------------------------|--------------------|-------|-------------------|-------|-------|
|       | ADMETLab            |       | admetSAR 2.0 * |       | pkCSM | Swis-<br>sADME | SuperCYPsPred ** |       |             |       | AutoDock Vina   |                          | ADMETLab           |       | admetSAR 2.0<br>* |       | pkCSM |
|       |                     |       |                |       |       |                | MACCS            |       | Morgan      |       |                 |                          |                    |       |                   |       |       |
|       | re-<br>sult         | prob. | re-<br>sult    | prob. |       |                | re-<br>sult      | prob. | re-<br>sult | prob. | ΔG,<br>kcal/mol | pAC <sub>50</sub><br>*** | re-<br>sult        | prob. | re-<br>sult       | prob. |       |
| S18   | +++                 | 0.923 | +              | 0.714 | +     | +              | –                | 0.786 | –           | 0.575 | –9.5            | 5.3                      | +                  | 0.576 | +                 | 0.573 | +     |
| S19   | +++                 | 0.945 | +              | 0.823 | +     | +              | –                | 0.824 | –           | 0.631 | –9.3            | 5.2                      | +                  | 0.574 | +                 | 0.601 | +     |
| S20   | +                   | 0.682 | +              | 0.665 | –     | –              | –                | 0.886 | –           | 0.659 | –8.8            | 5.0                      | –                  | 0.310 | –                 | 0.557 | +     |
| S21   | +                   | 0.671 | +              | 0.742 | –     | –              | –                | 0.902 | –           | 0.688 | –10.1           | 5.4                      | –                  | 0.354 | –                 | 0.500 | +     |
| S22   | ++                  | 0.854 | +              | 0.748 | +     | +              | –                | 0.784 | –           | 0.632 | –8.7            | 5.0                      | +                  | 0.562 | +                 | 0.568 | +     |
| S23   | ++                  | 0.894 | +              | 0.814 | +     | +              | –                | 0.689 | –           | 0.514 | –9.9            | 5.4                      | –                  | 0.430 | +                 | 0.612 | +     |
| S24   | ++                  | 0.848 | +              | 0.814 | +     | +              | –                | 0.689 | –           | 0.580 | –9.9            | 5.4                      | –                  | 0.414 | +                 | 0.611 | +     |
| S25   | ++                  | 0.865 | +              | 0.757 | +     | +              | –                | 0.777 | –           | 0.594 | –9.7            | 5.3                      | –                  | 0.454 | +                 | 0.521 | +     |
| S26   | +++                 | 0.909 | +              | 0.796 | +     | +              | –                | 0.818 | –           | 0.554 | –9.6            | 5.3                      | –                  | 0.438 | +                 | 0.578 | +     |
| S27   | +++                 | 0.931 | +              | 0.796 | +     | +              | –                | 0.818 | –           | 0.607 | –9.7            | 5.3                      | –                  | 0.444 | +                 | 0.570 | +     |
| S28   | ++                  | 0.871 | +              | 0.715 | +     | +              | –                | 0.816 | –           | 0.560 | –9.6            | 5.3                      | –                  | 0.386 | +                 | 0.535 | +     |
| S29   | +++                 | 0.910 | +              | 0.757 | +     | +              | –                | 0.777 | –           | 0.511 | –9.8            | 5.3                      | –                  | 0.448 | +                 | 0.577 | +     |
| S30   | +++                 | 0.923 | +              | 0.757 | +     | +              | –                | 0.777 | –           | 0.548 | –10.0           | 5.4                      | –                  | 0.458 | +                 | 0.592 | +     |
| S31   | ++                  | 0.797 | +              | 0.615 | +     | +              | –                | 0.769 | –           | 0.544 | –10.5           | 5.6                      | –                  | 0.438 | +                 | 0.582 | +     |
| S32   | ++                  | 0.794 | +              | 0.901 | +     | +              | –                | 0.827 | –           | 0.610 | –9.8            | 5.3                      | +                  | 0.588 | +                 | 0.559 | +     |
| S33   | ++                  | 0.720 | –              | 0.527 | +     | +              | –                | 0.793 | –           | 0.597 | –10.0           | 5.4                      | –                  | 0.390 | +                 | 0.533 | +     |
| S34   | ++                  | 0.820 | +              | 0.533 | –     | +              | –                | 0.931 | –           | 0.628 | –9.8            | 5.3                      | –                  | 0.420 | +                 | 0.516 | +     |
| S35   | +                   | 0.611 | +              | 0.853 | –     | +              | –                | 0.788 | –           | 0.625 | –9.1            | 5.1                      | –                  | 0.380 | +                 | 0.517 | +     |
| S36   | ++                  | 0.885 | +              | 0.738 | +     | +              | –                | 0.757 | +           | 0.531 | –9.6            | 5.3                      | +                  | 0.582 | +                 | 0.602 | +     |
| S37   | +                   | 0.544 | +              | 0.634 | –     | +              | –                | 0.848 | –           | 0.619 | –9.1            | 5.1                      | –                  | 0.460 | +                 | 0.570 | +     |
| S38   | ++                  | 0.819 | +              | 0.550 | –     | +              | –                | 0.757 | –           | 0.563 | –8.8            | 5.0                      | –                  | 0.424 | +                 | 0.500 | +     |
| S39   | +                   | 0.631 | –              | 0.760 | –     | +              | –                | 0.777 | –           | 0.552 | –8.6            | 5.0                      | –                  | 0.352 | +                 | 0.508 | +     |
| S40   | +                   | 0.589 | –              | 0.807 | –     | +              | –                | 0.789 | –           | 0.586 | –8.8            | 5.0                      | ++                 | 0.732 | +                 | 0.552 | +     |
| S41   | –                   | 0.462 | +              | 0.824 | –     | +              | –                | 0.794 | –           | 0.645 | –8.0            | 4.8                      | +                  | 0.522 | +                 | 0.544 | +     |
| S42   | +                   | 0.696 | +              | 0.668 | –     | +              | –                | 0.791 | –           | 0.623 | –8.4            | 4.9                      | +                  | 0.572 | +                 | 0.533 | +     |
| S43   | +                   | 0.710 | +              | 0.799 | +     | +              | –                | 0.725 | –           | 0.598 | –8.3            | 4.9                      | +                  | 0.570 | +                 | 0.562 | +     |
| S44   | ++                  | 0.769 | +              | 0.817 | –     | +              | –                | 0.744 | –           | 0.633 | –8.7            | 5.0                      | +                  | 0.578 | +                 | 0.555 | +     |
| S45   | ++                  | 0.867 | +              | 0.890 | +     | +              | –                | 0.748 | –           | 0.537 | –9.9            | 5.4                      | –                  | 0.354 | +                 | 0.564 | +     |

| Comp. | Inhibitory activity |       |                |       |       |                |                  |       |             |       |                 |                          | Substrate activity |       |                   |       |       |
|-------|---------------------|-------|----------------|-------|-------|----------------|------------------|-------|-------------|-------|-----------------|--------------------------|--------------------|-------|-------------------|-------|-------|
|       | ADMETLab            |       | admetSAR 2.0 * |       | pkCSM | Swis-<br>sADME | SuperCYPsPred ** |       |             |       | AutoDock Vina   |                          | ADMETLab           |       | admetSAR 2.0<br>* |       | pkCSM |
|       |                     |       |                |       |       |                | MACCS            |       | Morgan      |       |                 |                          |                    |       |                   |       |       |
|       | re-<br>sult         | prob. | re-<br>sult    | prob. |       |                | re-<br>sult      | prob. | re-<br>sult | prob. | ΔG,<br>kcal/mol | pAC <sub>50</sub><br>*** | re-<br>sult        | prob. | re-<br>sult       | prob. |       |
| S46   | ++                  | 0.797 | +              | 0.802 | +     | +              | –                | 0.791 | –           | 0.567 | –9.8            | 5.3                      | –                  | 0.328 | +                 | 0.530 | +     |
| S47   | ++                  | 0.857 | +              | 0.824 | +     | +              | –                | 0.765 | –           | 0.596 | –10.6           | 5.6                      | +                  | 0.610 | +                 | 0.584 | +     |
| S48   | ++                  | 0.856 | +              | 0.824 | +     | +              | –                | 0.794 | –           | 0.550 | –10.3           | 5.5                      | +                  | 0.570 | +                 | 0.583 | +     |
| S49   | ++                  | 0.878 | +              | 0.824 | +     | +              | –                | 0.794 | –           | 0.573 | –9.1            | 5.1                      | +                  | 0.534 | +                 | 0.582 | +     |
| S50   | ++                  | 0.804 | +              | 0.711 | +     | +              | –                | 0.794 | –           | 0.541 | –9.8            | 5.3                      | –                  | 0.346 | +                 | 0.578 | +     |
| S51   | +++                 | 0.935 | +              | 0.522 | +     | +              | –                | 0.835 | –           | 0.508 | –9.8            | 5.3                      | +                  | 0.560 | +                 | 0.623 | +     |
| S52   | ++                  | 0.826 | +              | 0.802 | +     | +              | –                | 0.791 | –           | 0.554 | –10.5           | 5.6                      | –                  | 0.368 | +                 | 0.570 | +     |
| S53   | ++                  | 0.785 | +              | 0.901 | –     | +              | –                | 0.745 | –           | 0.597 | –9.0            | 5.1                      | –                  | 0.340 | +                 | 0.586 | +     |
| S54   | ++                  | 0.895 | +              | 0.921 | +     | +              | –                | 0.693 | +           | 0.508 | –9.6            | 5.3                      | –                  | 0.436 | +                 | 0.592 | +     |
| S55   | ++                  | 0.825 | +              | 0.921 | +     | +              | –                | 0.693 | –           | 0.561 | –9.7            | 5.3                      | –                  | 0.436 | +                 | 0.605 | +     |

\* The obtained values of the probability for the unification of the results were rounded to thousandths; \*\* When forecasting online, the SuperCYPsPred server allows you to select the fingerprints, MACCS, or Morgan, in the form of which the molecule will be presented. We used both fingerprints in our work; \*\*\* pAC<sub>50</sub> was determined by solving the equation  $y = -0.2997x + 2.4041$ ; where y is pAC<sub>50</sub>; x –  $\Delta G$ .

**Table S14.** Molecular docking results for reference compounds E1–E13 with enzymes of the P450 family.

| Entry | Structure                                                                                            | CYP1A2            |                       | CYP2C9            |                       | CYP2C19           |                       | CYP2D6            |                       | CYP3A4            |                       |
|-------|------------------------------------------------------------------------------------------------------|-------------------|-----------------------|-------------------|-----------------------|-------------------|-----------------------|-------------------|-----------------------|-------------------|-----------------------|
|       |                                                                                                      | pAC <sub>50</sub> | $\Delta G$ , kcal/mol |
| E1    | 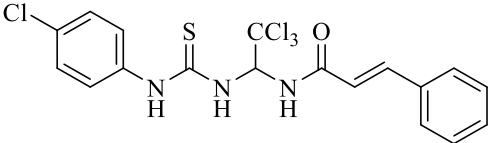<br>Sal 003 (S27) | 5.40              | –9.8                  | 6.25              | –9.8                  | 5.45              | –8.2                  | 5.10              | –10.0                 | 5.35              | –9.7                  |

| Entry | Structure                                                                           | CYP1A2            |                 | CYP2C9            |                 | CYP2C19           |                 | CYP2D6            |                 | CYP3A4            |                 |
|-------|-------------------------------------------------------------------------------------|-------------------|-----------------|-------------------|-----------------|-------------------|-----------------|-------------------|-----------------|-------------------|-----------------|
|       |                                                                                     | pAC <sub>50</sub> | ΔG,<br>kcal/mol |
| E2    | 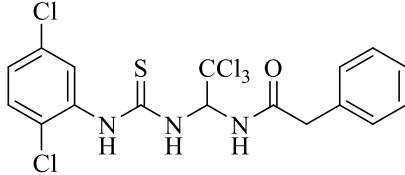   | *                 | –               | 6.25              | –9.8            | 6.95              | –10.4           | 5.50              | –10.1           | 5.35              | –9.6            |
| E3    |    | 4.90              | –9.2            | **                | –               | 5.80              | –8.3            | 4.95              | –9.9            | 5.20              | –9.4            |
| E4    |    | 4.80              | –9.2            | 5.90              | –9.0            | 5.90              | –8.9            | 4.85              | –9.7            | 5.30              | –9.5            |
| E5    |    | 5.15              | –9.6            | 5.15              | –8.6            | 6.15              | –9.2            | *                 | –               | 4.95              | –9.0            |
| E6    |   | 4.70              | –9.0            | 5.90              | –9.2            | 6.10              | –9.1            | 4.80              | –9.6            | 5.15              | –9.4            |
| E7    |  | 4.60              | –9.0            | 5.95              | –8.6            | 6.10              | –9.0            | 4.85              | –9.6            | 4.85              | –8.2            |
| E8    |  | 4.85              | –9.2            | 7.40              | –11.2           | 4.90              | –7.4            | *                 | –               | 4.60              | –7.8            |

| Entry | Structure                                                                          | CYP1A2            |                 | CYP2C9            |                 | CYP2C19           |                 | CYP2D6            |                 | CYP3A4            |                 |
|-------|------------------------------------------------------------------------------------|-------------------|-----------------|-------------------|-----------------|-------------------|-----------------|-------------------|-----------------|-------------------|-----------------|
|       |                                                                                    | pAC <sub>50</sub> | ΔG,<br>kcal/mol |
| E9    | 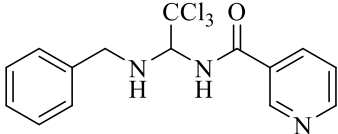  | *                 | –               | 4.85              | –8.4            | 5.35              | –8.2            | *                 | –               | 4.90              | –8.1            |
| E10   |   | 4.65              | –8.6            | 6.65              | –10.4           | 5.55              | –8.4            | *                 | –               | 5.00              | –8.6            |
| E11   |   | 4.70              | –8.9            | 5.85              | –8.4            | 6.15              | –9.1            | 5.05              | –9.8            | 4.80              | –7.8            |
| E12   |   | 4.65              | –8.5            | 5.05              | –7.3            | 5.55              | –7.8            | *                 | –               | 4.85              | –8.0            |
| E13   |  | 4.85              | –9.0            | 6.10              | –9.2            | 5.25              | –7.5            | *                 | –               | 4.85              | –8.0            |

\* Substance does not exhibit inhibitory activity or AC<sub>50</sub> > 10μ; \*\* No data on the inhibitory activity of this substance.

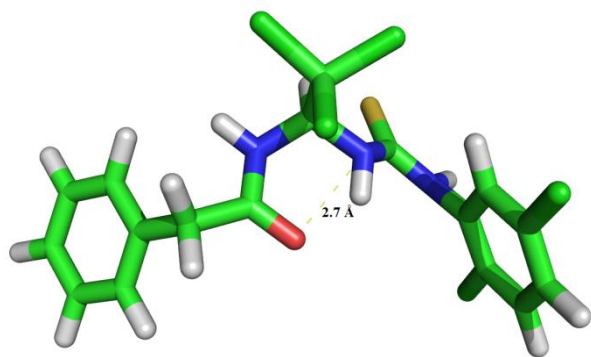

E2,  $\Delta G = -110176.6$  kcal/mol

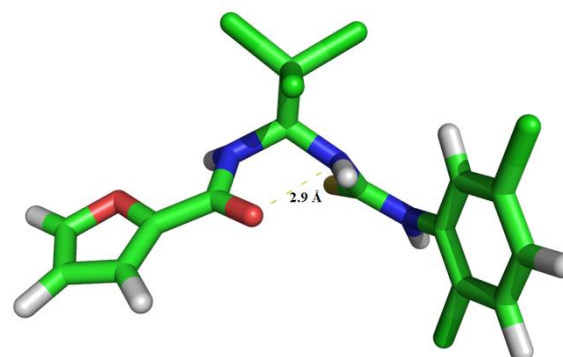

E3,  $\Delta G = -107309.9$  kcal/mol

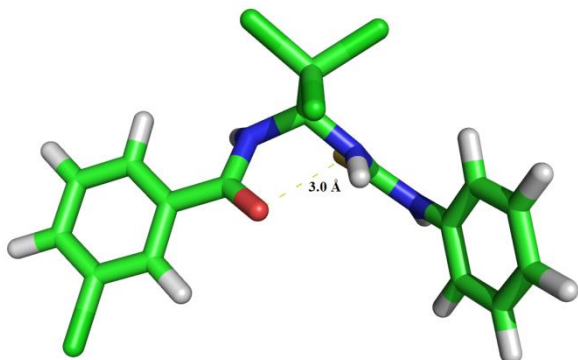

E4,  $\Delta G = -99785.6$  kcal/mol

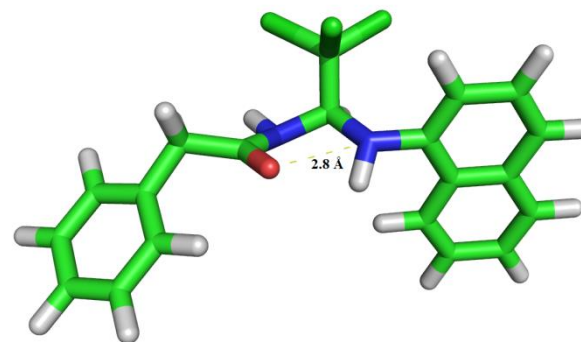

E5,  $\Delta G = -96809.0$  kcal/mol

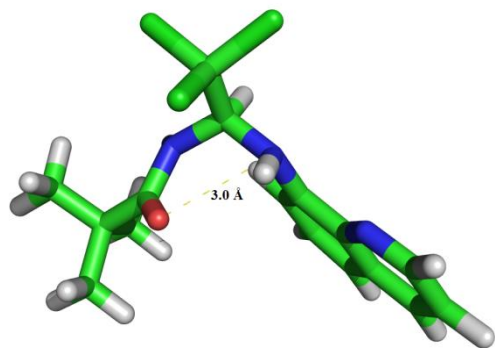

E6,  $\Delta G = -90013.1$  kcal/mol

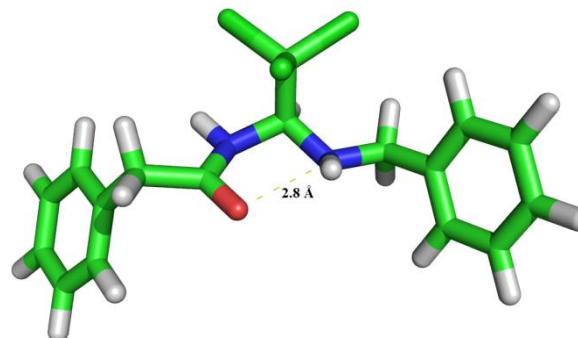

E7,  $\Delta G = -88627.7$  kcal/mol

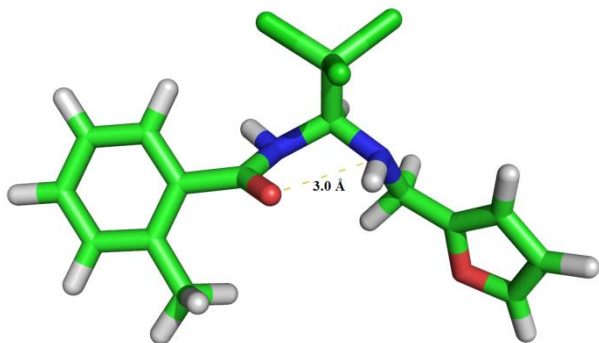

**E8,  $\Delta G = -89215.4$  kcal/mol**

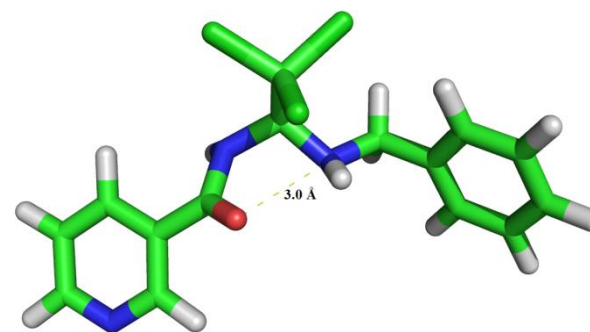

**E9,  $\Delta G = -85835.2$  kcal/mol**

**Figure S6.** Structures of compounds E2–E13 optimized by the PM3 method in the ArgusLab 4.0.1 software package (continued follows below).

\* Geometry optimization of E1 (Sal 003, S27) was carried out earlier in the work: Zadorozhnii et al. Molecular docking studies of salubrinal and its analogs as inhibitors of the GADD34:PP1 enzyme, ADMET DMPK 7 (2019) 140–150. <http://dx.doi.org/10.5599/admet.632>.

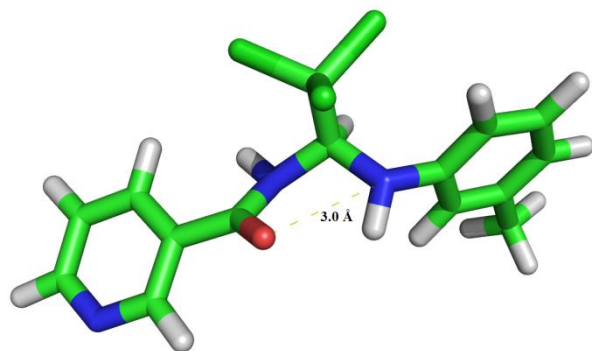

**E10,  $\Delta G = -85837.5$  kcal/mol**

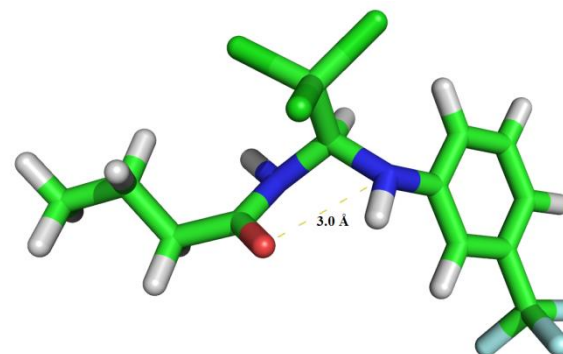

**E11,  $\Delta G = -107148.8$  kcal/mol**

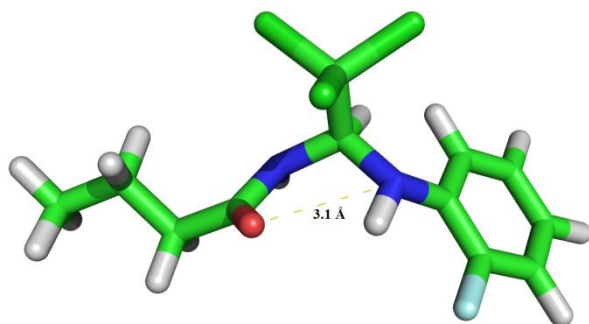

**E12,  $\Delta G = -84079.4$  kcal/mol**

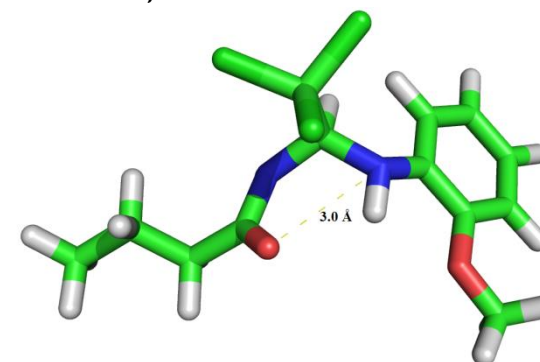

**E13,  $\Delta G = -84493.8$  kcal/mol**

**Figure S6. Cont.**

\* Geometry optimization of **E1** (Sal 003, **S27**) was carried out earlier in the work: Zadorozhnii et al. Molecular docking studies of salubrinal and its analogs as inhibitors of the GADD34:PP1 enzyme, ADMET DMPK 7 (2019) 140–150. <http://dx.doi.org/10.5599/admet.632>.

**Table S15.** Predicted results of the total clearance (CL<sub>tot.</sub>) and half-life time (T<sub>1/2</sub>) for Salubrinal and its analogues.

| Comp. | Total clearance (CL <sub>tot.</sub> ), mL/min/kg |                        |                    | Half-life (T <sub>1/2</sub> ), h |
|-------|--------------------------------------------------|------------------------|--------------------|----------------------------------|
|       | ADMETLab                                         | pkCSM *                |                    |                                  |
|       |                                                  | log CL <sub>tot.</sub> | CL <sub>tot.</sub> |                                  |
| S1    | 0.780                                            | -0.166                 | 0.682              | 1.928                            |
| S2    | 0.660                                            | -0.306                 | 0.494              | 1.948                            |
| S3    | 0.709                                            | -0.289                 | 0.514              | 1.980                            |
| S4    | 0.609                                            | -0.403                 | 0.395              | 1.954                            |
| S5    | 1.092                                            | -0.256                 | 0.555              | 1.073                            |
| S6    | 1.108                                            | -0.088                 | 0.817              | 0.862                            |
| S7    | 0.860                                            | -0.437                 | 0.366              | 1.571                            |
| S8    | 0.773                                            | -0.343                 | 0.454              | 1.819                            |
| S9    | 0.802                                            | -0.385                 | 0.412              | 1.794                            |
| S10   | 0.792                                            | -0.450                 | 0.355              | 1.731                            |
| S11   | 0.764                                            | -0.402                 | 0.396              | 1.795                            |
| S12   | 0.819                                            | -0.487                 | 0.326              | 1.778                            |
| S13   | 0.793                                            | -0.443                 | 0.361              | 1.780                            |
| S14   | 0.834                                            | -0.495                 | 0.320              | 1.784                            |
| S15   | 0.921                                            | -0.260                 | 0.550              | 1.238                            |
| S16   | 0.893                                            | -0.341                 | 0.456              | 1.317                            |
| S17   | 0.780                                            | -0.288                 | 0.515              | 1.628                            |
| S18   | 0.901                                            | -0.112                 | 0.773              | 1.387                            |
| S19   | 0.865                                            | -0.314                 | 0.485              | 1.393                            |
| S20   | 0.825                                            | -0.216                 | 0.608              | 1.275                            |
| S21   | 0.790                                            | -0.420                 | 0.380              | 1.292                            |
| S22   | 0.862                                            | -0.096                 | 0.802              | 1.458                            |
| S23   | 0.793                                            | -0.261                 | 0.548              | 1.531                            |
| S24   | 0.745                                            | -0.325                 | 0.473              | 1.589                            |
| S25   | 0.811                                            | -0.206                 | 0.622              | 1.635                            |
| S26   | 0.872                                            | -0.416                 | 0.384              | 1.638                            |
| S27   | 0.781                                            | -0.478                 | 0.333              | 1.624                            |
| S28   | 0.739                                            | -0.498                 | 0.318              | 1.696                            |
| S29   | 0.798                                            | -0.284                 | 0.520              | 1.663                            |



| Comp. | Total clearance (CL <sub>tot.</sub> ), mL/min/kg |                        |                    | Half-life (T <sub>1/2</sub> ), h |
|-------|--------------------------------------------------|------------------------|--------------------|----------------------------------|
|       | ADMETLab                                         | pkCSM *                |                    |                                  |
|       |                                                  | log CL <sub>tot.</sub> | CL <sub>tot.</sub> |                                  |
| S30   | 0.830                                            | −0.282                 | 0.522              | 1.663                            |
| S31   | 0.775                                            | −0.225                 | 0.600              | 1.562                            |
| S32   | 0.753                                            | −0.553                 | 0.280              | 1.694                            |
| S33   | 0.571                                            | −0.394                 | 0.404              | 1.792                            |
| S34   | 0.495                                            | −0.592                 | 0.256              | 1.704                            |
| S35   | 0.828                                            | −0.360                 | 0.440              | 1.605                            |
| S36   | 0.870                                            | −0.540                 | 0.288              | 1.605                            |
| S37   | 0.818                                            | −0.122                 | 0.755              | 1.785                            |
| S38   | 0.981                                            | −0.193                 | 0.641              | 1.475                            |
| S39   | 1.062                                            | 0.202                  | 1.592              | 1.328                            |
| S40   | 0.992                                            | 0.154                  | 1.426              | 1.478                            |
| S41   | 0.961                                            | −0.051                 | 0.889              | 1.724                            |
| S42   | 0.944                                            | −0.037                 | 0.918              | 1.648                            |
| S43   | 1.019                                            | −0.071                 | 0.849              | 1.611                            |
| S44   | 1.041                                            | −0.065                 | 0.861              | 1.708                            |
| S45   | 0.770                                            | −0.039                 | 0.914              | 1.929                            |
| S46   | 0.942                                            | −0.166                 | 0.682              | 1.902                            |
| S47   | 0.920                                            | −0.214                 | 0.611              | 1.862                            |
| S48   | 0.918                                            | −0.224                 | 0.597              | 1.849                            |
| S49   | 0.947                                            | −0.229                 | 0.590              | 1.866                            |
| S50   | 0.922                                            | −0.319                 | 0.480              | 1.832                            |
| S51   | 0.994                                            | −0.143                 | 0.719              | 1.583                            |
| S52   | 0.975                                            | −0.223                 | 0.598              | 1.845                            |
| S53   | 0.985                                            | −0.086                 | 0.820              | 1.630                            |
| S54   | 0.725                                            | −0.221                 | 0.601              | 1.863                            |
| S55   | 0.759                                            | −0.351                 | 0.446              | 1.833                            |

\* pkCSM provides the forecast result as the logCL<sub>tot.</sub> value. For the unification of the results, the obtained values were converted to CL<sub>tot.</sub>
